# Supplementary material for: A Fluorescent Reporter-Based Evaluation Assay for Antibacterial Components Against Xanthomonas citri subsp. citri
Source: Frontiers journal article supplement (doi:10.3389/fmicb.2022.864963), 2022-05-04
Supplement: Table_1.XLSX [file Table_1.XLSX]

## Sheet: All metabolites
Index	Compounds	Class I	Class II	Q1 (Da)	Molecular Weight (Da)	Ionization model	Formula	KEGG ID	HMDB	Pubchem CID	Burkholderia strain-1440
MW0127057	δ-Octalactone	-	-	285.205	142.099	[2M+H]+	C8H14O2	-	HMDB0038310	12777	381850
MEDN0074	γ-L-Glutamate-Cysteine	Amino acid and Its metabolomics	Small Peptide	249.055	250.062	[M-H]-	C8H14N2O5S	C00669	HMDB0001049	123938	125370
MEDP0367	γ-Aminobutyric Acid	Amino acid and Its metabolomics	Amino acid derivatives	104.06	103.063	[M+H]+	C4H9NO2	C00334	HMDB0000112	119	11687
MEDN0434	Β-Pseudouridine	Nucleotide And Its metabolomics	Nucleotide and Its metabolomics	243.062	244.07	[M-H]-	C9H12N2O6	C02067	HMDB0000767	15047	13553
MW0103256	β-Estradiol 3-sulfate	-	-	351.133	352.134	[M-H]-	C18H24O5S	-	-	54254881	227820
MW0115521	α-Pyrrolidinopropiophenone	-	-	221.164	203.131	[M+NH4]+	C13H17NO	-	-	209045	701830
MW0010104	α-Hydroxymetoprolol	-	-	266.175	283.178	[M+H-H2O]+	C15H25NO4	-	HMDB0060994	114962	52985
MW0127026	α-Hydroxyalprazolam	-	-	325.084	324.078	[M+H]+	C17H13ClN4O	-	HMDB0013943	162244	14825
MW0170035	α-CEHC	-	-	277.144	278.152	[M-H]-	C16H22O4	-	-	-	114990
MEDL02229	Zingerone	-	-	193.085	194.094	[M-H]-	C11H14O3	C17497	HMDB0032590	31211	829080
MEDP1841	Zerumbone	Aldehyde,Ketones,Esters	Ketones	219.177	218.33	[M+H]+	C15H22O	C20262	-	5470187	123920
MW0139983	Yuzu lactone	-	-	195.138	1310.92	[M-H]-	C12H20O2	-	HMDB0032901	10878079	19900
MW0103159	xi-5-Hydroxydodecanoic acid	-	-	215.165	1198.8	[M-H]-	C12H24O3	-	HMDB0040169	24520	47592
MEDP0426	Xanthurenic Acid	Amino acid and Its metabolomics	Amino acid derivatives	206.1	205.038	[M+H]+	C10H7NO4	C02470	HMDB0000881	5699	124640
MW0159416	Xanthoxin;2-cis,4-trans-Xanthoxin	-	-	287.103	250.157	[M-2H+K]-	C15H22O3	C13453	-	5282222	163930
MEDP2042	Xanthosine	Nucleotide And Its metabolomics	Nucleotide and Its metabolomics	285.084	284.076	[M+H]+	C10H12N4O6	-	HMDB0000299	64959	21119
MEDN0140	Xanthine	Nucleotide And Its metabolomics	Nucleotide and Its metabolomics	151.026	152.033	[M-H]-	C5H4N4O2	C00385	HMDB0000292	1188	6065200
MEDN0241	Vitamin D3	CoEnzyme and vitamins	CoEnzyme and vitamins	383.331	384.339	[M-H]-	C27H44O	C05443	HMDB0000876	10883523	22836
MW0010062	Viloxazine	-	-	238.142	237.137	[M+H]+	C13H19NO3	D08673	-	5666	42931
MW0110466	Vildagliptin	-	-	304.201	303.195	[M+H]+	C17H25N3O2	D07080	HMDB0015596	6918537	250520
MW0159307	Variotin;Pecilocin	-	-	290.176	291.183	[M-H]-	C17H25NO3	C12905	-	5282176	227130
MW0110435	Valyl-Alanine	-	-	211.107	296.101	[M+Na]+	C13H16N2O6	-	HMDB0029120	6992638	8115700
MEDP1613	Val-Val	-	-	199.144	216.147	[M+H-H2O]+	C10H20N2O3	-	-	107475	2958900
MEDN1616	Val-Pro-Leu	Amino acid and Its metabolomics	Small Peptide	326.208	327.216	[M-H]-	C16H29N3O4	-	-	146208	32801
MEDN1548	Val-Ala	Amino acid and Its metabolomics	Small Peptide	187.097	188.116	[M-H]-	C8H16N2O3	-	-	6992638	519610
MW0159238	Val Val Gly Asp Val	-	-	488.273	487.264	[M+H]+	C21H37N5O8	-	-	-	193230
MW0159118	Val Phe Asp Arg	-	-	534.268	535.275	[M-H]-	C24H37N7O7	-	-	-	276390
MW0159029	Val His Phe Glu	-	-	531.258	530.249	[M+H]+	C25H34N6O7	-	-	-	9
MW0159028	Val His Phe	-	-	402.211	401.206	[M+H]+	C20H27N5O4	-	-	-	38670
MW0158961	Val Gln Ala Arg	-	-	471.27	472.276	[M-H]-	C19H36N8O6	-	-	-	49215
MW0110339	Val Gln	-	-	309.155	245.138	[M+CH3CN+Na]+	C10H19N3O4	-	-	-	3798500
MW0010023	Usnic acid	-	-	343.073	344.09	[M-H]-	C18H16O7	C05153	-	5646	180410
MEDP0357	Urocanic Acid	Organic acid And Its derivatives	Organic acid And Its derivatives	139.04	138.043	[M+H]+	C6H6N2O2	C00785	HMDB0000301	736715	13728000
MEDN0171	Uridine	Nucleotide And Its metabolomics	Nucleotide and Its metabolomics	243.065	244.07	[M-H]-	C9H12N2O6	C00299	HMDB0000296	6029	33641
MEDP1466	Ureidosuccinic acid	Amino acid and Its metabolomics	Amino acid derivatives	177	176.13	[M+H]+	C5H8N2O5	C00438	HMDB0000828	93072	576860
MW0010017	Urea, N-[2-methyl-5-(1-piperidinylsulfonyl)-3-furanyl]-N'-phenyl-	-	-	364.128	363.125	[M+H]+	C17H21N3O4S	-	-	2810413	143640
MEDP0086	Urea	Alcohol and amines	Amines	61	60.032	[M+H]+	CH4N2O	C00086	HMDB0000294	1176	452140
MEDP0178	Uracil	Nucleotide And Its metabolomics	Nucleotide and Its metabolomics	113.027	112.027	[M+H]+	C4H4N2O2	C00106	HMDB0000300	1174	636150
MEDL02752	Umbelliferone	-	-	163.039	162.032	[M+H]+	C9H6O3	C09315	HMDB0029865	5281426	3288700
MEDP0539	Ubiquinone-1	CoEnzyme and vitamins	CoEnzyme and vitamins	251.121	250.121	[M+H]+	C14H18O4	C00399	HMDB0002012	4462	9
MW0110317	Tyr-Val	-	-	319.105	280.142	[M+K]+	C14H20N2O4	-	-	7009560	64285
MEDP1895	Tyr-Phe	Amino acid and Its metabolomics	Small Peptide	311.139	311.139	[M+H-H2O]+	C18H20N2O4	-	HMDB0029112	3421919	17132000
MW0110294	Tyrosyl-Threonine	-	-	265.118	1395.02	[M+H-H2O]+	C13H18N2O5	-	HMDB0029115	14522584	281480
MW0110293	Tyrosyl-Serine	-	-	268.107	1395.02	[M+]+	C12H16N2O5	-	HMDB0029114	18218253	5920600
MW0158702	TyrMe-His-OH	-	-	455.158	454.149	[M+H]+	C22H22N4O7	-	-	-	43771
MW0110250	Tyr-Glu	-	-	310.114	310.116	[M+]+	C14H18N2O6	-	-	7009628	125270
MW0110225	Tyr Tyr	-	-	327.131	344.137	[M+H-H2O]+	C18H20N2O5	-	-	-	220820
MW0158639	Tyr Trp Leu	-	-	481.247	480.237	[M+H]+	C26H32N4O5	-	-	-	324060
MW0158598	Tyr Ser Asn Arg	-	-	539.259	538.25	[M+H]+	C22H34N8O8	-	-	-	86067
MW0158588	Tyr Pro His	-	-	416.202	415.186	[M+H]+	C20H25N5O5	-	-	-	9
MW0110214	Tyr Phe Lys	-	-	457.245	456.237	[M+H]+	C24H32N4O5	-	-	-	316970
MW0158392	Tyr Asn Gln Asp	-	-	539.209	538.202	[M+H]+	C22H30N6O10	-	-	-	8174000
MW0158378	Tyr Arg Leu	-	-	451.266	450.259	[M+H]+	C21H34N6O5	-	-	-	4587300
MW0110176	Tumonoic Acid E	-	-	326.231	325.225	[M+H]+	C18H31NO4	-	-	25058107	964450
MW0102994	Tuberonic acid	-	-	227.128	226.12	[M+H]+	C12H18O4	C21385	-	5497122	14620
MEDP0214	Tryptamine	Tryptamines,Cholines,Pigments	Tryptamines	161.1	160.1	[M+H]+	C10H12N2	C00398	HMDB0000303	1150	164780
MW0158157	Trp Gly Val	-	-	361.19	360.18	[M+H]+	C18H24N4O4	-	-	-	104110
MW0158133	Trp Gln Ile	-	-	446.235	445.233	[M+H]+	C22H31N5O5	-	-	-	94096
MW0158092	Trp Ala Tyr	-	-	439.208	438.19	[M+H]+	C23H26N4O5	-	-	-	1829700
MW0009999	Tropicamide	-	-	285.158	284.152	[M+H]+	C17H20N2O2	D00397	HMDB0014947	5593	282960
MW0158067	Trioxilin B3;(5Z,8Z,14Z)-(11R,12R)-10,11,12-Trihydroxyeicosa-5,8,14-trienoic acid;(5Z,8Z,14Z)-(11R,12R)-10,11,12-Trihydroxyicosa-5,8,14-trienoic acid	-	-	353.23	354.241	[M-H]-	C20H34O5	C14811	HMDB0001965	121000000	189590
MEDP0084	Trimethylamine N-Oxide	Alcohol and amines	Amines	76	75.0684	[M+H]+	C3H9NO	C01104	HMDB0000925	1145	1037700
MEDP0251	Trigonelline	CoEnzyme and vitamins	CoEnzyme and vitamins	138	137.048	[M+H]+	C7H7NO2	C01004	HMDB0000875	5570	52209
MW0158057	Trifenmorph;4-Tritylmorpholine	-	-	328.173	329.178	[M-H]-	C23H23NO	C19144	-	14993	365380
MEDP0535	Triethyl phosphate	Organic acid And Its derivatives	Phosphoric acids	183.071	182.071	[M+H]+	C6H15O4P	-	HMDB0012228	74190	50915
MEDN1406	Tridecanedioic acid	FA	FFA	243.161	244.167	[M-H]-	C13H24O4	-	-	10458	686930
MW0102923	Tricaproin	-	-	409.257	386.267	[M+Na]+	C21H38O6	-	HMDB0031125	12131	785790
MW0111327	Tribenuron-methyl	-	-	418.08	395.09	[M+Na]+	C15H17N5O6S	C10962	-	153909	210000
MW0009967	Triadimenol	-	-	296.12	295.109	[M+H]+	C14H18ClN3O2	C11127	-	41368	939160
MEDP1810	TriacetonaMine	Heterocyclic compounds	Heterocyclic compounds	156.138	155.131	[M+H]+	C9H17NO	-	HMDB0031179	13220	1419200
MEDP1809	Triacetin	Aldehyde,Ketones,Esters	Esters	219.086	218.079	[M+H]+	C9H14O6	-	HMDB0029592	5541	205780
MW0158013	Tremetone	-	-	203.105	202.099	[M+H]+	C13H14O2	C08992	-	78673	2025800
MEDP1808	Trans-Zeatin	Heterocyclic compounds	Heterocyclic compounds	220.121	219.112	[M+H]+	C10H13N5O	C00371	HMDB0012204	449093	44906
MEDP0364	Trans-3-Hydroxycotinine	Heterocyclic compounds	Heterocyclic compounds	193.09	192.09	[M+H]+	C10H12N2O2	-	HMDB0001390	10219774	32593
MW0115388	trans-2-Dodecenal	-	-	183.174	182.167	[M+H]+	C12H22O	-	HMDB0031020	5283361	319190
MW0157971	trans,trans-Farnesyl phosphate;Farnesyl phosphate;(2E,6E)-Farnesyl phosphate	-	-	301.154	302.165	[M-H]-	C15H27O4P	C20121	-	10357552	26400
MEDN1119	Trans dehydrorosinone	Aldehyde,Ketones,Esters	Ketones	287.201	288.209	[M-H]-	C19H28O2	-	-	5881	43131
MEDP0689	TranexamicAcid	Organic acid And Its derivatives	Organic acid And Its derivatives	158.1	157.11	[M+H]+	C8H15NO2	-	-	5526	10399
MW0157951	Toluene-cis-dihydrodiol;(1S,2R)-3-Methylcyclohexa-3,5-diene-1,2-diol	-	-	291.096	126.068	[2M+K]+	C7H10O2	C04592	-	440399	86573
MW0115371	Tolmetin	-	-	258.112	257.105	[M+H]+	C15H15NO3	C07149	HMDB0014643	5509	201640
MW0009934	Tolbutamide	-	-	293.089	270.104	[M+Na]+	C12H18N2O3S	C07148	HMDB0015256	5505	244310
MW0102812	Tiaprost	-	-	361.15	396.161	[M+H-2H2O]+	C20H28O6S	D08591	-	6435135	158500
MEDP0177	Thymine	Nucleotide And Its metabolomics	Nucleotide and Its metabolomics	127	126.043	[M+H]+	C5H6N2O2	C00178	HMDB0000262	1135	3085400
MW0103676	Thymidine-5'-triphosphate	-	-	480.983	481.989	[M-H]-	C10H17N2O14P3	C00459	HMDB0001342	64968	1337800
MEDP0176	Thymidine	Nucleotide And Its metabolomics	Nucleotide and Its metabolomics	243.09	242.09	[M+H]+	C10H14N2O5	C00214	HMDB0000273	5789	1210800
MW0109886	Thr Met	-	-	292.138	250.099	[M+CH3CN+H]+	C9H18N2O4S1	-	-	7020165	227700
MW0157677	Thr Ile Asp Phe Glu	-	-	622.266	623.28	[M-H]-	C28H41N5O11	-	-	-	411440
MW0157668	Thr His Phe Lys	-	-	530.275	531.28	[M-H]-	C25H37N7O6	-	-	-	9
MW0157643	Thr Gly Ala Ala Glu	-	-	489.227	447.197	[M+CH3CN+H]+	C17H29N5O9	-	-	-	9
MW0157638	Thr Glu Phe Asp	-	-	511.209	510.196	[M+H]+	C22H30N4O10	-	-	-	9
MEDP0593	Thioguanine	Nucleotide And Its metabolomics	Nucleotide and Its metabolomics	168.027	167.027	[M+H]+	C5H5N5S	-	HMDB0014496	2723601	9
MEDN0134	Thiamine Pyrophosphate（TPP）	CoEnzyme and vitamins	CoEnzyme and vitamins	424.037	425.045	[M-H]-	C12H19N4O7P2S	C00068	HMDB0001372	1132	36636
MEDP1479	Theophylline	Heterocyclic compounds	Heterocyclic compounds	181.1	180.065	[M+H]+	C7H8N4O2	C07130	HMDB0001889	2153	23837
MEDN1054	Tetranor-12(R)-HETE	FA	Oxidized lipids	265.18	266.188	[M-H]-	C16H26O3	-	-	90469827	4551200
MW0139809	Tetrangomycin	-	-	323.09	322.084	[M+H]+	C19H14O5	C12396	-	160887	1639400
MW0157441	Tetrahydropteroyldiglutamate	-	-	609.186	574.214	[M+Cl]-	C24H30N8O9	C09332	-	135000000	9182.7
MW0000458	Tetrahydroharman-3-carboxylic acid	-	-	231.12	230.106	[M+H]+	C13H14N2O2	-	HMDB0037942	4264556	46096
MW0111301	Tetraethylammonium cation	-	-	207.078	130.16	[M-H+2K]+	C8H20N	C07512	-	5413	55101
MW0109815	Tetradecylphosphonate	-	-	259.19	278.201	[M-H2O-H]-	C14H31O3P	-	-	78401	83780
MEDP1892	Tetradecylamine	Alcohol and amines	Amines	214.251	213.246	[M+H]+	C14H31N	-	-	16217	92517
MEDN0604	Tetradecanedioic acid	FA	FFA	257.175	258.183	[M-H]-	C14H26O4	C11002	HMDB0000872	13185	146150
MW0063802	Tetradecanal	-	-	254.246	1240.85	[M+CH3CN+H]+	C14H28O	-	HMDB0034283	31291	144630
MEDN0086	Terephthalic Acid	Benzene and substituted derivatives	Phenolic acids	165.019	166.027	[M-H]-	C8H6O4	C06337	HMDB0002428	7489	4272300
MW0126653	Terbuthylazine	-	-	230.117	229.109	[M+H]+	C9H16ClN5	C18810	-	22206	536310
MW0009863	Terbutaline	-	-	208.132	225.137	[M+H-H2O]+	C12H19NO3	C07129	HMDB0015009	5403	9
MW0109802	Terbufos	-	-	330.078	288.044	[M+CH3CN+H]+	C9H21O2PS3	C18693	-	25670	2039000
MW0009857	Tenovin-1	-	-	370.158	369.151	[M+H]+	C20H23N3O2S	-	-	1013376	23343
MW0103666	Telbivudine	-	-	243.096	242.09	[M+H]+	C10H14N2O5	D06675	HMDB0015394	159269	841540
MW0126630	TDP-2	-	-	317.147	334.153	[M+H-H2O]+	C17H22N2O5	-	HMDB0037499	103000000	152100
MW0126616	Swainsonine	-	-	138.09	173.105	[M+H-2H2O]+	C8H15NO3	C10173	-	51683	349350
MW0063704	Sulfaphenazole	-	-	378.096	314.084	[M+CH3CN+Na]+	C15H14N4O2S	D01954	HMDB0015667	5335	1654700
MW0009783	Sulfachlorpyridazine	-	-	283.01	284.014	[M-H]-	C10H9ClN4O2S	D05948	-	6634	350460
MW0009781	Sulfacetamide	-	-	213.03	214.041	[M-H]-	C8H10N2O3S	D05947	HMDB0014772	5320	237250
MEDN0651	Succinic anhydride	Organic acid And Its derivatives	Organic acid And Its derivatives	99.0082	100.016	[M-H]-	C4H4O3	C19524	HMDB0032523	7922	3071000
MEDN0201	Succinic Acid	Organic acid And Its derivatives	Organic acid And Its derivatives	117.019	118.027	[M-H]-	C4H6O4	C00042	HMDB0000254	1110	1381800
MEDN0344	Subericacid	Organic acid And Its derivatives	Organic acid And Its derivatives	173.081	174.089	[M-H]-	C8H14O4	C08278	HMDB0000893	10457	113630
MW0000452	Strychnine	-	-	369.133	334.168	[M+Cl]-	C21H22N2O2	C06522	-	441071	9
MW0009758	Sotalol	-	-	273.123	272.12	[M+H]+	C12H20N2O3S	C07309	HMDB0014632	5253	518600
MEDP0442	Sn-Glycero-3-Phosphocholine	Tryptamines,Cholines,Pigments	Cholines	258.2	257.103	[M+H]+	C8H20NO6P	C00670	HMDB0000086	71920	9115900
MW0009746	Sinapaldehyde	-	-	245.017	208.074	[M-2H+K]-	C11H12O4	C05610	-	5280802	169270
MEDP1356	Shinorine	Amino acid and Its metabolomics	Amino acid derivatives	333.128	332.122	[M+H]+	C13H20N2O8	-	HMDB0039002	-	5973200
MW0063514	S-Farnesylcysteine	-	-	362.156	325.208	[M-2H+K]-	C18H31NO2S	C19691	HMDB0011627	6438372	64815
MW0157029	Ser-Trp	-	-	290.117	291.122	[M-H]-	C14H17N3O4	-	HMDB0029050	14409363	15194
MW0157017	Ser-Nap-OH	-	-	425.135	424.127	[M+H]+	C22H20N2O7	-	-	-	634980
MW0156789	Ser Ile Arg Arg	-	-	529.323	530.329	[M-H]-	C21H42N10O6	-	-	-	3992800
MW0156749	Ser Gly Ala Asn Lys	-	-	476.25	475.239	[M+H]+	C18H33N7O8	-	-	-	70983
MW0156721	Ser Glu	-	-	235.098	234.085	[M+H]+	C8H14N2O6	-	-	7023503	299470
MW0156676	Ser Asp Asn	-	-	335.121	334.113	[M+H]+	C11H18N4O8	-	-	-	739040
MW0156659	Ser Asn Gln Asp	-	-	461.18	462.171	[M-H]-	C16H26N6O10	-	-	-	2741.8
MW0156650	Ser Arg Phe Lys	-	-	537.313	536.307	[M+H]+	C24H40N8O6	-	-	-	134400
MW0126523	Scriptaid	-	-	327.12	326.127	[M+H]+	C18H18N2O4	-	-	5186	766660
MW0063480	Sclareol	-	-	345.228	308.272	[M-2H+K]-	C20H36O2	C09183	HMDB0036827	163263	476780
MW0139667	Schizandrin	-	-	415.211	432.215	[M+H-H2O]+	C24H32O7	C17064	-	23915	1740000
MEDP1800	Sanguinarine	Heterocyclic compounds	Heterocyclic compounds	332.094	332.092	[M+H]+	C20H14NO4+	C06162	HMDB0029367	5154	86394
MW0139633	Salvianolic acid A	-	-	513.119	494.121	[M+F]-	C26H22O10	C10492	-	5281793	489280
MW0009716	Salutaridine	-	-	362.12	327.147	[M+Cl]-	C19H21NO4	C05179	-	5408233	76521
MW0115251	Salidroside	-	-	323.113	300.121	[M+Na]+	C14H20O7	C06046	-	159278	51248
MEDP1032	Salicylaldehyde	Benzene and substituted derivatives	Benzene and substituted derivatives	105.034	122.037	[M-H2O+H]+	C7H6O2	-	HMDB0034170	6998	387450
MEDL02232	Salicin	-	-	338.098	286.105	[M+Cl+NH3]-	C13H18O7	C01451	HMDB0003546	439503	44777
MW0156474	S,S-Dimethyl-beta-propiothetin;S-Dimethylsulfonium propionic acid;Dimethylpropiothetin;DMPT;DMSP	-	-	269.08	134.04	[2M+H]+	C5H10O2S	C04022	-	23736	861420
MW0156473	S-(Phenylacetothiohydroximoyl)-L-cysteine	-	-	237.075	254.072	[M+H-H2O]+	C11H14N2O3S	C17237	-	25246415	1256700
MW0109561	S-(Hydroxymethyl)glutathione	-	-	374.039	337.094	[M-2H+K]-	C11H19N3O7S	C14180	HMDB0004662	447123	7670.4
MW0109560	S-(Formylmethyl)glutathione	-	-	391.12	349.094	[M+CH3CN+H]+	C12H19N3O7S	C14871	HMDB0060507	11954074	242280
MW0156462	S-(4-Methylthiobutylthiohydroximoyl)-L-cysteine	-	-	217.047	252.06	[M+H-2H2O]+	C8H16N2O3S2	C17242	-	46173872	27359
MW0139620	Rutin	-	-	609.147	610.153	[M-H]-	C27H30O16	C05625	HMDB0003249	5280805	2043300
MW0156449	Ruspolinone	-	-	250.142	249.137	[M+H]+	C14H19NO3	C10169	-	442655	3774900
MEDP0588	Ritalinic acid	Organic acid And Its derivatives	Organic acid And Its derivatives	220	219.126	[M+H]+	C13H17NO2	-	HMDB0042008	86863	9618.9
MW0156413	Rishitin	-	-	221.154	222.162	[M-H]-	C14H22O2	C09715	HMDB0035593	108064	101200
MW0126453	Riesling acetal	-	-	242.176	1451.08	[M+NH4-2H]-	C13H22O3	-	HMDB0037562	57473083	5789600
MEDP0250	Riboflavin	CoEnzyme and vitamins	CoEnzyme and vitamins	377	376.138	[M+H]+	C17H20N4O6	C00255	HMDB0000244	493570	21340
MW0063349	Rhodotoxine	-	-	411.235	412.246	[M-H]-	C22H36O7	C09103	-	442034	217650
MW0139570	Retusin 7-methyl ether	-	-	299.09	298.084	[M+H]+	C17H14O5	-	-	6710639	201770
MW0009654	Rebamipide	-	-	369.063	370.072	[M-H]-	C19H15ClN2O4	D01121	-	5042	1600300
MW0168215	Raucaffricine;Vomilenine beta-D-glucoside	-	-	531.214	512.216	[M+F]-	C27H32N2O8	C02074	-	5280486	27738
MW0109523	Raltitrexed	-	-	439.112	458.126	[M-H2O-H]-	C21H22N4O6S	C11372	HMDB0014438	135000000	24663
MW0139552	Rabelomycin	-	-	337.068	338.079	[M-H]-	C19H14O6	-	-	168797	410310
MW0126399	Quinomethionate	-	-	234.999	233.992	[M+H]+	C10H6N2OS2	C14514	-	17109	4303200
MEDP1484	Quinoline-4-carboxylic acid	Organic acid And Its derivatives	Organic acid And Its derivatives	174	173.17	[M+H]+	C10H7NO2	C06414	-	10243	850810
MW0156310	Quinidinone	-	-	321.166	322.168	[M-H]-	C20H22N2O2	C16728	-	56928086	233080
MW0126375	Quindoxin	-	-	161.035	1338.96	[M-H]-	C8H6N2O2	-	HMDB0032927	72073	17300
MW0000411	Quebrachamine	-	-	283.224	282.21	[M+H]+	C19H26N2	C09235	HMDB0030260	92990	35107
MW0156266	Pyruvate oxime	-	-	102.027	103.027	[M-H]-	C3H5NO3	C02193	HMDB0002455	6400629	40046
MW0126361	Pyrrolnitrin	-	-	254.973	255.981	[M-H]-	C10H6Cl2N2O2	C12491	-	13916	108890
MEDN0340	Pyrrole-2-Carboxylic Acid	Organic acid And Its derivatives	Organic acid And Its derivatives	110.024	111.032	[M-H]-	C5H5NO2	C05942	HMDB0004230	12473	3481700
MW0009618	Pyriproxyfen	-	-	322.143	321.137	[M+H]+	C20H19NO3	D08455	-	91753	110590
MW0156250	Pyrimidine nucleoside;N-D-Ribosylpyrimidine	-	-	248.053	213.088	[M+Cl]-	C9H13N2O4	C03169	-	439920	41941
MEDP0240	Pyridoxine	CoEnzyme and vitamins	CoEnzyme and vitamins	170.1	169.074	[M+H]+	C8H11NO3	C00314	HMDB0000239	1054	382690
MW0126331	Pyridostigmine	-	-	181.096	181.098	[M+H]+	C9H13N2O2	C07410	HMDB0014685	4991	1463300
MW0126295	Pyrazine-2-carboxylic acid	-	-	125.038	124.027	[M+H]+	C5H4N2O2	C19915	HMDB0059734	1047	14715000
MW0126287	Pyocyanine	-	-	209.072	210.079	[M-H]-	C13H10N2O	C01748	-	6817	2426700
MW0156210	Pulcherriminic acid;2,5-Dihydroxy-3,6-bis(2-methylpropyl)pyrazine bis-N-oxide	-	-	255.134	256.142	[M-H]-	C12H20N2O4	C20515	-	3083664	146110
MEDN1162	p-Tolyl Sulfate	Organic acid And Its derivatives	Sulfonic acids	187.009	188.014	[M-H]-	C7H8O4S	-	-	4615423	92968
MW0115190	Ptd(S)Ins-(3,4)-P2(1,2-dioctanoyl)	-	-	761.167	762.185	[M-H]-	C25H49O18P3S	-	-	-	778160
MW0139445	Psoromic acid	-	-	379.042	358.069	[M+Na-2H]-	C18H14O8	-	-	23725	398410
MW0126273	Psilocin	-	-	256.115	204.126	[M+Cl+NH3]-	C12H16N2O	C08312	HMDB0042000	4980	106660
MEDL02637	Pseudoephedrine	-	-	181.126	165.115	[M-H+NH3]-	C10H15NO	C02765	HMDB0001943	7028	83532
MW0139438	Pseudobaptigenin	-	-	281.044	282.053	[M-H]-	C16H10O5	C10522	HMDB0036616	5281805	219050
MEDL01997	Prunasin	-	-	335.124	295.106	[M-H+CH3CN]-	C14H17NO6	C00844	HMDB0034934	119033	1110300
MW0062283	Prostratin	-	-	409.221	390.204	[M+F]-	C22H30O6	C20197	-	454217	104630
MW0062275	Prostaglandin I2	-	-	353.23	352.225	[M+H]+	C20H32O5	C01312	HMDB0001335	5280427	364370
MW0062243	Prostaglandin E2 p-benzamidophenyl ester	-	-	546.275	547.293	[M-H]-	C33H41NO6	-	-	90473691	9
MEDN1429	Prostaglandin B2	FA	Oxidized lipids	333.208	334.214	[M-H]-	C20H30O4	C05954	HMDB0004236	5280881	42915
MEDN1430	Prostaglandin A2	FA	Oxidized lipids	333.208	334.214	[M-H]-	C20H30O4	C05953	HMDB0002752	5280880	52344
MW0062210	Proscillaridin A	-	-	553.278	530.288	[M+Na]+	C30H42O8	C12816	-	5284613	110360
MW0126257	Propylpyrazine	-	-	121.082	1254.86	[M-H]-	C7H10N2	-	HMDB0041571	87466	165020
MW0109414	Pro-Phe	-	-	261.112	262.132	[M-H]-	C14H18N2O3	-	HMDB0011179	7081633	153080
MW0156093	Propamocarb hydrochloride	-	-	225.138	224.129	[M+H]+	C9H21N2O2. Cl	C18421	-	15575641	2038400
MW0109391	Prolyl-Methionine	-	-	247.11	1535.18	[M+H]+	C10H18N2O3S	-	HMDB0029023	7408173	759210
MEDP1945	Pro-Leu	Amino acid and Its metabolomics	Small Peptide	229.15	229.154	[M+H]+	C11H20N2O3	-	-	-	66320
MEDP1885	Pro-Ile	Amino acid and Its metabolomics	Small Peptide	211.14	228.147	[M+H-H2O]+	C11H20N2O3	-	-	7079600	52495000
MEDP1884	Pro-His	Amino acid and Its metabolomics	Small Peptide	235.117	252.122	[M+H-H2O]+	C11H16N4O3	-	HMDB0029019	18218235	45816
MW0156072	Proclavaminic acid;Proclavaminate	-	-	254.1	202.095	[M+Cl+NH3]-	C8H14N2O4	C06658	-	194953	1067300
MW0009518	Procaine	-	-	254.186	236.153	[M+NH4]+	C13H20N2O2	C07375	HMDB0014859	4914	74412
MW0109351	Pro-Asn	-	-	212.103	229.106	[M+H-H2O]+	C9H15N3O4	-	-	7408193	262090
MEDP1616	Pro-Ala	-	-	253.049	186.1	[M-2H+3Na]+	C8H14N2O3	-	-	6347578	7349900
MW0156024	Pro Tyr Asn	-	-	434.205	392.17	[M+CH3CN+H]+	C18H24N4O6	-	-	-	2206800
MW0156014	Pro Trp Gln	-	-	430.207	429.201	[M+H]+	C21H27N5O5	-	-	-	151580
MW0109334	Pro Ser	-	-	185.092	202.095	[M+H-H2O]+	C8H14N2O4	-	-	-	10495000
MW0109294	Pravastatin	-	-	461.196	424.246	[M+K-2H]-	C23H36O7	C01844	HMDB0005022	54687	21777
MW0009504	Pramocaine	-	-	294.206	293.199	[M+H]+	C17H27NO3	C07892	-	4886	9
MEDN0622	Porphobilinogen	Organic acid And Its derivatives	Organic acid And Its derivatives	225.088	226.095	[M-H]-	C10H14N2O4	C00931	HMDB0000245	1021	996880
MW0062139	Ponasterone A	-	-	463.313	464.314	[M-H]-	C27H44O6	C08835	-	115127	1026800
MW0009487	Platensimycin	-	-	422.159	441.179	[M-H2O-H]-	C24H27NO7	C20132	-	6857724	109770
MW0155599	p-Lactophenetide;4'-Ethoxylactanilide;Lactylphenetidin	-	-	208.097	209.105	[M-H]-	C11H15NO3	C14262	-	98046	22581
MW0062074	Piroxicam	-	-	330.054	331.063	[M-H]-	C15H13N3O4S	C01608	HMDB0014694	54676228	42220
MW0126185	Pirenzepine	-	-	352.179	351.17	[M+H]+	C19H21N5O2	C07508	HMDB0014808	4848	1089700
MW0126175	Piperonyl butoxide	-	-	375.152	338.209	[M+K-2H]-	C19H30O5	D08383	-	5794	19167
MEDP1304	Piperidone	Heterocyclic compounds	Heterocyclic compounds	170.1	169.11	[M+H]+	C9H15NO2	C17730	-	96024060	193910
MEDL01763	Pinosylvin methyl ether	-	-	491.163	226.099	[2M+K]+	C15H14O2	C10276	HMDB0130984	5281719	16360
MW0126142	Pinacidil	-	-	246.17	245.164	[M+H]+	C13H19N5	-	-	4826	90925
MW0000398	Pilocarpine	-	-	209.128	208.121	[M+H]+	C11H16N2O2	C07474	HMDB0015217	5910	69077
MW0155572	Pilocarpidine	-	-	193.097	194.106	[M-H]-	C10H14N2O2	C17964	-	101603	676260
MW0155571	Pikromycin	-	-	579.322	525.33	[M+Cl+NH3]-	C28H47NO8	C11999	-	5282037	14435
MW0155569	Pifithrin-	-	-	182.027	181.02	[M+H]+	C8H7NO2S	-	-	327653	241830
MW0155547	Phytolaccinic acid	-	-	539.339	516.345	[M+Na]+	C31H48O6	-	HMDB0034640	13878342	839880
MW0115141	Physostigmine	-	-	258.148	275.163	[M+H-H2O]+	C15H21N3O2	C06535	HMDB0015116	5983	234950
MW0155541	Phylloquinone oxide	-	-	503.294	466.345	[M-2H+K]-	C31H46O3	C05849	HMDB0002972	5280845	50463
MEDP2010	p-Hydroxyphenylethanolamine	Alcohol and amines	Amines	154.086	153.079	[M+H]+	C8H11NO2	-	HMDB0004825	440266	84135
MEDP0858	Phosphoenolpyruvate	Organic acid And Its derivatives	Phosphoric acids	169.2	167.982	[M+H]+	C3H5O6P	C00074	HMDB0000263	1005	904940
MEDN1692	Phosphatidylethanolamine lyso alkenyl 18:2	GP	LPE	460.28	460.283	[M-H]-	C23H44NO6P	-	-	-	130250
MW0000396	Pholcodine	-	-	397.218	398.221	[M-H]-	C23H30N2O4	D07385	HMDB0041984	5311356	81113
MW0155510	Phoenicoxanthin;Adonirubin	-	-	579.377	580.392	[M-H]-	C40H52O3	C15967	-	16061231	20409
MEDL02408	Phloretin	-	-	273.076	274.084	[M-H]-	C15H14O5	C00774	HMDB0003306	4788	50015
MW0061608	Phloionolic acid	-	-	331.248	332.256	[M-H]-	C18H36O5	C19621	HMDB0034295	5282938	33669
MW0109236	Phe-Tyr	-	-	309.124	328.142	[M-H2O-H]-	C18H20N2O4	-	HMDB0029007	515709	16600000
MEDP1911	Phe-Trp	Amino acid and Its metabolomics	Small Peptide	352.165	351.158	[M+H]+	C20H21N3O3	-	HMDB0029006	134906	51881
MW0109230	Phe-Thr	-	-	231.111	266.127	[M+H-2H2O]+	C13H18N2O4	-	HMDB0029005	10445608	105180
MW0109227	Phe-Ser	-	-	235.107	252.111	[M+H-H2O]+	C12H16N2O4	-	-	193508	3542000
MEDP0637	Phe-Pro	Amino acid and Its metabolomics	Amino acid derivatives	263.132	262.132	[M+H]+	C14H18N2O3	-	HMDB0011177	7020642	166730
MW0126112	Phenytoin	-	-	253.098	252.09	[M+H]+	C15H12N2O2	C07443	HMDB0014397	1775	66434
MW0109208	Phenylalanyl-Isoleucine	-	-	261.16	278.163	[M+H-H2O]+	C15H22N2O3	-	HMDB0028998	7010566	1146000
MW0109205	Phenylalanyl-Glycine	-	-	207.102	1577.22	[M+H-H2O]+	C11H14N2O3	-	HMDB0028995	6992304	424120
MW0009416	Phenylacetonitrile	-	-	135.095	117.058	[M+NH4]+	C8H7N	C16074	HMDB0034171	8794	1437300
MW0155485	Phenylacetone;1-Phenyl-2-propanone	-	-	135.08	134.073	[M+H]+	C9H10O	C15512	-	7678	10851000
MW0009410	Phenyl isocyanate	-	-	120.043	119.037	[M+H]+	C7H5NO	-	HMDB0062270	7672	753850
MW0111253	Phentolamine	-	-	282.158	281.153	[M+H]+	C17H19N3O	-	HMDB0014830	4920903	56075
MEDL01916	Phenol	-	-	93.0341	94.0419	[M-H]-	C6H6O	C00146	HMDB0000228	996	85732
MW0126091	Phenazine-1,6-dicarboxylic acid	-	-	269.055	268.048	[M+H]+	C14H8N2O4	C12119	-	193025	3473200
MW0155453	Phe-Lys-OH	-	-	400.151	401.159	[M-H]-	C20H23N3O6	-	-	-	1111400
MEDP1882	Phe-Leu	Amino acid and Its metabolomics	Small Peptide	261.16	251.15	[M+H-H2O]+	C15H22N2O3	-	-	-	9704700
MW0109173	Phe-His	-	-	285.134	302.138	[M+H-H2O]+	C15H18N4O3	-	HMDB0028997	146000000	1174300
MW0155445	Phe-Gly-OH	-	-	329.077	330.085	[M-H]-	C16H14N2O6	-	-	-	440540
MW0109170	Phe-Gly	-	-	205.097	222.1	[M+H-H2O]+	C11H14N2O3	-	-	6992303	19441000
MEDL00356	Phe-Asp	-	-	280.098	348.069	[M+]+	C13H16N2O5	-	HMDB0028991	6992643	95572
MEDP1507	Phe-Asn	Amino acid and Its metabolomics	Small Peptide	280	279.122	[M+H]+	C13H17N3O4	-	-	10468817	1098000
MW0155439	Phe-Abu-OH	-	-	357.111	358.116	[M-H]-	C18H18N2O6	-	-	-	2260000
MW0155436	Phe4Cl-TyrMe-OH	-	-	485.111	484.104	[M+H]+	C24H21ClN2O7	-	-	-	5753000
MW0155423	Phe4Cl-Gly-OH	-	-	363.037	364.046	[M-H]-	C16H13ClN2O6	-	-	-	1039300
MW0155407	Phe Val His	-	-	402.211	401.206	[M+H]+	C20H27N5O4	-	-	-	3253400
MW0155355	Phe Thr Lys Lys	-	-	521.314	522.317	[M-H]-	C25H42N6O6	-	-	-	3000000
MW0155242	Phe Leu Asn	-	-	375.202	392.206	[M+H-H2O]+	C19H28N4O5	-	-	-	79691
MW0155229	Phe Ile His Arg	-	-	572.335	571.323	[M+H]+	C27H41N9O5	-	-	-	64162
MW0155154	Phe Gln Ala Arg	-	-	519.269	520.276	[M-H]-	C23H36N8O6	-	-	-	177710
MW0155114	Phe Asn Thr Lys	-	-	507.261	508.264	[M-H]-	C23H36N6O7	-	-	-	9705.8
MEDN0798	PGK1	FA	Oxidized lipids	351.217	352.225	[M-H]-	C20H32O5	-	-	-	105190
MW0155042	PGF2 dimethyl amine	-	-	368.314	367.309	[M+H]+	C22H41NO3	-	-	-	18329
MEDN0794	PGF1α	FA	Oxidized lipids	355.248	356.256	[M-H]-	C20H36O5	-	-	5280939	34869
MEDN0791	PGD1	FA	Oxidized lipids	353.233	354.241	[M-H]-	C20H34O5	C06438	HMDB0005102	5280936	52123
MEDL02573	Petasiphenone	-	-	329.065	330.074	[M-H]-	C17H14O7	-	HMDB0031706	16066851	34604
MEDL02667	Perlolyrine	-	-	265.098	264.09	[M+H]+	C16H12N2O2	C09231	HMDB0030327	160179	53796
MW0126067	Penthiopyrad	-	-	360.133	359.128	[M+H]+	C16H20F3N3OS	C18482	-	11388558	249500
MW0154994	Pentalen-13-al	-	-	253.141	218.167	[M+Cl]-	C15H22O	C19939	-	56928137	208750
MW0154993	Pentahydroxyflavanone;Dihydrotricetin	-	-	339.031	304.058	[M+Cl]-	C15H12O7	C05911	-	440836	29842
MEDN1333	Pentadecanoic acid	Organic acid And Its derivatives	Organic acid And Its derivatives	241	242.225	[M-H]-	C15H30O2	C13426	HMDB0000826	13849	29129
MW0061026	Pentadecanal	-	-	261.197	226.23	[M+Cl]-	C15H30O	C01948	HMDB0031078	17697	9
MW0154985	Penitrem F	-	-	616.282	617.291	[M-H]-	C37H44ClNO5	C20598	-	3086086	31834
MW0139279	Pelargonin; Pelargonidin 3,5-di-beta-D-glucoside	-	-	595.164	595.166	[M+H]+	C27H31O15	C08725	HMDB0033681	441772	172210
MW0139268	Pelargonidin 3-glucoside	-	-	474.135	433.113	[M+CH3CN+H]+	[C21H21O10]+	C12137	-	443648	113040
MW0126052	Pefloxacin	-	-	334.155	333.149	[M+H]+	C17H20FN3O3	D02306	HMDB0014630	51081	2908800
MEDL02307	p-Coumaroylagmatine	-	-	297.132	276.159	[M-2H+Na]-	C14H20N4O2	C04498	HMDB0033460	5280691	360570
MEDP0101	P-Coumaric Acid	Benzene and substituted derivatives	Phenolic acids	165.047	164.047	[M+H]+	C9H8O3	C00811	HMDB0002035	637542	32283
MEDN1145	P-chlorophenylalanine	Benzene and substituted derivatives	Phenolic acids	198.032	199.04	[M-H]-	C9H10ClNO2	-	-	4652	1480500
MEDP1221	PC(O-16:0/O-1:0)	GP	PC-O	496.3	495.369	[M+H]+	C25H54NO6P	-	-	-	77377
MW0009339	Pargyline	-	-	341.207	159.105	[2M+Na]+	C11H13N	C07414	HMDB0015563	4688	52922
MW0009336	Paraoxon	-	-	310.026	275.056	[M+Cl]-	C10H14NO6P	C06606	HMDB0013035	9395	235850
MW0009333	Paradol	-	-	277.18	278.188	[M-H]-	C17H26O3	C10482	HMDB0030801	94378	420700
MEDN0245	Pantothenate	CoEnzyme and vitamins	CoEnzyme and vitamins	218.103	219.1	[M-H]-	C9H17NO5	C00864	HMDB0000210	988	155370
MEDP0389	Pantetheine	CoEnzyme and vitamins	CoEnzyme and vitamins	279.13	278.13	[M+H]+	C11H22N2O4S	C00831	HMDB0003426	479	69945000
MEDP0450	P-Aminobenzoate	Benzene and substituted derivatives	Phenolic acids	138	137.048	[M+H]+	C7H7NO2	C00568	HMDB0001392	978	73246
MEDP1795	Palmitoylethanolamide（(PEA）	Alcohol and amines	Amines	300.291	299.5	[M+H]+	C18H37NO2	C16512	HMDB0002100	4671	80945
MEDP1067	Palmitoyl N-isopropylamide	Alcohol and amines	Amines	320.298	297.303	[M+Na]+	C19H39NO	-	-	5063962	47674
MW0056732	Palmitelaidic acid	-	-	237.22	254.225	[M+H-H2O]+	C16H30O2	-	HMDB0012328	5282745	616250
MW0009321	p-Acetaminobenzaldehyde	-	-	162.055	163.063	[M-H]-	C9H9NO2	-	-	73942	1675300
MW0139227	Oxyresveratrol	-	-	262.108	244.074	[M+NH4]+	C14H12O4	C10273	HMDB0128505	5281717	471980
MEDP1083	Oxypurinol	Nucleotide And Its metabolomics	Nucleotide and Its metabolomics	153	152.033	[M+H]+	C5H4N4O2	C07599	HMDB0000786	135398752	1934000
MW0009302	Oxprenolol	-	-	266.172	265.168	[M+H]+	C15H23NO3	D08318	HMDB0015520	4631	109860
MW0126007	Oxolinic acid	-	-	244.061	261.064	[M+H-H2O]+	C13H11NO5	C11342	-	4628	595470
MEDP2021	Oxfenicine	Benzene and substituted derivatives	Phenolic acids	168.065	167.058	[M+H]+	C8H9NO3	-	-	36143	16495
MW0125997	Oxazepam	-	-	285.051	286.051	[M-H]-	C15H11ClN2O2	C07359	HMDB0014980	4616	735000
MW0154797	Oxaloglutarate	-	-	224.03	204.027	[M+F]-	C7H8O7	C05533	-	440718	404630
MW0139218	Osthole	-	-	245.116	244.11	[M+H]+	C15H16O3	C09280	-	10228	375730
MW0009280	Oryzalin	-	-	347.107	346.095	[M+H]+	C12H18N4O6S	C18877	-	29393	413250
MEDN0445	Orotidine	Nucleotide And Its metabolomics	Nucleotide and Its metabolomics	287.052	288.059	[M-H]-	C10H12N2O8	C01103	HMDB0000788	92751	98221
MW0108999	O-Phospho-L-threonine	-	-	243.995	199.025	[M-H+2Na]+	C4H10NO6P	-	HMDB0011185	1016	1136500
MW0125986	Ondansetron	-	-	294.165	293.153	[M+H]+	C18H19N3O	C07325	HMDB0005035	4595	137440
MW0154732	Oligomycin B	-	-	803.499	804.502	[M-H]-	C45H72O12	C11312	-	5281900	9
MEDP0574	Oleamide	Alcohol and amines	Amines	282.272	281.272	[M+H]+	C18H35NO	C19670	HMDB0002117	5283387	137310
MW0154705	O-Demethyl-N-demethyl-staurosporine;3'-O-Demethyl-4'-N-demethyl-staurosporine	-	-	502.188	438.169	[M+CH3CN+Na]+	C26H22N4O3	C21128	-	10983006	853460
MW0154702	Octopamine(p-Hydroxyphenylethanolamine)	-	-	217.1	153.079	[M+CH3CN+Na]+	C8H11NO2	-	-	4581	2258300
MEDN1566	Octadecanedioic acid	Organic acid And Its derivatives	Organic acid And Its derivatives	313.243	314.246	[M-H]-	C18H34O4	-	HMDB0000782	70095	27103
MEDN0682	Octadecanamide	Alcohol and amines	Amines	282.28	283.288	[M-H]-	C18H37NO	C13846	HMDB0034146	31292	47842
MW0154695	Octadec-9-ene-1,18-dioic-acid	-	-	295.227	312.23	[M+H-H2O]+	C18H32O4	C19618	-	9543674	570840
MW0108972	o-Cresol	-	-	107.05	108.058	[M-H]-	C7H8O	C01542	HMDB0002055	335	111430
MEDN0616	O-Acetyl-L-serine	Amino acid and Its metabolomics	Amino acid derivatives	146.045	147.053	[M-H]-	C5H9NO4	C00979	HMDB0003011	99478	290980
MW0108905	N-Phenylacetylphenylalanine	-	-	284.128	283.121	[M+H]+	C17H17NO3	-	HMDB0002372	47579	156520
MW0009181	N-Phenylacetyl pyroglutamic acid	-	-	244.097	1395.02	[M-H]-	C14H15NO3	-	HMDB0059782	124000000	378620
MW0169576	N-pentadecanoyl-L-Homoserine lactone	-	-	324.252	325.262	[M-H]-	C19H35NO3	-	-	68865575	20089
MEDN1410	N-Palmitoylglycine	Amino acid and Its metabolomics	Amino acid derivatives	312.256	313.262	[M-H]-	C18H35NO3	-	HMDB0013034	151008	73175
MW0125903	N-Oxyclozapine	-	-	343.13	342.125	[M+H]+	C18H19ClN4O	-	HMDB0060900	135000000	1950300
MW0125888	Nor-ketotifen	-	-	294.102	1366.99	[M-H]-	C18H17NOS	-	HMDB0060646	9904236	24733
MEDL01837	Nordihydrocapsiate	-	-	293.176	294.183	[M-H]-	C17H26O4	-	HMDB0034779	9817607	8636700
MW0000368	Norcodeine	-	-	284.129	285.137	[M-H]-	C17H19NO3	-	HMDB0060657	44357945	47425
MW0154594	Norbelladine	-	-	277.146	259.121	[M-H+NH3]-	C15H17NO3	C16701	-	416247	116730
MEDP1836	Nootkatone	Aldehyde,Ketones,Esters	Ketones	219.176	218.335	[M+H]+	C15H22O	C17914	-	1268142	38602
MEDL01879	Nootkatol	-	-	203.179	220.182	[M+H-H2O]+	C15H24O	-	HMDB0013688	182645	89614
MW0154586	Nomilin	-	-	532.253	514.22	[M+NH4]+	C28H34O9	C08773	HMDB0035772	72320	3512600
MW0125873	Nomifensine maleate	-	-	239.159	238.147	[M+H]+	C16H18N2	-	-	5358907	247680
MEDN1301	N-oleoyl-L-serine	Alcohol and amines	Amines	368.28	369.288	[M-H]-	C21H39NO4	-	-	-	182310
MW0169564	N-octanoyl-L-Homoserine lactone	-	-	228.16	227.152	[M+H]+	C12H21NO3	C21199	-	6914579	2636100
MW0111229	n-Octadecylamine	-	-	316.321	269.308	[M+HCOO+2H]+	C18H39N	-	HMDB0029586	15793	167490
MW0108859	N-Methyltryptophan	-	-	265.117	218.106	[M+HCOO+2H]+	C12H14N2O2	C02983	-	160511	221700
MEDP0248	N-Methylnicotinamide	CoEnzyme and vitamins	CoEnzyme and vitamins	137	136.064	[M+H]+	C7H8N2O	-	HMDB0003152	64950	120490
MEDN0837	N-Methyl-L-Glutamate	Amino acid and Its metabolomics	Amino acid derivatives	160.061	161.069	[M-H]-	C6H11NO4	C01046	HMDB0062660	439377	60690
MW0000359	N-Methylaspidospermatidine	-	-	279.186	1605.25	[M-H]-	C19H24N2	-	HMDB0030357	5372278	4749.4
MW0009118	N-Methylanthranilic acid	-	-	152.07	151.063	[M+H]+	C8H9NO2	C03005	HMDB0032609	67069	1130300
MEDP0868	N-Methylalanine	Amino acid and Its metabolomics	Amino acid derivatives	104.071	103.063	[M+H]+	C4H9NO2	-	HMDB0094692	5288725	75814
MW0108819	N-lactoyl-Tryptophan	-	-	275.106	1479.11	[M-H]-	C14H16N2O4	-	HMDB0062178	-	168610
MEDN0579	N-lactoyl-phenylalanine	Amino acid and Its metabolomics	Amino acid derivatives	236.092	237.1	[M-H]-	C12H15NO4	-	HMDB0062175	102199091	204940
MW0125835	Nizatidine	-	-	314.113	331.114	[M+H-H2O]+	C12H21N5O2S2	C07270	HMDB0014723	3033637	611100
MW0125806	Nigellimine N-oxide	-	-	218.078	1334.92	[M-H]-	C12H13NO3	-	HMDB0033436	-	5109400
MW0009084	Niflumic acid	-	-	346.072	282.062	[M+CH3CN+Na]+	C13H9F3N2O2	C13698	HMDB0015573	4488	8600800
MW0125801	Nifedipine	-	-	345.11	346.116	[M-H]-	C17H18N2O6	C07266	HMDB0015247	4485	122510
MEDP0247	Nicotinuric Acid	CoEnzyme and vitamins	CoEnzyme and vitamins	181.1	180.054	[M+H]+	C8H8N2O3	C05380	HMDB0003269	68499	71521
MEDP0245	Nicotinamide-N-Oxide	CoEnzyme and vitamins	CoEnzyme and vitamins	139	138.043	[M+H]+	C6H6N2O2	-	HMDB0002730	72661	201160
MEDP0242	Nicotinamide	CoEnzyme and vitamins	CoEnzyme and vitamins	123.1	122.1	[M+H]+	C6H6N2O	C00153	HMDB0001406	936	1459300
MW0009081	N-Hydroxy-N'-(4-butyl-2-methylphenyl)formamidine	-	-	207.148	206.142	[M+H]+	C12H18N2O	-	-	2727594	185660
MW0154482	N-Hydroxy-L-valine	-	-	267.156	133.074	[2M+H]+	C5H11NO3	C20313	-	22859864	347390
MW0154476	N-Hydroxy-IQ	-	-	213.077	214.085	[M-H]-	C11H10N4O	C20289	-	105079	40452
MW0115007	N-Glycolyl-Neuraminic acid	-	-	367.137	325.101	[M+CH3CN+H]+	C11H19NO10	C03410	HMDB0000833	440001	42293
MEDP1996	N-Formylglycine	Amino acid and Its metabolomics	Amino acids	104.034	103.027	[M+H]+	C3H5NO3	-	-	75606	5777300
MW0154445	Neurosporaxanthin;all-trans-Neurosporaxanthin	-	-	517.348	498.35	[M+F]-	C35H46O2	C08607	-	637039	9164.2
MW0108757	Nefiracetam	-	-	245.129	246.137	[M-H]-	C14H18N2O2	-	-	71157	21339
MW0108755	Necrosis Inhibitor, IM-54	-	-	324.178	325.179	[M-H]-	C19H23N3O2	-	-	16760577	778210
MW0169538	N-dodecanoyl-L-Homoserine lactone	-	-	282.206	283.215	[M-H]-	C16H29NO3	-	-	10221437	147330
MW0139124	N-Desmethyldroloxifene	-	-	372.199	373.204	[M-H]-	C25H27NO2	-	HMDB0142480	3035880	20106
MW0169537	N-decanoyl-L-Homoserine lactone	-	-	254.176	255.183	[M-H]-	C14H25NO3	-	-	10131281	80114
MW0108733	N-Cyclohexanecarbonyltetradecylamine	-	-	341.351	323.319	[M+NH4]+	C21H41NO	-	-	53394586	24439
MW0108729	N-cis-Tetradec-9-enoyl-L-homoserine lactone	-	-	310.237	309.23	[M+H]+	C18H31NO3	-	-	35028743	5540.7
MEDP0441	N-Caffeoyl Putrescine	Alcohol and amines	Amines	251.1	250.132	[M+H]+	C13H18N2O3	C03002	HMDB0029876	439877	42861
MW0108710	N-Butyryl-DL-homoserine lactone	-	-	213.124	171.089	[M+CH3CN+H]+	C8H13NO3	-	-	443433	1008600
MW0108704	N-Benzyloxycarbonyl-L-leucine	-	-	230.118	265.131	[M+H-2H2O]+	C14H19NO4	C04335	-	74840	809890
MW0125658	N-Benzyl-1-methyl-1H-pyrazolo[3,4-d]pyrimidin-4-amine	-	-	303.135	239.117	[M+CH3CN+Na]+	C13H13N5	-	-	219778	7461400
MEDP2049	N-Benzoyl-2'-deoxycytidine	Nucleotide And Its metabolomics	Nucleotide and Its metabolomics	332.125	331.117	[M+H]+	C16H17N3O5	-	-	9797617	761390
MW0108686	Nateglinide	-	-	316.19	317.199	[M-H]-	C19H27NO3	C12508	HMDB0014869	5311309	82355
MEDN0839	N-Alpha-Acetyl-L-Asparagine	Amino acid and Its metabolomics	Amino acid derivatives	173.056	174.064	[M-H]-	C6H10N2O4	-	HMDB0006028	99715	945290
MW0008809	N-Acetyltyramine	-	-	178.087	179.095	[M-H]-	C10H13NO2	-	-	121051	1611000
MW0114966	N-Acetylmuramoyl-Ala	-	-	345.126	364.148	[M-H-H2O]-	C14H24N2O9	C02999	HMDB0060494	5462248	9
MEDP0066	N-Acetyl-L-Tyrosine	Amino acid and Its metabolomics	Amino acid derivatives	224.1	223.085	[M+H]+	C11H13NO4	C01657	HMDB0000866	68310	70168
MEDN0075	N-Acetyl-L-phenylalanine	Amino acid and Its metabolomics	Amino acid derivatives	206.082	207.1	[M-H]-	C11H13NO3	C03519	HMDB0000512	74839	346290
MEDN0056	N-Acetyl-L-Leucine	Amino acid and Its metabolomics	Amino acid derivatives	172.097	173.105	[M-H]-	C8H15NO3	C02710	HMDB0011756	70912	446530
MEDP0089	N-Acetylhistamine	Alcohol and amines	Amines	154.1	153.1	[M+H]+	C7H11N3O	C05135	HMDB0013253	69602	145060
MEDP0373	N-Acetylglycine	Amino acid and Its metabolomics	Amino acid derivatives	118	117.043	[M+H]+	C4H7NO3	-	HMDB0000532	10972	107480
MW0108623	N-Acetylglucosaminylasparagine	-	-	316.116	335.133	[M-H2O-H]-	C12H21N3O8	C04540	HMDB0000489	123826	1005200
MEDN0235	N-Acetyl-D-Glucosamine	Carboxylic acids and derivatives	Sugar derivatives	220.082	221.09	[M-H]-	C8H15NO6	C00140	HMDB0000215	439174	336130
MW0154199	N-Acetylaspartylglutamylglutamate;N-Acetyl-L-aspartyl-L-glutamyl-L-glutamate;NAAG2	-	-	485.134	433.133	[M+Cl+NH3]-	C16H23N3O11	C20776	-	72715763	418470
MEDN0053	N-Acetylaspartate	Amino acid and Its metabolomics	Amino acid derivatives	174.04	175.048	[M-H]-	C6H9NO5	C01042	HMDB0000812	65065	163520
MEDP1493	N6-methyladenosine	Nucleotide And Its metabolomics	Nucleotide and Its metabolomics	282	281.112	[M+H]+	C11H15N5O4	-	HMDB0004044	102175	1210200
MEDP1789	N6-methyl-2'-deoxyadenosine	Nucleotide And Its metabolomics	Nucleotide and Its metabolomics	266.125	265.117	[M+H]+	C11H15N5O3	C03795	-	168948	283480
MEDP1991	N6-Isopentenyladenosine	Nucleotide And Its metabolomics	Nucleotide and Its metabolomics	336.167	335.159	[M+H]+	C15H21N5O4	-	-	24405	10646000
MEDN1076	N6-isopentene adenine	Nucleotide And Its metabolomics	Nucleotide and Its metabolomics	202.109	203.117	[M-H]-	C10H13N5	-	-	92180	157340
MW0125613	N6-cis-p-Coumaroylserotonin	-	-	357.106	1395.02	[M+Cl]-	C19H18N2O3	-	HMDB0038340	5458879	304020
MW0154176	N6-Acetyl-N6-hydroxy-L-lysine;N6-Acetyl-N6-hydroxylysine	-	-	256.115	204.111	[M+Cl+NH3]-	C8H16N2O4	C03955	-	128888	50076
MEDP0062	N6-Acetyl-L-Lysine	Amino acid and Its metabolomics	Amino acid derivatives	189.116	188.116	[M+H]+	C8H16N2O3	C02727	HMDB0000206	92832	9
MW0108588	N5-(1-Iminobutyl)-L-ornithine	-	-	224.139	201.148	[M+Na]+	C9H19N3O2	-	-	5289555	176380
MW0008784	N4-Acetylsulfadimidine	-	-	319.092	320.094	[M-H]-	C14H16N4O3S	-	-	66855	8117900
MEDP1788	N4-Acetylcytidine triphosphate	Nucleotide And Its metabolomics	Nucleotide and Its metabolomics	526.431	524.995	[M+H]+	C11H18N3O15P3	-	-	90117875	1831200
MW0108579	N-3-Hydroxyoctanoyl-L-homoserine lactone	-	-	244.155	243.147	[M+H]+	C12H21NO4	C21200	-	66769741	89777
MW0108562	N2-(1-Oxo-4-phenylbutyl)-L-glutamine	-	-	273.112	292.142	[M-H2O-H]-	C15H20N2O4	-	HMDB0011687	9943917	125330
MW0108561	N2-(1-Carboxyethyl)-L-arginine	-	-	493.281	246.133	[2M+H]+	C9H18N4O4	C04137	-	440237	9
MW0154141	N1-Acetyl-tabtoxinine-beta-lactam	-	-	282.088	230.09	[M+Cl+NH3]-	C9H14N2O5	C20921	-	92042784	778190
MW0125586	N1-(2-Hydroxyethyl)flurazepam	-	-	333.079	332.073	[M+H]+	C17H14ClFN2O2	-	HMDB0060853	30401	78389
MW0008725	N-[4-[(4-Propan-2-yloxyphenyl)methyl]phenyl]-4,5-dihydro-1H-imidazol-2-amine	-	-	310.186	309.184	[M+H]+	C19H23N3O	-	-	9839644	226210
MW0108519	N-[(Phenylmethoxy)carbonyl]-L-leucyl-N-[(1S)-1-formyl-3-methylbutyl]-D-leucinamide	-	-	476.31	475.305	[M+H]+	C26H41N3O5	-	-	45103781	2926800
MW0108503	N,N-Dimethyl-L-histidine	-	-	405.162	183.101	[2M+K]+	C8H13N3O2	C04259	-	440274	1252000
MEDP0061	N,N-Dimethylglycine	Amino acid and Its metabolomics	Amino acid derivatives	104.071	103.063	[M+H]+	C4H9NO2	C01026	HMDB0000092	673	75814
MW0111163	N,N-Dimethylaniline	-	-	243.185	121.089	[2M+H]+	C8H11N	C02846	HMDB0001020	949	9
MEDN1125	N,N′-dicyclohexylcarbodiimide	Alcohol and amines	Polyamines	205.17	206.178	[M-H]-	C13H22N2	-	-	10868	4933900
MW0108474	N-(N-Formyl-L-methionyl)-L-phenylalanine	-	-	323.11	324.114	[M-H]-	C15H20N2O4S	-	-	119446	614630
MW0125466	N-(Furan-2-ylmethyl)formamide	-	-	108.043	125.048	[M+H-H2O]+	C6H7NO2	C02854	-	194461	305850
MEDP1913	N(Alpha)-Acetyl-Epsilon-(2-Propenal)Lysine	Amino acid and Its metabolomics	Small Peptide	243.13	242.127	[M+H]+	C11H18N2O4	-	-	6438822	302880
MW0108457	N(6)-Methyllysine	-	-	229.116	160.121	[M+Na+HCOOH]+	C7H16N2O2	C02728	HMDB0002038	164795	151170
MW0154070	N''-(4-Fluorophenyl)-N-hydroxyguanidine	-	-	170.072	169.065	[M+H]+	C7H8FN3O	-	-	10867459	278690
MW0139071	N-(4-aminobutyl)-3-(4-hydroxyphenyl)prop-2-enimidic acid	-	-	255.115	234.137	[M-2H+Na]-	C13H18N2O2	C18326	HMDB0033461	6439562	46220
MEDP1962	N-(3-Indolylacetyl)-L-alanine	Amino acid and Its metabolomics	Amino acid derivatives	247.108	246.1	[M+H]+	C13H14N2O3	-	-	-	56940
MW0125345	N-(2-Phenylethyl)indomethacinamide	-	-	461.163	460.155	[M+H]+	C27H25ClN2O3	-	-	4292	68106
MW0154055	N-(2-Methylpropyl)hexa-2,4-dienamide	-	-	168.138	167.131	[M+H]+	C10H17NO	-	-	71375318	115330
MEDP1040	N-(2-hydroxyethyl)stearamide	Alcohol and amines	Amines	328.319	327.314	[M+H]+	C20H41NO2	-	-	27902	9921.5
MW0108363	N-(13-Methyltetradecyl)acetamide	-	-	270.278	269.272	[M+H]+	C17H35NO	C17515	HMDB0040940	47346	73611
MW0055182	Myristoleic acid	-	-	209.189	226.193	[M+H-H2O]+	C14H26O2	C08322	HMDB0002000	5281119	98722
MEDP1360	Mycosporine glycine	Amino acid and Its metabolomics	Amino acid derivatives	246.1	245.09	[M+H]+	C10H15NO6	-	-	14444486	115030
MW0114889	Muscone	-	-	280.264	238.23	[M+CH3CN+H]+	C16H30O	-	HMDB0034181	10947	430660
MW0125236	Murrayacinine	-	-	344.168	1465.1	[M-H]-	C23H23NO2	-	HMDB0030224	102000000	53899
MEDN1183	Multifidol	Benzene and substituted derivatives	Phenolics	209.081	210.089	[M-H]-	C11H14O4	C10709	-	12892	30343
MEDL02641	Moracin M	-	-	241.048	242.058	[M-H]-	C14H10O4	-	HMDB0033307	185848	1938100
MW0108345	Monoethylglycinexylidide	-	-	229.133	206.142	[M+Na]+	C12H18N2O	C16561	HMDB0060656	24415	242930
MW0153950	Monocerin	-	-	307.113	308.126	[M-H]-	C16H20O6	C09953	-	92267	104520
MW0125198	Molinate	-	-	188.104	187.103	[M+H]+	C9H17NOS	C11086	-	16653	2756200
MW0125188	Mirtazapine	-	-	264.157	265.158	[M-H]-	C17H19N3	C07570	HMDB0014514	4205	432900
MW0153924	Mirasan	-	-	239.129	240.139	[M-H]-	C13H21ClN2	C11716	-	75648	1098100
MW0153923	Mipafox	-	-	181.097	182.098	[M-H]-	C6H16FN2OP	C19008	-	9738	256360
MW0108335	Midazolam	-	-	367.118	325.078	[M+CH3CN+H]+	C18H13ClFN3	C07524	HMDB0014821	4192	79896
MEDP1097	MG(18:2/0:0/0:0)	GL	MG	355	354.277	[M+H]+	C21H38O4	-	-	5365676	22606
MEDP1448	MG(18:0/0:0/0:0)	GL	MG	359.3	359.316	[M+H]+	C21H42O4	-	-	-	35621
MW0055015	MG(15:0/0:0/0:0)	-	-	337.235	764.689	[M-2H+Na]-	C18H36O4	-	HMDB0011563	46879024	7683500
MW0055011	MG(12:0/0:0/0:0)	-	-	255.196	274.214	[M-H-H2O]-	C15H30O4	-	HMDB0072863	71598538	47609
MW0054984	MG(0:0/22:0/0:0)	-	-	461.373	708.627	[M+H+HCOOH]+	C25H50O4	-	HMDB0011551	121658	185000
MW0007806	Metoxuron	-	-	275.077	228.067	[M+HCOO+2H]+	C10H13ClN2O2	C11011	-	29863	112700
MW0007800	Metolachlor	-	-	567.269	283.134	[2M+H]+	C15H22ClNO2	C10953	-	4169	265110
MEDN0748	Methylparaben	Benzene and substituted derivatives	Phenolic acids	151.04	152.047	[M-H]-	C8H8O3	-	HMDB0032572	7456	44371
MEDP0685	Methylcysteine	Amino acid and Its metabolomics	Amino acids	136.2	135.035	[M+H]+	C4H9NO2S	-	HMDB0002108	24417	11946000
MEDP1178	Methylamine	Alcohol and amines	Amines	141.1	140.106	[M+H]+	C6H12N4	C00218	HMDB0000164	6329	1675700
MW0153825	Methyl-2-alpha-L-fucopyranosyl-beta-D-galactoside	-	-	425.106	340.137	[M+K+HCOOH]+	C13H24O10	C04698	-	440446	38811
MW0054906	Methyl octanoate	-	-	205.142	158.131	[M+HCOO+2H]+	C9H18O2	-	HMDB0031291	8091	703630
MW0054902	Methyl myristoleate	-	-	287.221	240.209	[M+HCOO+2H]+	C15H28O2	-	-	5352674	59378
MW0108274	Methyl hippurate	-	-	176.07	193.074	[M+H-H2O]+	C10H11NO3	-	HMDB0000859	14566	1637900
MW0153812	Methyl gibberellin A4	-	-	398.172	346.178	[M+Cl+NH3]-	C20H26O5	C20633	-	72734315	89182
MW0153811	Methyl farnesoate;Methyl(2E,6E)-farnesoate	-	-	268.227	250.193	[M+NH4]+	C16H26O2	C16503	-	5275508	357590
MEDL01878	Methyl dioxindole-3-acetate	-	-	222.075	221.068	[M+H]+	C11H11NO4	-	HMDB0038991	14033762	3720800
MW0054879	Methyl decanoate	-	-	169.158	186.162	[M+H-H2O]+	C11H22O2	-	HMDB0033848	8050	283530
MEDL02277	Methyl Anthranilate	-	-	325.118	151.063	[2M+Na]+	C8H9NO2	C20634	HMDB0029703	8635	43962
MW0108242	Methyl (2S)-2-[[(E)-3-(3,4-dihydroxyphenyl)prop-2-enoyl]amino]propanoate	-	-	264.091	265.095	[M-H]-	C13H15NO5	-	-	23659588	48317
MW0161548	methyl (1R,2R,5S,8S,9S,10R,11S)-5-hydroxy-11-methyl-6-methylidene-16-oxo-15-oxapentacyclo[9.3.2.15,8.01,10.02,8]heptadecane-9-carboxylate	-	-	327.152	346.178	[M-H-H2O]-	C20H26O5	-	-	14258556	274020
MW0108217	Methionyl-Arginine	-	-	306.155	1451.08	[M+H]+	C11H23N5O3S	-	HMDB0028967	25216498	30160
MW0124921	Methanone, [1-(3-fluoropentyl)-1H-indol-3-yl]-1-naphthalenyl-	-	-	382.166	359.168	[M+Na]+	C24H22FNO	-	-	91713121	24040
MEDN0741	Methanesulfonic acid	Organic acid And Its derivatives	Sulfonic acids	94.9803	95.9881	[M-H]-	CH4O3S	C11145	-	6395	1340600
MW0124798	Metamizole	-	-	310.091	311.094	[M-H]-	C13H17N3O4S	D08188	-	3111	99810
MW0108189	Metalaxyl	-	-	343.167	279.147	[M+CH3CN+Na]+	C15H21NO4	C10947	HMDB0031802	42586	97457
MW0153593	Met Leu Asn	-	-	377.184	376.178	[M+H]+	C15H28N4O5S1	-	-	-	29484
MW0124783	Mephenytoin	-	-	282.122	218.106	[M+CH3CN+Na]+	C12H14N2O2	D00375	HMDB0014673	4060	4296400
MW0007582	Menadione	-	-	207.022	172.052	[M+Cl]-	C11H8O2	C05377	HMDB0001892	4055	94642
MW0111083	Memantine	-	-	226.18	179.167	[M+HCOO+2H]+	C12H21N	C13736	HMDB0015177	4054	913150
MW0108132	Melphalan	-	-	303.072	304.075	[M-H]-	C13H18Cl2N2O2	C07122	HMDB0015176	460612	50254
MW0138918	Melilotocarpan B	-	-	305.081	286.084	[M+F]-	C16H14O5	-	HMDB0029527	23259931	3752100
MW0007578	Melamine	-	-	149.058	126.065	[M+Na]+	C3H6N6	C08737	HMDB0041922	7955	2016000
MW0007574	Mefenorex	-	-	250.078	211.113	[M+K]+	C12H18ClN	D07891	-	21777	267560
MEDL01764	Maritimetin	-	-	285.033	286.048	[M-H]-	C15H10O6	C08720	HMDB0029711	5281292	336050
MEDN0333	Malonicacid	Organic acid And Its derivatives	Organic acid And Its derivatives	103.003	104.011	[M-H]-	C3H4O4	C00383	HMDB0000691	867	858260
MEDP0325	Maleic Acid	Organic acid And Its derivatives	Organic acid And Its derivatives	117.011	116.011	[M+H]+	C4H4O4	C01384	HMDB0000176	444266	9
MW0054659	Malaoxon	-	-	315.068	314.059	[M+H]+	C10H19O7PS	C07498	HMDB0060627	15415	94943
MW0000328	Magnoflorine	-	-	377.138	342.17	[M+Cl]-	[C20H24NO4]+	C09581	-	73337	206360
MW0153298	Maculosin;Cyclo(L-Pro-L-Tyr)	-	-	259.109	260.116	[M-H]-	C14H16N2O3	C10605	-	119404	201510
MW0153225	Lys-HoPhe-OH	-	-	414.166	415.174	[M-H]-	C21H25N3O6	-	-	-	1143500
MW0153218	Lys-Asn-OH	-	-	367.128	368.133	[M-H]-	C15H20N4O7	-	-	-	571110
MW0153076	Lys Met His	-	-	846.444	414.205	[2M+NH4]+	C17H30N6O4S1	-	-	-	7413600
MW0153048	Lys Leu Thr Arg	-	-	517.354	516.338	[M+H]+	C22H44N8O6	-	-	-	52283
MW0152925	Lys Cys His	-	-	790.381	386.174	[2M+NH4]+	C15H26N6O4S1	-	-	-	9
MW0152882	Lys Asn Glu	-	-	431.229	389.191	[M+CH3CN+H]+	C15H27N5O7	-	-	-	1158000
MW0152872	Lys Arg Ser	-	-	390.247	389.239	[M+H]+	C15H31N7O5	-	-	-	142960
MEDN0789	LXB4	FA	Oxidized lipids	351.217	352.225	[M-H]-	C20H32O5	C06315	HMDB0005082	5280915	28938
MW0000323	Lupanine; (1R,2R,9S,10S)-7,15-Diazatetracyclo[7.7.1.02,7.010,15]heptadecan-6-one	-	-	267.196	248.189	[M+F]-	C15H24N2O	C10772	-	442956	559770
MEDP0009	L-Tyrosine	Amino acid and Its metabolomics	Amino acids	182.1	181.074	[M+H]+	C9H11NO3	C00082	HMDB0000158	6057	60965
MEDP0024	L-Serine	Amino acid and Its metabolomics	Amino acids	106	105.043	[M+H]+	C3H7NO3	C00065	HMDB0000187	5951	269930
MW0152778	L-Rhamnulose 1-phosphate	-	-	331.002	244.035	[M+K+HCOOH]+	C6H13O8P	C01131	-	6451998	461200
MEDN0356	LPS(22:6/0:0)	GP	LPS	568.268	569.275	[M-H]-	C28H44NO9P	-	-	-	162070
MEDP0022	L-Proline	Amino acid and Its metabolomics	Amino acids	116.1	115.063	[M+H]+	C5H9NO2	C00148	HMDB0000162	145742	62830
MEDP0021	L-Phenylalanine	Amino acid and Its metabolomics	Amino acids	166.085	165.079	[M+H]+	C9H11NO2	C00079	HMDB0000159	6140	9343200
MEDN0362	LPE(18:1/0:0)	GP	LPE	478.293	479.301	[M-H]-	C23H46NO7P	-	HMDB0011506	53480949	291550
MEDP1160	LPE(18:1/ 0:0)	-	-	480.307	479.301	[M+H]+	C23H46NO7P	-	-	-	297780
MEDN0364	LPE(18:0/0:0)	GP	LPE	480.309	481.317	[M-H]-	C23H48NO7P	-	HMDB0011130	9547068	66892
MEDP1875	LPE(17:1/0:0)	GP	LPE	466.285	465.286	[M+H]+	C22H44NO7P	-	-	42607464	266260
MEDN0366	LPE(16:0/0:0)	GP	LPE	452.278	453.286	[M-H]-	C21H44NO7P	-	-	-	751650
MEDP1686	LPE(15:0/0:0)	GP	LPC	440.277	439.27	[M+H]+	C20H42NO7P	-	HMDB0011502	52925150	7093.2
MEDN0368	LPE(14:0/0:0)	GP	LPE	424.246	425.254	[M-H]-	C19H40NO7P	-	-	-	10413
MEDN1279	LPE(0:0/18:0)	GP	LPE	480.309	481.317	[M-H]-	C23H48NO7P	-	-	-	66892
MEDN1287	LPE(0:0/16:1)	GP	LPE	450.264	451.27	[M-H]-	C21H42NO7P	-	-	-	9
MEDN1285	LPE(0:0/16:0)	GP	LPE	452.278	453.286	[M-H]-	C21H44NO7P	-	-	-	751650
MEDP0537	LPC(O-16:0/2:0)	GP	LPC	524.36	523.364	[M+H]+	C26H54NO7P	-	HMDB0062195	108156	1081600
MEDP1337	LPC(18:0/0:0)	GP	LPC	524.363	523.364	[M+H]+	C26H54NO7P	-	HMDB0010384	497299	157720
MEDP0434	LPC(17:0/0:0)	GP	LPC	510.1	509.348	[M+H]+	C25H52NO7P	-	HMDB0012108	24779463	7657600
MEDP0338	LPC(16:0/0:0)	GP	LPC	496.33	495.332	[M+H]+	C24H50NO7P	-	HMDB0010382	460602	62975
MEDP0494	LPC(15:0/0:0)	GP	LPC	482.3	481.317	[M+H]+	C23H48NO7P	-	HMDB0010381	-	56589
MEDP1700	LPC(0:0/18:0)	GP	LPC	524.363	523.364	[M+H]+	C26H54NO7P	-	-	-	700580
MEDP1691	LPC(0:0/17:0)	GP	LPC	510.353	509.348	[M+H]+	C25H52NO7P	-	-	-	6685700
MEDP1346	LPC(0:0/16:0)	GP	LPC	496.331	495.332	[M+H]+	C24H50NO7P	-	-	-	98658
MEDP1692	LPC(0:0/15:0)	GP	LPC	482.322	481.317	[M+H]+	C23H48NO7P	-	-	-	27634
MW0138813	Loxoprofen	-	-	247.133	246.126	[M+H]+	C15H18O3	D08149	HMDB0041920	3965	166720
MW0107932	Lovastatin hydroxy acid	-	-	405.26	422.267	[M+H-H2O]+	C24H38O6	C21130	-	64727	9
MEDP0012	L-Ornithine	Amino acid and Its metabolomics	Amino acids	133	168.067	[M-Cl]+	C5H13ClN2O2	C00077	HMDB0000214	6262	9180.2
MW0152758	Lophocerine	-	-	250.176	249.173	[M+H]+	C15H23NO2	C09571	-	442313	41543
MW0152739	Lochnerinine	-	-	421.161	382.189	[M+K]+	C22H26N2O4	C11812	-	443417	218430
MW0114753	Lobeline	-	-	356.205	337.204	[M+F]-	C22H27NO2	C07475	-	3945	179280
MEDP0519	L-Norleucine	Amino acid and Its metabolomics	Amino acids	132.102	131.095	[M+H]+	C6H13NO2	C01933	HMDB0001645	6334	1038700
MW0152732	L-N2-(2-Carboxyethyl)arginine;N2-(2-Carboxyethyl)-L-arginine	-	-	298.126	246.133	[M+Cl+NH3]-	C9H18N4O4	C06655	-	446475	161200
MEDP0884	L-Methionine Sulfoximine	Amino acid and Its metabolomics	Amino acid derivatives	181.3	180.057	[M+H]+	C5H12N2O3S	C03510	HMDB0029430	16118	94759
MEDP1777	L-Methionine sulfoxide	Amino acid and Its metabolomics	Amino acid derivatives	166.053	165.046	[M+H]+	C5H11NO3S	-	HMDB0002005	158980	7428.5
MW0054401	L-Menthyl(R,S)-3-hydroxybutyrate	-	-	241.18	1493.13	[M-H]-	C14H26O3	-	HMDB0032370	10220444	63949
MW0114747	L-Lyxonate;L-Lyxonic acid	-	-	165.041	166.048	[M-H]-	C5H10O6	C05412	HMDB0060255	644110	672220
MEDP0011	L-Lysine	Amino acid and Its metabolomics	Amino acids	147	146.106	[M+H]+	C6H14N2O2	C00047	HMDB0000182	5962	24273
MW0107891	Lisinopril	-	-	406.233	405.226	[M+H]+	C21H31N3O5	D08131	HMDB0001938	5362119	627290
MW0007503	Lidocaine	-	-	235.18	234.173	[M+H]+	C14H22N2O	C07073	HMDB0014426	3676	10249000
MEDP0322	L-Homoserine	Organic acid And Its derivatives	Organic acid And Its derivatives	120.1	119.058	[M+H]+	C4H9NO3	C00263	HMDB0000719	12647	44590
MEDP0017	L-Histidine	Amino acid and Its metabolomics	Amino acids	156.1	155.07	[M+H]+	C6H9N3O2	C00135	HMDB0000177	6274	108990
MEDP0016	L-Glutamic Acid	Amino acid and Its metabolomics	Amino acids	148.1	147.053	[M+H]+	C5H9NO4	C00025	HMDB0000148	33032	44869
MEDP1937	Leu-Leu	Amino acid and Its metabolomics	Small Peptide	245.18	245.186	[M+H]+	C12H24N2O3	-	-	-	25706
MW0152600	Leu-Gln	-	-	242.149	259.153	[M+H-H2O]+	C11H21N3O4	-	HMDB0028927	-	28980
MEDP1773	Leucyl-phenylalanine	Amino acid and Its metabolomics	Small Peptide	279.171	278.163	[M+H]+	C15H22N2O3	-	HMDB0013243	6992310	94270
MEDP1776	Leu-Ala	Amino acid and Its metabolomics	Small Peptide	203.14	202.132	[M+H]+	C9H18N2O3	-	HMDB0028922	81721	24040
MW0152451	Leu Phe Ile Asp	-	-	507.274	506.274	[M+H]+	C25H38N4O7	-	-	-	1569700
MW0168274	Leu Leu Tyr	-	-	471.26	407.242	[M+CH3CN+Na]+	C21H33N3O5	-	-	4584009	198580
MW0152375	Leu Ile Glu Glu	-	-	503.267	502.264	[M+H]+	C22H38N4O9	-	-	-	2040100
MW0152242	Leu Asn Arg Glu	-	-	529.272	530.281	[M-H]-	C21H38N8O8	-	-	-	4032900
MW0152231	Leu Arg Pro Thr Leu	-	-	599.393	598.38	[M+H]+	C27H50N8O7	-	-	-	38983
MW0054311	Leptomycin B	-	-	539.331	540.345	[M-H]-	C33H48O6	-	-	71684517	25740
MW0007483	Leflunomide	-	-	269.058	270.062	[M-H]-	C12H9F3N2O2	C07905	HMDB0015229	3899	486650
MEDP0321	L-Dihydroorotic Acid	Organic acid And Its derivatives	Organic acid And Its derivatives	159	158.033	[M+H]+	C5H6N2O4	C00337	HMDB0003349	439216	7166900
MEDP0052	L-Cysteine	Amino acid and Its metabolomics	Amino acids	122.02	121.02	[M+H]+	C3H7NO2S	C00097	HMDB0000574	5862	87711000
MW0054299	L-Canavanine	-	-	391.144	176.091	[2M+K]+	C5H12N4O3	C00308	HMDB0002706	439202	861550
MW0054298	L-Bornyl acetate	-	-	214.178	196.146	[M+NH4]+	C12H20O2	-	HMDB0040397	93009	57622
MW0152160	L-beta-Phenylalanine;(R)-3-Amino-3-phenylpropanoate	-	-	164.071	165.079	[M-H]-	C9H11NO2	C20487	-	686703	213690
MEDP0014	L-Aspartic Acid	Amino acid and Its metabolomics	Amino acids	134.1	133.038	[M+H]+	C4H7NO4	C00049	HMDB0000191	5960	61505
MW0152140	L-Asp(4-L-Arg)	-	-	324.106	289.139	[M+Cl]-	C10H19N5O5	C19843	-	44602459	1553000
MEDP0239	L-Ascorbate	CoEnzyme and vitamins	CoEnzyme and vitamins	177	176.032	[M+H]+	C6H8O6	C00072	HMDB0000044	54670067	69040000
MW0152130	L-Arogenate;L-Arogenic acid;Pretyrosine	-	-	246.074	227.079	[M+F]-	C10H13NO5	C00826	-	439319	1249100
MW0152084	L-Alanyl-D-glutamate	-	-	265.107	218.09	[M+H+HCOOH]+	C8H14N2O5	C20957	-	14534790	9
MW0054266	Lagocholic acid	-	-	431.277	408.288	[M+Na]+	C24H40O5	C04661	-	440427	1361300
MW0007471	Labetalol	-	-	311.175	328.179	[M+H-H2O]+	C19H24N2O3	C07063	HMDB0014736	3869	223470
MW0152066	L-2-Methyltryptophan;2-Methyl-L-tryptophan	-	-	270.096	218.106	[M+Cl+NH3]-	C12H14N2O2	C16831	-	12991541	15251
MEDP1617	L-(+)-Gulose	-	-	203.051	180.063	[M+Na]+	C6H12O6	C15923	-	10130220	207100
MW0054215	Kirenol	-	-	303.232	338.246	[M+H-2H2O]+	C20H34O4	-	-	15736732	246150
MW0152029	Kikkanol D	-	-	270.207	254.188	[M+NH4-2H]-	C15H26O3	C17606	-	10332558	334880
MW0152026	Kikkanol A	-	-	253.181	254.188	[M-H]-	C15H26O3	C17603	-	10706137	177170
MW0007462	Ketoprofen β-D-glucuronide	-	-	429.116	430.126	[M-H]-	C22H22O9	-	HMDB0010334	131281	320480
MW0152010	Kaur-16-en-18-al;(-)-Kaur-16-en-18-al;4alpha-Kaur-16-en-18-al;Kaurenal;ent-Kaurenal;ent-Kaur-16-en-19-al	-	-	323.182	286.23	[M-2H+K]-	C20H30O	C11873	HMDB0036728	443466	61390
MW0151990	Kalkitoxin thioamide alcohol	-	-	385.292	384.281	[M+H]+	C21H40N2O2S	-	-	-	1106400
MW0138628	Kaempferol 3-glucoside 7-rhamnoside	-	-	595.158	594.159	[M+H]+	C27H30O15	-	HMDB0037426	21606527	1791900
MW0151969	JWH 250 N-(5-carboxyxypentyl) metabolite	-	-	366.168	365.163	[M+H]+	C22H23NO4	-	-	-	57224
MW0151966	JWH 210 N-(5-carboxypentyl) metabolite	-	-	398.174	399.183	[M-H]-	C26H25NO3	-	-	-	136670
MW0124568	JWH 073 7-hydroxyindole metabolite	-	-	342.152	343.157	[M-H]-	C23H21NO2	-	-	53394455	242480
MW0151948	JWH 073 2-hydroxyindole	-	-	342.146	343.157	[M-H]-	C23H21NO2	-	-	-	40738
MW0151929	Juvenile hormone III acid;Juvenile-hormone-III carboxylate;(2E,6E,10R)-10,11-Epoxy-3,7,11-trimethyldodeca-2,6-dienoate	-	-	294.21	252.173	[M+CH3CN+H]+	C15H24O3	C16504	-	23724771	1788700
MW0151924	Juvenile hormone I acid;(2E,6E,10R,11S)-10,11-Epoxy-7-ethyl-3,11-dimethyl-2,6-tridecadienoate	-	-	325.176	280.204	[M-H+2Na]+	C17H28O3	C20992	-	87975091	63530
MEDP1770	Jasmone	Aldehyde,Ketones,Esters	Ketones	165.128	164.12	[M+H]+	C11H16O	C08490	HMDB0035601	1549018	438230
MW0151908	Jasminine	-	-	219.077	220.085	[M-H]-	C11H12N2O3	C09985	-	442551	82805
MW0151902	Jadomycin A;Jadomycin B aglycon	-	-	459.157	419.137	[M-H+CH3CN]-	C24H21NO6	C18680	-	12160163	91654
MW0124523	I-Urobilin	-	-	571.282	332.092	[M-H-H2O]-	C33H42N4O6	-	HMDB0004160	5795125	133660
MEDL01829	Isothankunic acid	-	-	469.329	504.346	[M+H-2H2O]+	C30H48O6	-	HMDB0040772	12302703	9
MW0151871	Isotabtoxin;delta-Tabtoxin	-	-	312.112	289.127	[M+Na]+	C11H19N3O6	C20919	-	14586819	3452000
MEDP1614	Isopentenyl pyrophosphate	-	-	515.006	246.006	[2M+Na]+	C5H12O7P2	C00129	HMDB0001347	1195	37853
MW0124485	Isonicotinamide	-	-	121.044	122.048	[M-H]-	C6H6N2O	C02421	-	15074	14780000
MW0054103	Isomasticadienonalic acid	-	-	467.316	1338.96	[M-H]-	C30H44O4	-	HMDB0035434	132000000	12222
MW0107568	Isoleucyl-Leucine	-	-	227.175	1535.18	[M+H-H2O]+	C12H24N2O3	-	HMDB0028911	7019083	5270300
MW0151783	Isoandrocymbine	-	-	392.167	371.173	[M-2H+Na]-	C21H25NO5	C16708	-	46173814	86436
MW0054039	Isoalantolactone	-	-	487.287	232.146	[2M+Na]+	C15H20O2	C09484	HMDB0035934	73285	7533.4
MEDN1554	Isethionic acid	Organic acid And Its derivatives	Sulfonic acids	124.996	125.999	[M-H]-	C2H6O4S	C05123	HMDB0003903	7866	9264.9
MW0151771	Iridotrial;(1S,2R,3S)-2-Formyl-alpha-(hydroxymethylene)-3-methylcyclopentaneacetaldehyde	-	-	207.092	182.094	[M+Na]+	C10H14O3	C06070	-	53297344	216230
MW0054021	Ingenol	-	-	349.204	348.194	[M+H]+	C20H28O5	C09112	-	442042	9
MW0124434	Indoramin	-	-	386.163	347.2	[M+K]+	C22H25N3O	D04531	-	33625	1023600
MW0138441	Indoprofen	-	-	328.117	281.105	[M+HCOO+2H]+	C17H15NO3	D04530	-	3718	100720
MEDP1063	Indole-5-carboxylic acid	Heterocyclic compounds	Indole and Its derivatives	162.045	161.048	[M+H]+	C9H7NO2	-	-	74280	11489000
MEDN0848	Indole-3-Ethanol	Benzene and substituted derivatives	Benzene and substituted derivatives	160.076	161.084	[M-H]-	C10H11NO	C00955	HMDB0003447	10685	91377
MEDP0276	Indole-3-Carboxaldehyde	Heterocyclic compounds	Indole and Its derivatives	146.1	145.053	[M+H]+	C9H7NO	C08493	HMDB0029737	10256	3683700
MEDN0562	Indole-3-carbinol	Heterocyclic compounds	Indole and Its derivatives	146.061	147.068	[M-H]-	C9H9NO	-	HMDB0005785	-	1019500
MEDP0275	Indole-3-Acetic Acid	Heterocyclic compounds	Indole and Its derivatives	176.1	175.063	[M+H]+	C10H9NO2	C00954	HMDB0000197	802	208380
MEDN0265	Indole-2-Carboxylic Acid	Heterocyclic compounds	Indole and Its derivatives	160.04	161.048	[M-H]-	C9H7NO2	-	HMDB0002285	72899	24366
MW0124406	Indole-2,3-diol	-	-	132.043	149.048	[M+H-H2O]+	C8H7NO2	C02775	-	21860	1049100
MEDP0453	Indole	Heterocyclic compounds	Indole and Its derivatives	118	117.058	[M+H]+	C8H7N	C00463	HMDB0000738	798	75992
MW0007369	Imipramine	-	-	281.2	280.194	[M+H]+	C19H24N2	C07049	HMDB0001848	3696	79284
MEDN1056	Iminodiacetic acid	Organic acid And Its derivatives	Organic acid And Its derivatives	132.03	133.037	[M-H]-	C4H7NO4	C19911	HMDB0011753	8897	14452
MEDP0425	Imidazoleacetic acid	Heterocyclic compounds	Indole and Its derivatives	127.1	126.043	[M+H]+	C5H6N2O2	C02835	HMDB0002024	96215	49082
MW0124373	Imazaquin	-	-	312.134	311.127	[M+H]+	C17H17N3O3	C05076	-	54739	184750
MW0007363	Imazamethabenz-methyl	-	-	287.143	288.147	[M-H]-	C16H20N2O3	C11494	HMDB0034913	54744	126400
MW0151553	Ile Phe Val Lys	-	-	504.322	505.326	[M-H]-	C26H43N5O5	-	-	-	170670
MW0107448	Ile Leu Asn	-	-	341.219	358.222	[M+H-H2O]+	C16H30N4O5	-	-	-	792680
MW0107441	Ile His	-	-	251.15	268.154	[M+H-H2O]+	C12H20N4O3	-	-	-	712170
MW0151318	Ile Ala Trp	-	-	389.218	388.211	[M+H]+	C20H28N4O4	-	-	-	14836
MEDP0390	Hypoxanthine-9-β-D-Arabinofuranoside	Nucleotide And Its metabolomics	Nucleotide and Its metabolomics	269.08	268.081	[M+H]+	C10H12N4O5	-	HMDB0003040	46874582	1496600
MEDP0170	Hypoxanthine	Nucleotide And Its metabolomics	Nucleotide and Its metabolomics	137	136.039	[M+H]+	C5H4N4O	C00262	HMDB0000157	790	206240
MEDP1988	Hydroxyurea	Others	Others	123.043	76.0273	[M+HCOO+2H]+	CH4N2O2	C07044	HMDB0015140	3657	1452000
MW0114605	Hydroxycitronellal	-	-	155.142	172.146	[M+H-H2O]+	C10H20O2	-	HMDB0031739	7888	498980
MEDP0682	Hydroxyacetone	Aldehyde,Ketones,Esters	Ketones	75.1	74.0368	[M+H]+	C3H6O2	C05235	HMDB0006961	8299	379300
MEDN0320	Hydrocinnamic Acid	Organic acid And Its derivatives	Organic acid And Its derivatives	149.06	150.068	[M-H]-	C9H10O2	C05629	HMDB0000764	107	121590
MW0124325	Huperzine B	-	-	257.162	256.158	[M+H]+	C16H20N2O	C09866	-	5462442	115680
MW0007323	Homochlorcyclizine	-	-	313.148	314.155	[M-H]-	C19H23ClN2	-	HMDB0240243	3627	34835
MW0151198	Homocapsaicin;Homocapsaicin I	-	-	318.206	319.215	[M-H]-	C19H29NO3	C20215	HMDB0036329	71448975	743030
ZINC31555018	Homoarecoline	-	-	168.1	169.224	[M-H]-	C9H15NO2	-	HMDB0038321	34167	19772
MEDP1987	His-Val	Amino acid and Its metabolomics	Small Peptide	237.132	254.138	[M+H-H2O]+	C11H18N4O3	-	HMDB0028898	7021870	8900.6
MEDP1869	His-Leu	Amino acid and Its metabolomics	Small Peptide	251.15	261.143	[M+H-H2O]+	C12H20N4O3	C05010	HMDB0028889	189008	75879
MW0107309	His-Ile	-	-	251.149	268.154	[M+H-H2O]+	C12H20N4O3	-	HMDB0028888	9900065	652380
MW0151112	His Trp Gly	-	-	399.18	398.17	[M+H]+	C19H22N6O4	-	-	-	526620
MW0150931	His Glu Tyr Lys	-	-	574.26	575.27	[M-H]-	C26H37N7O8	-	-	-	83789
MW0150914	His Glu Gln	-	-	413.177	412.171	[M+H]+	C16H24N6O7	-	-	-	1847500
MW0150885	His Cys Ile	-	-	372.169	371.163	[M+H]+	C15H25N5O4S1	-	-	-	12428
MW0150860	His Asn Phe Lys	-	-	545.279	544.276	[M+H]+	C25H36N8O6	-	-	-	2988200
MW0150831	His Ala Val Asp	-	-	441.21	440.202	[M+H]+	C18H28N6O7	-	-	-	28692
MEDN0317	Hippuric Acid	Organic acid And Its derivatives	Organic acid And Its derivatives	178.05	179.058	[M-H]-	C9H9NO3	C01586	HMDB0000714	464	1130900
MEDP1765	Hexylresorcinol	Benzene and substituted derivatives	Phenolics	195.139	194.131	[M+H]+	C12H18O2	-	HMDB0032567	3610	80765
MEDP0680	Hexylamine	Alcohol and amines	Amines	102.3	101.12	[M+H]+	C6H15N	C08306	HMDB0032323	8102	9
MEDN0658	Hexadecanedioic acid	FA	FFA	285.207	286.214	[M-H]-	C16H30O4	C19615	HMDB0000672	10459	117610
MEDL02106	Hesperetin	-	-	301.071	302.079	[M-H]-	C16H14O6	C01709	HMDB0005782	72281	81195
MW0150741	Heme O	-	-	873.339	838.376	[M+Cl]-	C49H58FeN4O5	C15672	HMDB0001162	15719509	57720
MW0124293	Hematoxyline	-	-	301.071	302.079	[M-H]-	C16H14O6	C09931	-	442514	1772300
MW0169251	harmine	-	-	247.074	212.095	[M+Cl]-	C13H12N2O	C06538	-	5280953	2626100
MW0169250	Harmane; PlaSMA ID-516	-	-	183.09	182.084	[M+H]+	C12H10N2	C09209	-	-	3519600
MW0150700	Haplodimerine	-	-	485.179	486.179	[M-H]-	C28H26N2O6	C10691	-	442909	332210
MW0150688	Halfordinol	-	-	239.07	238.074	[M+H]+	C14H10N2O2	C10596	-	442858	584230
MEDP0167	Guanosine	Nucleotide And Its metabolomics	Nucleotide and Its metabolomics	284.092	283.092	[M+H]+	C10H13N5O5	C00387	HMDB0000133	6802	43800
MEDP1276	Guanine	Nucleotide And Its metabolomics	Nucleotide and Its metabolomics	152.1	151.049	[M+H]+	C5H5N5O	C00242	HMDB0000132	764	147150
MW0138337	Grossamide	-	-	623.235	1324.94	[M-H]-	C36H36N2O8	-	HMDB0040370	5322012	9
MEDL02189	Gramine	-	-	238.129	174.116	[M+CH3CN+Na]+	C11H14N2	C08304	HMDB0035762	6890	483270
MEDL01949	Gossypol	-	-	483.18	518.194	[M+H-2H2O]+	C30H30O8	C07667	HMDB0040723	3503	36602
MW0107179	Gly-Lys	-	-	221.159	203.127	[M+NH4]+	C8H17N3O3	-	-	3080576	9
MEDP1863	Gly-His	Amino acid and Its metabolomics	Small Peptide	195.084	212.091	[M+H-H2O]+	C8H12N4O3	-	HMDB0028843	417360	67504
MEDP1670	Gly-Gly-Phe	Amino acid and Its metabolomics	Small Peptide	280.129	279.122	[M+H]+	C13H17N3O4	-	-	6993373	11911
MW0107124	Glycine, N-[2-(3,5-difluorophenyl)acetyl]-L-alanyl-2-phenyl-, 1,1-dimethylethyl ester, (2S)-	-	-	455.174	432.186	[M+Na]+	C23H26F2N2O4	-	-	5311272	64922
MEDP0006	Glycine	Amino acid and Its metabolomics	Amino acids	76	75.032	[M+H]+	C2H5NO2	C00037	HMDB0000123	750	115990
MW0150439	Gly Met Trp	-	-	393.165	392.152	[M+H]+	C18H24N4O4S1	-	-	-	8294.6
MW0150366	Gly Gly Gln	-	-	521.242	260.112	[2M+H]+	C9H16N4O5	-	-	-	895200
MW0150295	Gly Arg Arg Val His	-	-	624.369	623.362	[M+H]+	C25H45N13O6	-	-	-	25009
MW0150294	Gly Arg Ala	-	-	303.178	302.17	[M+H]+	C11H22N6O4	-	-	-	31888
MEDN0314	Glutaric Acid	Organic acid And Its derivatives	Organic acid And Its derivatives	131.034	132.042	[M-H]-	C5H8O4	C00489	HMDB0000661	743	41235
MEDL00369	Glu-Phe	-	-	277.117	294.122	[M+H-H2O]+	C14H18N2O5	-	HMDB0029156	18653118	112920
MEDP1653	Glu-Glu	Amino acid and Its metabolomics	Small Peptide	277.102	276.096	[M+H]+	C10H16N2O7	C05282	HMDB0011737	92865	50926
MW0114532	Glucobrassicin	-	-	447.056	448.061	[M-H]-	C16H20N2O9S2	-	HMDB0030243	6602378	610410
MW0150227	Glu-Arg	-	-	302.142	303.154	[M-H]-	C11H21N5O5	-	HMDB0028813	9796450	26873
MW0150175	Glu Trp Gln	-	-	462.202	461.191	[M+H]+	C21H27N5O7	-	-	-	52169
MW0150116	Glu Phe Tyr Lys	-	-	584.277	585.28	[M-H]-	C29H39N5O8	-	-	-	717240
MW0106915	Glu Met	-	-	320.127	278.094	[M+CH3CN+H]+	C10H18N2O5S1	-	-	-	92014
MW0150045	Glu Leu	-	-	243.133	260.137	[M+H-H2O]+	C11H20N2O5	-	-	-	155980
MW0149977	Glu Gln Lys Arg	-	-	558.3	559.308	[M-H]-	C22H41N9O8	-	-	-	24070
MEDP1859	Gln-Phe	Amino acid and Its metabolomics	Small Peptide	276.13	293.138	[M-H2O+H]+	C14H19N3O4	-	HMDB0028804	57288566	184900
MW0149768	Gln Met Met	-	-	409.159	408.15	[M+H]+	C15H28N4O5S2	-	-	-	171540
MW0149676	Gln Glu Asp	-	-	391.151	390.139	[M+H]+	C14H22N4O9	-	-	-	9
MW0149665	Gln Gln Gln Glu Gln	-	-	660.292	659.288	[M+H]+	C25H41N9O12	-	-	-	229580
MW0115689	Ginsenoyne B	-	-	293.139	1348.94	[M-H]-	C17H23ClO2	-	HMDB0039134	5317633	131100
MW0053527	Gibberellin A14	-	-	331.187	348.194	[M+H-H2O]+	C20H28O5	C11858	-	443451	55268
MW0053520	Gibberellin A12	-	-	331.194	332.199	[M-H]-	C20H28O4	C11857	-	443450	167480
MW0149548	Germacra-1(10),4,11(13)-trien-12-ol	-	-	255.16	220.183	[M+Cl]-	C15H24O	C19676	-	25245123	57988
MW0149547	Germacra-1(10),4,11(13)-trien-12-al	-	-	219.174	218.167	[M+H]+	C15H22O	C19677	-	25245391	2207900
MEDN1539	Genipin	Heterocyclic compounds	Heterocyclic compounds	225.077	226.084	[M-H]-	C11H14O5	C09780	HMDB0035830	442424	76542
MEDN1654	Gemfibrozil	Benzene and substituted derivatives	Benzene and substituted derivatives	249.15	250.157	[M-H]-	C15H22O3	C07020	HMDB0015371	3463	1381300
MW0124229	Gatifloxacin	-	-	358.155	375.159	[M+H-H2O]+	C19H22FN3O4	C07661	HMDB0015178	5379	33464
MW0053421	Ganoderic acid J	-	-	513.281	1451.08	[M-H]-	C30H42O7	-	HMDB0039641	20055991	51505
MW0149468	Ganoderic acid H	-	-	553.275	572.298	[M-H2O-H]-	C32H44O9	-	HMDB0035987	-	35446
MW0053410	Ganoderic acid B	-	-	515.298	1282.89	[M-H]-	C30H44O7	-	HMDB0035719	14109389	75220
MW0149446	gamma-L-Glutamyl-S-(hercyn-2-yl)-L-cysteine S-oxide	-	-	497.133	462.166	[M+Cl]-	C17H28N5O8S	C20995	-	86289929	393970
MW0149443	gamma-L-Glutamyl-D-alanine;L-gamma-Glutamyl-D-alanine	-	-	437.187	218.09	[2M+H]+	C8H14N2O5	C03738	-	151284	563660
MW0149442	gamma-L-Glutamyl-butirosin B	-	-	705.297	684.318	[M-2H+Na]-	C26H48N6O15	C18005	-	46174033	58789
MW0000265	Galantamine	-	-	268.13	287.152	[M-H-H2O]-	C17H21NO3	C08526	HMDB0014812	9651	1597200
MW0149387	Gal1-3GlcNAcSp	-	-	451.17	452.175	[M-H]-	C16H28N4O11	-	-	-	101760
MW0106741	Gabapentin	-	-	172.133	171.126	[M+H]+	C9H17NO2	-	HMDB0005015	6919078	307800
MW0124177	Furafylline	-	-	261.094	260.091	[M+H]+	C12H12N4O3	-	-	3433	264700
MW0114481	Fucose 1-phosphate	-	-	260.061	158.094	[M-H+NH3]-	C6H13O8P	-	HMDB0001265	439871	87200
MW0138192	Fraxetin	-	-	209.038	208.037	[M+H]+	C10H8O5	C09265	-	5273569	370040
MW0007207	Fluvoxamine Acid	-	-	319.123	318.119	[M+H]+	C14H17F3N2O3	-	HMDB0060950	46781630	67060
MW0007182	Fluometuron	-	-	231.075	232.082	[M-H]-	C10H11F3N2O	C18853	-	16562	53214
MW0007181	Flunixin	-	-	295.069	296.077	[M-H]-	C14H11F3N2O2	D04215	-	38081	12864
MW0149223	Flocoumafen	-	-	543.178	542.17	[M+H]+	C33H25F3O4	C18696	-	54698175	79463
MW0000261	Flazine	-	-	355.091	1381	[M+HCOO+2H]+	C17H12N2O4	-	HMDB0033459	5377686	202750
MEDN0811	FFA(9:0)	FA	FFA	157.123	158.131	[M-H]-	C9H18O2	C01601	HMDB0000847	8158	56533
MEDP0634	FFA(20:1)	FA	FFA	311.287	310.287	[M+H]+	C20H38O2	C16526	HMDB0002231	5282768	25863
MEDN0383	FFA(18:2)	FA	FFA	279.232	280.24	[M-H]-	C18H32O2	C01595	HMDB0000673	5280450	173680
MEDN0380	FFA(16:1)	FA	FFA	253.217	254.2	[M-H]-	C16H30O2	C08362	HMDB0003229	445638	2110500
MEDN0381	FFA(16:0)	FA	FFA	255.232	256.24	[M-H]-	C16H32O2	C00249	HMDB0000220	985	18460000
MEDN1159	FFA(15:1)	FA	FFA	239.201	240.209	[M-H]-	C15H28O2	-	-	5312411	363880
MEDN0385	FFA(12:0)	FA	FFA	199.17	200.17	[M-H]-	C12H24O2	C02679	HMDB0000638	3893	338060
MW0149165	Fexaramine	-	-	495.27	496.273	[M-H]-	C32H36N2O3	C15649	-	5326713	27212
MW0124112	Fentanyl	-	-	403.175	336.22	[M-2H+3Na]+	C22H28N2O	D00320	HMDB0014951	3345	9
MW0124111	Fenspiride	-	-	521.312	260.152	[2M+H]+	C15H20N2O2	D07949	-	3344	97660
MW0052898	Fenoldopam	-	-	328.074	305.082	[M+Na]+	C16H16ClNO3	C07693	HMDB0014938	3341	426240
MW0007116	Fenfuram	-	-	202.082	201.079	[M+H]+	C12H11NO2	C18833	-	90590	4428200
MW0124103	Fenbendazole	-	-	300.074	299.073	[M+H]+	C15H13N3O2S	D04140	HMDB0029745	3334	120430
MW0149131	Fasoracetam;NS 105	-	-	195.113	196.121	[M-H]-	C10H16N2O2	C13311	-	198695	160210
MEDP1918	Farnesylacetone	Aldehyde,Ketones,Esters	Ketones	263	262.4	[M+H]+	C18H30O	-	-	1711945	117020
MW0149125	Farnesoic acid;trans,trans-Farnesoic acid;(2E,6E)-Farnesoate	-	-	305.17	236.178	[M+Na+HCOOH]+	C15H24O2	C16502	-	5275507	17826
MW0124093	Famciclovir	-	-	322.152	321.144	[M+H]+	C14H19N5O4	D00317	HMDB0014570	3324	25522
MW0052787	Evodin	-	-	453.186	470.194	[M+H-H2O]+	C26H30O8	C03514	HMDB0035921	179651	110570
MW0010586	Eudesmin	-	-	404.213	386.173	[M+NH4]+	C22H26O6	C10561	-	73117	9
MW0124069	Etomidate	-	-	243.113	244.121	[M-H]-	C14H16N2O2	-	HMDB0014437	36339	35708
MEDN0678	Ethylsalicylate	Organic acid And Its derivatives	Organic acid And Its derivatives	165.055	166.063	[M-H]-	C9H10O3	-	HMDB0029817	8365	2742000
MEDP0658	Ethyl dodecanoate	Alcohol and amines	Amines	229.1	228.209	[M+H]+	C14H28O2	-	HMDB0033788	7800	1351400
MW0149033	Ethyl 3-(N-butylacetamido)propionate;Ethyl butylacetylaminopropionate	-	-	214.144	215.152	[M-H]-	C11H21NO3	C18830	-	104150	560030
MEDP1756	Ethisterone	CoEnzyme and vitamins	CoEnzyme and vitamins	313.218	312.209	[M+H]+	C21H28O2	C14487	-	5284557	17901
MEDN1484	Ethionamide	Heterocyclic compounds	Pteridines and derivatives	165.041	166.056	[M-H]-	C8H10N2S	-	-	-	1703200
MW0114419	Ethcathinone	-	-	178.116	177.115	[M+H]+	C11H15NO	-	-	458519	10212000
MW0149022	Estrololactone;3-Hydroxy-D-homo-17a-oxaestra-1,3,5(10)-trien-17-one	-	-	287.159	286.157	[M+H]+	C18H22O3	C14496	-	223999	122760
MW0006997	Estragole	-	-	183.056	148.089	[M+Cl]-	C10H12O	C10452	HMDB0034121	8815	9
MW0052640	Erythrodiol	-	-	489.391	442.381	[M+H+HCOOH]+	C30H50O2	C20945	HMDB0002360	101761	160980
MW0106599	epi-Tumonoic Acid D	-	-	282.207	283.215	[M-H]-	C16H29NO3	-	-	102000000	80377
MW0006983	Epitheaflagallin 3-O-gallate	-	-	551.087	1282.89	[M-H]-	C27H20O13	-	HMDB0033288	467319	317670
MW0052572	Epipregnanolone	-	-	353.232	318.256	[M+Cl]-	C21H34O2	C11825	HMDB0001471	228491	58298
MW0148919	ent-7alpha-Hydroxykaur-16-en-19-oic acid;(-)-Kaur-16-en-7beta-ol-19-oic acid;ent-7alpha-Hydroxykaur-16-en-19-oate	-	-	353.197	318.219	[M+Cl]-	C20H30O3	C11875	-	443467	78357
MW0123820	Enoxacin	-	-	321.122	320.128	[M+H]+	C15H17FN4O3	C06979	HMDB0014610	3229	95033
MW0123814	Emedastine	-	-	301.201	302.211	[M-H]-	C17H26N4O	C07785	HMDB0015216	3219	163340
MW0114388	Embelin	-	-	293.178	294.183	[M-H]-	C17H26O4	C10342	-	3218	5514100
MEDP1857	Eicosanoyl-EA	Organic acid And Its derivatives	Organic acid And Its derivatives	356.352	355.345	[M+H]+	C22H45NO2	-	-	3787294	3696200
MW0138026	Ecklonialactone A	-	-	291.193	290.188	[M+H]+	C18H26O3	-	-	23428255	191360
MW0006953	Ebastine	-	-	470.302	469.298	[M+H]+	C32H39NO2	D01478	HMDB0060159	3191	55621
MEDN0120	Dulcitol	Carboxylic acids and derivatives	Sugar alcohols	181.071	182.079	[M-H]-	C6H14O6	C01697	HMDB0000107	11850	9
MW0006942	Dulcin	-	-	181.096	180.09	[M+H]+	C9H12N2O2	C19415	HMDB0032565	9013	8144600
MW0138022	Duartin	-	-	374.164	332.126	[M+CH3CN+H]+	C18H20O6	-	-	3666064	230170
MW0148790	D-threo-3-Methylmalate	-	-	297.082	148.037	[2M+H]+	C5H8O5	C06031	-	440891	1638500
FDATN01519	D-Phenylalanine	-	-	166.086	165.079	[M+H]+	C9H11NO2	C02265	-	71567	2509600
MEDP2003	D-Ornithine	Amino acid and Its metabolomics	Amino acids	133.097	132.09	[M+H]+	C5H12N2O2	-	-	71082	39399
MEDP1234	Dopaquinone	Benzene and substituted derivatives	Benzene and substituted derivatives	196.06	195.053	[M+H]+	C9H9NO4	C00822	HMDB0001229	439316	210710
MEDP1007	Dopamine	Alcohol and amines	Polyamines	154.086	153.079	[M+H]+	C8H11NO2	C03758	HMDB0000073	681	20836
MW0106547	Domoic acid	-	-	312.14	311.137	[M+H]+	C15H21NO6	C13732	HMDB0033939	5282253	28251
MW0123750	Dodemorph	-	-	299.305	281.272	[M+NH4]+	C18H35NO	C18786	-	61899	145490
MEDN1488	Dodecylbenzenesulfonic acid	Organic acid And Its derivatives	Sulfonic acids	325.184	326.192	[M-H]-	C18H30O3S	-	-	8485	5454300
MEDP0308	Dodecanedioic Aicd	FA	FFA	231.152	230.152	[M+H]+	C12H22O4	C02678	HMDB0000623	12736	37961
MW0123749	Dodecahydro-8''-hydroxy-1'',2'(5'h)-furan-5',5''-[5h-1,4a](methanoxymethano)naphthalen]-2,9''-dione	-	-	385.147	364.189	[M+Na-2H]-	C20H28O6	-	-	317610	230550
MW0052460	Docosatrienoic acid	-	-	352.321	334.287	[M+NH4]+	C22H38O2	-	HMDB0002823	5312557	74121
MW0111016	Docosahexaenoyl ethanolamide	-	-	372.289	371.282	[M+H]+	C24H37NO2	-	HMDB0013658	5283451	308870
MW0114307	D-Mannosamine	-	-	180.085	179.079	[M+H]+	C6H13NO5	C03570	-	440049	26454
MEDP0218	D-Mannitol	Carboxylic acids and derivatives	Sugar alcohols	183.08	182.079	[M+H]+	C6H14O6	C00392	HMDB0000765	6251	9
MEDP0518	DL-Stachydrine	Organic acid And Its derivatives	Organic acid And Its derivatives	144.102	179.071	[M-Cl]+	C7H14ClNO2	-	-	44150282	171870
MEDP1061	DL-O-tyrosine	Amino acid and Its metabolomics	Amino acids	166.085	165.079	[M+H]+	C9H11NO2	C02057	HMDB0006050	994	9343200
MW0106487	Djenkolic acid	-	-	219.018	254.04	[M+H-2H2O]+	C7H14N2O4S2	C08275	-	68134	8781200
MW0148611	di-trans,poly-cis-Hexaprenyl diphosphate;ditrans,tricis-Hexaprenyl diphosphate	-	-	602.329	586.319	[M-H+NH3]-	C30H52O7P2	C17434	-	25245250	80367
MW0006902	Diphenylmethylphosphine oxide	-	-	263.081	216.07	[M+HCOO+2H]+	C13H13OP	-	-	75041	1607100
MEDN1090	Dioxindole	Heterocyclic compounds	Indole and Its derivatives	148.04	149.048	[M-H]-	C8H7NO2	-	-	114683	646850
MW0006884	Dioxacarb	-	-	241.116	223.084	[M+NH4]+	C11H13NO4	C18953	-	23421	641920
MW0052415	Dinorprostaglandin E1	-	-	307.191	326.209	[M-H2O-H]-	C18H30O5	-	-	16061101	295100
MEDN1533	Dimethylmalonic acid	Organic acid And Its derivatives	Organic acid And Its derivatives	131.034	132.042	[M-H]-	C5H8O4	-	HMDB0002001	11686	41235
MW0127456	Dimethyl sulfoxide	-	-	157.034	78.0139	[2M+H]+	C2H6OS	C11143	HMDB0002151	679	20315000
MW0052411	Dimethyl succinate	-	-	193.071	146.058	[M+HCOO+2H]+	C6H10O4	-	HMDB0033837	7820	67618
MW0052410	Dimethyl suberate	-	-	244.154	202.12	[M+CH3CN+H]+	C10H18O4	C17803	-	15611	98240
MW0111001	Dimethirimol	-	-	256.165	209.153	[M+HCOO+2H]+	C11H19N3O	C18784	-	135000000	383000
MW0006848	Dimepiperate	-	-	281.171	263.134	[M+NH4]+	C15H21NOS	C14571	-	91679	8350900
MW0114283	Dikegulac acid	-	-	275.114	274.105	[M+H]+	C12H18O7	C18825	-	65420	134660
MW0006844	Diisooctyl phthalate	-	-	413.267	390.277	[M+Na]+	C24H38O4	C14577	-	33934	3943800
MW0123681	Dihydrorhodamine 123	-	-	364.166	346.132	[M+NH4]+	C21H18N2O3	-	-	105032	197850
MW0006835	Dihydrocapsiate	-	-	309.204	1381	[M+H]+	C18H28O4	-	HMDB0034781	9873754	61248
MEDL02255	Dihydrocapsaicin	-	-	308.22	307.215	[M+H]+	C18H29NO3	C16952	HMDB0038457	107982	45780
MW0123656	Dihydro-4,6-dimethyl-4H-1,3,5-dithiazine	-	-	150.038	1447.05	[M+H]+	C5H11NS2	-	HMDB0039817	85824626	827370
MW0148485	Dihydro Isorescinnamine	-	-	654.331	636.305	[M+NH4]+	C35H44N2O9	-	-	232430	6913.7
MW0137955	Digallate;Digallic acid	-	-	321.028	322.033	[M-H]-	C14H10O9	C01572	HMDB0128305	341	112430
MW0052348	Difluprednate	-	-	489.211	508.227	[M-H2O-H]-	C27H34F2O7	C12695	HMDB0061149	443936	48104
MW0006824	Difenacoum	-	-	443.161	444.173	[M-H]-	C31H24O3	C16807	-	54676884	3190100
MEDN1230	Diethyl sulfate	Aldehyde,Ketones,Esters	Esters	153.022	154.03	[M-H]-	C4H10O4S	C14706	-	6163	63518
MW0052341	Diethyl sebacate	-	-	223.169	258.183	[M+H-2H2O]+	C14H26O4	D10682	HMDB0040429	8049	1525100
MEDP0777	Diethyl malonate	Aldehyde,Ketones,Esters	Esters	161.3	160.074	[M+H]+	C7H12O4	-	HMDB0029573	7761	151820
MEDP1470	Diethyl 2-methyl-3-oxosuccinate	Aldehyde,Ketones,Esters	Aldehydes	203	202.2	[M+H]+	C9H14O5	-	HMDB0032306	97750	54648
MW0006781	Dicamba	-	-	218.959	219.969	[M-H]-	C8H6Cl2O3	C18597	-	3030	304840
MW0052325	Dibutyl adipate	-	-	223.169	258.183	[M+H-2H2O]+	C14H26O4	C14253	-	7784	1632300
MW0123596	Dialifos	-	-	394.007	393.002	[M+H]+	C14H17ClNO4PS2	C19028	-	25146	113120
MW0006762	diacylglycerol kinase inhibitor i	-	-	460.196	459.178	[M+H]+	C27H26FN3OS	-	-	3012	72679
MEDN0220	D-Glucose	Carboxylic acids and derivatives	Sugars	179.057	180.063	[M-H]-	C6H12O6	C00031	HMDB0000122	5793	9442
MEDP0236	D-Gluconic Acid	Carboxylic acids and derivatives	Sugar acids	197.058	196.058	[M+H]+	C6H12O7	C00257	HMDB0000625	10690	304040
MW0148354	D-Galactose 6-phosphate;6-Phospho-D-galactose	-	-	278.063	260.03	[M+NH4]+	C6H13O9P	C01113	-	439404	160090
MEDP0895	Dethiobiotin	CoEnzyme and vitamins	CoEnzyme and vitamins	215.3	214.132	[M+H]+	C10H18N2O3	C01909	HMDB0003581	445027	94407
MW0148321	Desmethyldeschlorobenzoyl Indomethacin	-	-	190.051	191.058	[M-H]-	C10H9NO3	-	-	1111372	321960
MW0123566	Desipramine	-	-	267.185	266.178	[M+H]+	C18H22N2	C06943	HMDB0015282	2995	19731
MW0110983	D-erythro-Sphingosine C-20	-	-	328.321	327.314	[M+H]+	C20H41NO2	-	-	71684564	53863
MEDL02772	D-Erythrose-4-phosphate	-	-	236.972	200.009	[M+Cl]-	C4H9O7P	C00279	HMDB0001321	122357	174260
MEDN0226	D-Erythronolactone	Aldehyde,Ketones,Esters	Esters	117.019	118.027	[M-H]-	C4H6O4	-	HMDB0000349	5325915	69196
MW0169044	Deoxyvasicinone; PlaSMA ID-531	-	-	187.086	186.079	[M+H]+	C11H10N2O	C10659	-	-	296500
MW0103524	Deoxythymidine triphosphate	-	-	446.966	465.994	[M-H2O-H]-	C10H17N2O13P3	-	HMDB0001342	91746189	58032
MEDN0158	Deoxyguanosine	Nucleotide And Its metabolomics	Nucleotide and Its metabolomics	266.089	267.097	[M-H]-	C10H13N5O4	C00330	HMDB0000085	187790	52310
MW0049213	Demethylphylloquinone	-	-	473.285	436.334	[M-2H+K]-	C30H44O2	C13309	HMDB0004649	11954010	18277000
MW0148217	Delachlor	-	-	282.132	283.134	[M-H]-	C15H22ClNO2	C19050	-	32321	75228
MW0110977	Dehydrophytosphingosine	-	-	316.285	1451.08	[M+H]+	C18H37NO3	-	HMDB0038057	14757419	219210
MW0123501	Debromohymenialdisine	-	-	263.126	245.091	[M+NH4]+	C11H11N5O2	C19897	-	135000000	841660
MW0000215	Deacetylvindoline	-	-	437.194	414.216	[M+Na]+	C23H30N2O5	C01091	-	260534	9222500
MW0148148	DAN-1 EE	-	-	321.161	320.152	[M+H]+	C20H20N2O2	-	-	-	83539
MW0148132	D-Alanyl-D-serine	-	-	223.095	176.08	[M+H+HCOOH]+	C6H12N2O4	C19719	-	1549439	1352300
MEDP2022	D-4-Hydroxyphenylglycine	Amino acid and Its metabolomics	Amino acids	168.065	167.058	[M+H]+	C8H9NO3	-	-	89853	16495
FDATN00900	D(-)-Arabinose	-	-	166.081	150.13	[M-H+NH3]-	C5H10O5	C04233	-	6902	42043
MEDP0165	Cytosine	Nucleotide And Its metabolomics	Nucleotide and Its metabolomics	112	111.043	[M+H]+	C4H5N3O	C00380	HMDB0000630	597	16238
MEDP1749	Cytidine-5'-diphosphate	Nucleotide And Its metabolomics	Nucleotide and Its metabolomics	426.986	403.018	[M+Na]+	C9H15N3O11P2	-	-	6132	356920
MEDP0163	Cytidine	Nucleotide And Its metabolomics	Nucleotide and Its metabolomics	244.086	243.086	[M+H]+	C9H13N3O5	C00475	HMDB0000089	6175	19971
MEDN0822	Cysteine glutathione disulfide	Amino acid and Its metabolomics	Small Peptide	425.08	426.088	[M-H]-	C13H22N4O8S2	-	HMDB0000656	53477713	4149.2
MEDP0029	Cysteamine	Alcohol and amines	Polyamines	78.03	77.03	[M+H]+	C2H7NS	C01678	HMDB0002991	6058	72871
MW0148013	Cys His Ala	-	-	376.129	329.116	[M+HCOO+2H]+	C12H19N5O4S1	-	-	-	899560
MEDP1829	Cyperotundone	Aldehyde,Ketones,Esters	Ketones	219.017	218.33	[M+H]+	C15H22O	-	-	12308614	70735
MW0123476	Cylindrospermopsin	-	-	414.114	415.116	[M-H]-	C15H21N5O7S	C19999	-	42628600	225760
MEDP1932	Cyclo(Val-Ala)	Amino acid and Its metabolomics	Small Peptide	171.113	170.105	[M+H]+	C8H14N2O2	-	-	-	4666200
MEDP1931	Cyclo(Tyr-Leu)	Amino acid and Its metabolomics	Small Peptide	261.16	260.152	[M+H]+	C15H20N2O2	-	-	-	10327000
MEDP1930	Cyclo(Tyr-Ala)	Amino acid and Its metabolomics	Small Peptide	235.108	234.1	[M+H]+	C12H14N2O3	-	-	-	4123300
MEDP1929	Cyclo(Ser-Pro)	Amino acid and Its metabolomics	Small Peptide	185.093	184.086	[M+H]+	C8H12N2O3	-	-	-	3635500
MEDP1928	Cyclo(Pro-Val)	Amino acid and Its metabolomics	Small Peptide	197.129	196.122	[M+H]+	C10H16N2O2	-	-	-	5666700
MEDP1927	Cyclo(Pro-Pro)	Amino acid and Its metabolomics	Small Peptide	195.113	194.106	[M+H]+	C10H14N2O2	-	-	-	18190000
MEDP1926	Cyclo(Pro-Phe)	Amino acid and Its metabolomics	Small Peptide	245.12	245.128	[M+H]+	C14H16N2O2	C11847	-	-	28158000
MEDP1919	Cyclo(Pro-Leu)	Amino acid and Its metabolomics	Small Peptide	211	210.27	[M+H]+	C11H18N2O2	-	HMDB0034276	102892	5001000
MEDP1923	Cyclo(Phe-Glu)	Amino acid and Its metabolomics	Small Peptide	277.119	276.112	[M+H]+	C14H16N2O4	-	-	-	179800
MEDN1527	Cyclo(his-pro)	Amino acid and Its metabolomics	Small Peptide	233.104	234.112	[M-H]-	C11H14N4O2	C05302	-	449094	147130
MW0168984	Cyanazine; LC-ESI-ITFT; MS2; CE	-	-	287.103	240.089	[M+HCOO+2H]+	C9H13ClN6	C14299	-	-	634360
MW0137752	Coumestrol dimethyl ether	-	-	297.076	296.068	[M+H]+	C17H12O5	-	-	2785731	2538200
MEDL02179	Coumarin	-	-	188.071	146.037	[M+CH3CN+H]+	C9H6O2	C05851	HMDB0001218	323	46973
MW0106182	Cordeauxione	-	-	291.059	1366.99	[M-H]-	C14H12O7	-	HMDB0034310	136000000	387520
MEDL02026	Coniferaldehyde	-	-	242.08	178.063	[M+CH3CN+Na]+	C10H10O3	C02666	HMDB0141782	5280536	575170
MEDL00401	Confertifoline	-	-	233.155	234.162	[M-H]-	C15H22O2	C09376	-	435751	29037
MW0147718	Coenzyme F420-1	-	-	643.13	644.137	[M-H]-	C24H29N4O15P	C19152	-	45480638	38881
MW0000189	Codeinone	-	-	316.138	297.137	[M+F]-	C18H19NO3	C06171	-	5459910	76321
MW0010569	Clusin	-	-	401.159	1437.07	[M-H]-	C22H26O7	-	HMDB0029542	44575537	46308
MW0006635	Clozapine	-	-	327.133	326.13	[M+H]+	C18H19ClN4	C06924	HMDB0014507	135000000	1054400
MW0006634	Clovoxamine	-	-	285.132	284.129	[M+H]+	C14H21ClN2O2	-	-	9576737	9
MW0123389	Clofazimine	-	-	471.12	472.122	[M-H]-	C27H22Cl2N4	C06915	HMDB0014983	2794	63409
MW0114101	Clethodim	-	-	358.119	359.132	[M-H]-	C17H26ClNO3S	C18609	-	135000000	41483
MW0123367	Citbrasine	-	-	330.106	1338.96	[M-H]-	C17H17NO6	-	HMDB0037797	19093029	45599
MEDN1078	cis-EODA	FA	Oxidized lipids	297.243	298.251	[M-H]-	C18H34O3	C19418	HMDB0061650	119250	22572
MEDP0209	Cis-Aconitic Acid	Organic acid And Its derivatives	Organic acid And Its derivatives	175.016	174.016	[M+H]+	C6H6O6	C00417	HMDB0000072	643757	115620
MW0168938	cis-5-dodecenoic acid	-	-	197.155	198.162	[M-H]-	C12H22O2	-	-	5312378	312710
MW0147543	cis-3,4-Phenanthrenedihydrodiol-4-carboxylate	-	-	272.093	256.074	[M-H+NH3]-	C15H12O4	C18256	-	49787035	129530
MW0017134	cis-11-Methyl-2-dodecenoic acid	-	-	195.173	226.193	[M+H-H2O]+	C14H26O2	C18206	-	11469920	108460
MW0147521	cis-1,2-Dihydroxy-1,2-dihydro-7-methylnaphthalene	-	-	228.085	176.084	[M+Cl+NH3]-	C11H12O2	C14102	-	656877	138420
MW0147511	cis-(Homo)2-aconitate	-	-	223.028	202.048	[M-2H+Na]-	C8H10O6	C20581	-	25244890	3730300
MW0123340	Ciprofloxacin	-	-	332.137	331.133	[M+H]+	C17H18FN3O3	C05349	HMDB0014677	2764	839430
MEDP0332	Cinnamic Acid	Organic acid And Its derivatives	Organic acid And Its derivatives	149.052	148.052	[M+H]+	C9H8O2	C00423	HMDB0000930	444539	362680
MW0106150	Cilastatin	-	-	339.134	358.156	[M-H2O-H]-	C16H26N2O5S	C01675	HMDB0015535	6435415	165900
MW0017104	Cicaprost	-	-	397.186	374.209	[M+Na]+	C22H30O5	-	-	91746213	222370
MEDP1288	Chrysophanol	Benzene and substituted derivatives	Benzene and substituted derivatives	255.056	254.058	[M+H]+	C15H10O4	C10315	HMDB0030670	10208	90697
MEDP0125	Choline	Tryptamines,Cholines,Pigments	Cholines	105.11	104.108	[M+H]+	C5H14NO+	C00114	HMDB0000097	305	91752
MW0017083	Cholesterol 3-sulfate	-	-	506.324	466.312	[M-H+CH3CN]-	C27H46O4S	C18043	HMDB0000653	65076	26267
MW0006554	Chlorphenoxamine	-	-	350.149	303.139	[M+HCOO+2H]+	C18H22ClNO	D07198	HMDB0240223	6475	168210
MW0006551	Chloroxuron	-	-	289.077	290.082	[M-H]-	C15H15ClN2O2	-	-	16115	500740
MW0017059	Chlormadinone acetate	-	-	449.139	404.175	[M-H+2Na]+	C23H29ClO4	C12729	-	9324	654860
MW0006532	Chlorbromuron	-	-	292.967	291.961	[M+H]+	C9H10BrClN2O2	C11009	-	25912	1510500
MW0103492	Chavicol	-	-	179.045	134.073	[M-H+2Na]+	C9H10O	C16930	HMDB0034107	68148	240100
MW0147346	Cetraxate benzyl ester	-	-	414.208	395.21	[M+F]-	C24H29NO4	C03256	-	439959	17661
MW0000175	Cepharadione B	-	-	320.091	1507.14	[M-H]-	C19H15NO4	-	HMDB0030391	189151	155990
MW0123282	Cephalexin	-	-	370.082	347.094	[M+Na]+	C16H17N3O4S	C06895	HMDB0014707	27447	1070900
MW0147316	celecoxib carboxylic	-	-	410.039	411.05	[M-H]-	C17H12F3N3O4S	-	-	-	28856
MW0123279	Celecoxib	-	-	380.063	381.076	[M-H]-	C17H14F3N3O2S	C07589	HMDB0005014	2662	11895
MEDP0892	Catechol	Benzene and substituted derivatives	Phenolics	111.1	110.037	[M+H]+	C6H6O2	C00090	HMDB0000957	289	3012500
MEDL02248	Carnosol	-	-	329.175	330.183	[M-H]-	C20H26O4	C09069	HMDB0002121	442009	50989
MEDP1387	Carnitine C19:2	FA	CAR	438.358	438.358	[M+H]+	C26H47NO4	-	-	-	1791300
MEDP1414	Carnitine C12:1	FA	CAR	342.264	342.264	[M+H]+	C19H35NO4	-	-	-	5854.9
MW0110949	Carboxyphosphamide	-	-	358.028	292.015	[M+CH3CN+Na]+	C7H15Cl2N2O4P	C07646	HMDB0060449	31515	328830
MW0168906	CARBETAPENTANE	-	-	334.232	333.23	[M+H]+	C20H31NO3	D08334	-	2562	45379
MW0016395	Carbenoxolone	-	-	615.326	570.356	[M-H+2Na]+	C34H50O7	D07615	-	636403	2113200
MEDP1746	Carbendazim	Heterocyclic compounds	Heterocyclic compounds	192.079	191.069	[M+H]+	C9H9N3O2	C10897	-	25429	63348
MEDL01844	Capsidiol	-	-	283.188	236.178	[M+H+HCOOH]+	C15H24O2	C09627	HMDB0002352	161937	60473
MW0123208	Capsazepine	-	-	377.113	376.101	[M+H]+	C19H21ClN2O2S	-	-	2733484	138990
MEDL02238	Capsaicin	-	-	306.204	305.199	[M+H]+	C18H27NO3	C06866	HMDB0002227	1548943	9
MW0000166	Camptothecin	-	-	395.123	348.111	[M+HCOO+2H]+	C20H16N2O4	C01897	-	24360	188990
MEDP1900	Caffeine	Heterocyclic compounds	Heterocyclic compounds	195.088	194.08	[M+H]+	C8H10N4O2	C07481	HMDB0001847	2519	127770
MW0016280	C-8 Ceramide	-	-	408.377	425.387	[M+H-H2O]+	C26H51NO3	-	-	5702614	207820
MW0146954	C25-Epoxy-apo-aldehyde;(3S,5R,6S)-5,6-Epoxy-3-hydroxy-5,6-dihydro-12'-apo-beta-caroten-12'-al	-	-	446.265	382.251	[M+CH3CN+Na]+	C25H34O3	C14045	-	5282320	37223
MW0146951	C20915;Tabtoxin biosynthesis intermediate 5	-	-	360.134	291.143	[M+Na+HCOOH]+	C11H21N3O6	C20915	-	92042781	2270900
MW0168876	C18H29NO3; PlaSMA ID-1615	-	-	308.221	307.215	[M+H]+	C18H29NO3	C06849	-	-	612310
MW0123182	Butopyronoxyl	-	-	225.111	226.12	[M-H]-	C12H18O4	C19142	-	10760	134550
MW0106076	Butocarboxim	-	-	213.068	190.078	[M+Na]+	C7H14N2O2S	C18645	-	5360962	958360
MW0160144	butanedioate	-	-	136.061	116.011	[M+NH4]+	C4H4O4-2	-	-	160419	6116100
MW0016247	Bupropion	-	-	479.224	239.108	[2M+H]+	C13H18ClNO	C06860	HMDB0001510	444	545590
MW0123173	Buprofezin	-	-	369.17	305.156	[M+CH3CN+Na]+	C16H23N3OS	C10912	-	50367	9
MW0123155	Brazilin	-	-	304.12	286.084	[M+NH4]+	C16H14O5	C09920	-	73384	129010
MW0146813	Bocconarborine A;(+/-)-Bocconarborine A	-	-	737.249	736.242	[M+H]+	C44H36N2O9	C12196	-	443696	360860
MW0114007	Bispyribac	-	-	413.108	430.113	[M+H-H2O]+	C19H18N4O8	C10915	-	443031	44742
MW0006389	Bisphenol A diglycidyl ether	-	-	387.179	340.168	[M+HCOO+2H]+	C21H24O4	C14348	HMDB0032737	2286	9
MW0123130	Bisbynin	-	-	247.132	282.147	[M+H-2H2O]+	C15H22O5	-	HMDB0041324	85503029	1016800
MW0006368	Bis(2-ethylhexyl) phthalate	-	-	391.285	390.277	[M+H]+	C24H38O4	C03690	-	8343	1403100
MEDP1660	Bis(2-ethylhexyl) adipate	Organic acid And Its derivatives	Organic acid And Its derivatives	371.315	370.308	[M+H]+	C22H42O4	C14240	HMDB0040270	7641	67044
MEDP1196	Biotinamide	Alcohol and amines	Polyamines	244.108	243.104	[M+H]+	C10H17N3O2S	C01893	HMDB0001458	5006	24620
MEDN1427	Bicyclo Prostaglandin E2	FA	Oxidized lipids	333.207	334.214	[M-H]-	C20H30O4	-	HMDB0060054	5283043	51693
MEDP1818	Bicine	Organic acid And Its derivatives	Organic acid And Its derivatives	164.094	163.17	[M+H]+	C6H13NO4	-	HMDB0011727	8761	51991
MW0016124	Betaine aldehyde	-	-	102.09	101.084	[M+H]+	C5H11NO	C00576	HMDB0001252	249	33433
MEDP0039	Betaine	Others	Others	118.1	117.079	[M+H]+	C5H11NO2	C00719	HMDB0000043	247	44586
MW0106028	beta-Alanyl-L-lysine	-	-	269.139	217.143	[M+Cl+NH3]-	C9H19N3O3	C05341	HMDB0060442	440638	268260
MW0106027	beta-Alanyl-L-arginine	-	-	280.116	245.149	[M+Cl]-	C9H19N5O3	C05340	HMDB0060441	440637	129470
MW0106024	Bestatin	-	-	350.207	308.174	[M+CH3CN+H]+	C16H24N2O4	-	-	40427325	461140
MW0168819	berberine	-	-	355.13	336.123	[M+F]-	[C20H18NO4]+	C00757	-	2353	37335
MW0006328	Benzyloxycarbonylglycine	-	-	441.128	209.069	[2M+Na]+	C10H11NO4	C03710	-	14349	575660
MW0006315	Benzyl nicotinate	-	-	212.075	213.079	[M-H]-	C13H11NO2	C12865	-	7191	30308
MW0146609	benzyl 4-(1,3-dioxoisoindolin-2-yl)-2',2'-dimethyl-3',5-dioxo-2',3',4,5-tetrahydro-3H-spiro[furan-2,9'-imidazo[1,2-a]indole]-1'(9a'H)-carboxylate	-	-	552.175	551.169	[M+H]+	C31H25N3O7	-	-	-	52327
MW0137497	Benzoin	-	-	230.117	212.084	[M+NH4]+	C14H12O2	C01408	HMDB0032039	8400	741290
MW0006242	Benzocaine	-	-	166.086	165.079	[M+H]+	C9H11NO2	C07527	HMDB0004992	2337	40169
MW0146580	Benzo[a]pyrene-cis-7,8-dihydrodiol	-	-	321.074	286.099	[M+Cl]-	C20H14O2	C18275	-	9543349	59404
MW0146579	Benzo[a]pyrene-cis-4,5-dihydrodiol	-	-	321.064	286.099	[M+Cl]-	C20H14O2	C18270	-	40086	233010
MW0006230	Benzethonium chloride	-	-	412.304	411.314	[M+H]+	C27H41NO2	C12539	-	8478	9
MW0006210	Benzenepropanoic acid, 5-(3-carboxybenzoyl)-2-[[(5E)-6-(4-methoxyphenyl)-5-hexen-1-yl]oxy]-	-	-	485.198	502.199	[M+H-H2O]+	C30H30O7	-	-	6444688	54026
MW0006149	Benzamide, 4-(acetylamino)-N-(2-aminophenyl)-	-	-	316.128	269.116	[M+HCOO+2H]+	C15H15N3O2	D05988	-	2746	86161
MEDP1645	Benzamide	Alcohol and amines	Amines	122.06	121.053	[M+H]+	C7H7NO	C09815	HMDB0004461	2331	116770
MEDP1033	Benzaldehyde	Benzene and substituted derivatives	Benzene and substituted derivatives	107.048	106.042	[M+H]+	C7H6O	C00193	HMDB0006115	240	998480
MW0006138	Bentazone	-	-	261.032	240.057	[M+Na-2H]-	C10H12N2O3S	C10965	-	2328	76529
MW0146561	Benquinox	-	-	240.077	241.085	[M-H]-	C13H11N3O2	C18924	-	10320	180490
MW0168807	Baicalein-7-O-glucuronide	-	-	488.122	446.085	[M+CH3CN+H]+	C21H18O11	C10025	-	64982	9
MEDN0300	Azelaic Acid	Organic acid And Its derivatives	Organic acid And Its derivatives	187.097	188.105	[M-H]-	C9H16O4	C08261	HMDB0000784	2266	2901300
MW0146477	Avermectin B2b aglycone	-	-	604.345	588.33	[M-H+NH3]-	C33H48O9	C11955	-	11953970	78873
MW0146471	Avermectin B1b aglycone	-	-	284.147	570.319	[M-2H]-	C33H46O8	C11963	-	11953977	212250
MW0122981	Austdiol	-	-	300.084	236.069	[M+CH3CN+Na]+	C12H12O5	-	HMDB0030858	40604	1891400
MEDP1744	Astaxanthin	Others	Others	597.01	596.387	[M+H]+	C40H52O4	C08580	HMDB0002204	5281224	348320
MW0006083	Aspalatone	-	-	311.055	288.063	[M+Na]+	C15H12O6	-	-	197341	158570
MW0146229	Asp Phe Trp	-	-	467.18	466.185	[M+H]+	C24H26N4O6	-	-	-	29349
MW0145999	Asn-Tyr-OH	-	-	402.093	403.102	[M-H]-	C18H17N3O8	-	-	-	28369
MW0145888	Asn Ser Leu Arg	-	-	487.267	488.271	[M-H]-	C19H36N8O7	-	-	-	37667
MW0145885	Asn Ser Gly	-	-	553.227	276.107	[2M+H]+	C9H16N4O6	-	-	-	107550
MW0145850	Asn Phe Ala Arg	-	-	507.273	506.26	[M+H]+	C22H34N8O6	-	-	-	553440
MW0145768	Asn His Gly	-	-	327.142	326.134	[M+H]+	C12H18N6O5	-	-	-	1439300
MW0145731	Asn Gln Tyr Glu	-	-	553.224	552.218	[M+H]+	C23H32N6O10	-	-	-	45057
MW0145662	Asn Ala Leu Ala His	-	-	525.287	524.271	[M+H]+	C22H36N8O7	-	-	-	9
MW0145634	Artemisinate;Artemisinic acid	-	-	269.136	234.162	[M+Cl]-	C15H22O2	C20309	-	10922465	349930
MW0105759	Artemisia alcohol acetate	-	-	197.153	1507.14	[M+H]+	C12H20O2	-	HMDB0036048	524254	447130
MW0006078	Aromatic primary alcohol;Aromatic alcohol	-	-	131.048	108.058	[M+Na]+	C7H8O	C00556	HMDB0003119	244	2994800
MW0145572	Arg Val Ser	-	-	361.218	360.212	[M+H]+	C14H28N6O5	-	-	-	167420
MW0145554	Arg Tyr Val Lys	-	-	565.345	564.338	[M+H]+	C26H44N8O6	-	-	-	193290
MW0145549	Arg Tyr Ser	-	-	425.215	424.207	[M+H]+	C18H28N6O6	-	-	-	4719400
MW0145522	Arg Thr Lys Arg	-	-	560.369	559.355	[M+H]+	C22H45N11O6	-	-	-	4982800
MW0145517	Arg Thr Ile	-	-	389.249	388.243	[M+H]+	C16H32N6O5	-	-	-	30480
MW0145513	Arg Thr Cys	-	-	401.159	378.168	[M+Na]+	C13H26N6O5S1	-	-	-	9
MW0145509	Arg Thr Ala Arg	-	-	520.332	502.298	[M+NH4]+	C19H38N10O6	-	-	-	12373
MW0145494	Arg Ser Gln	-	-	390.211	389.202	[M+H]+	C14H27N7O6	-	-	-	262960
MW0145486	Arg Pro Ser	-	-	359.207	358.197	[M+H]+	C14H26N6O5	-	-	-	357210
MW0145353	Arg Glu Ser	-	-	391.188	390.186	[M+H]+	C14H26N6O7	-	-	-	32270
MW0145229	Arbusculin A	-	-	249.149	250.157	[M-H]-	C15H22O3	C09295	-	160153	517520
MEDP1131	Arachidyl glycine	Alcohol and amines	Amines	352.317	369.324	[M-H2O+H]+	C22H43NO3	-	-	83243	18502
MW0122904	Arachidonoylserotonin	-	-	461.317	462.325	[M-H]-	C30H42N2O2	-	-	10027372	2421000
MW0145222	Arachidonoyl 2'-Chloroethylamide	-	-	366.254	365.248	[M+H]+	C22H36ClNO	-	-	5311006	135920
MW0168764	apigenin-7-O-glucoside	-	-	431.109	432.106	[M-H]-	C21H20O10	C04608	-	5280704	50228
MW0145171	Antibiotic OA 6129B(sub 2)	-	-	489.212	473.183	[M-H+NH3]-	C20H31N3O8S	C17374	-	3067937	46875
MW0145169	Antibiotic OA 6129A	-	-	473.218	457.188	[M-H+NH3]-	C20H31N3O7S	C20813	-	128473	12385000
MW0006061	Anthraquinone	-	-	253.02	208.052	[M-H+2Na]+	C14H8O2	C16207	-	6780	31348000
MEDP1480	Anserine	Amino acid and Its metabolomics	Small Peptide	241	240.122	[M+H]+	C10H16N4O3	C01262	HMDB0000194	112072	54341
MW0145133	Ankorine	-	-	370.184	335.21	[M+Cl]-	C19H29NO4	C09337	-	442166	173010
MW0145036	Ammoresinol	-	-	381.204	382.214	[M-H]-	C24H30O4	C09056	-	54712597	431480
MW0105621	Aminoparathion	-	-	262.071	261.059	[M+H]+	C10H16NO3PS	C06605	HMDB0001504	220	9
MEDN0478	Aminomalonic Acid	Organic acid And Its derivatives	Organic acid And Its derivatives	118.014	119.022	[M-H]-	C3H5NO4	C00872	HMDB0001147	100714	148800
MW0006009	Alprenolol	-	-	250.172	249.173	[M+H]+	C15H23NO2	D07156	HMDB0015004	2119	3566200
MW0122805	Alprazolam	-	-	309.086	308.083	[M+H]+	C17H13ClN4	C06817	HMDB0014548	2118	1814300
MW0144995	alpha-Ribazole;N1-(alpha-D-Ribosyl)-5,6-dimethylbenzimidazole	-	-	320.169	278.127	[M+CH3CN+H]+	C14H18N2O4	C05775	HMDB0011112	160433	1940200
MEDP1035	alpha-hexylcinnamaldehyde	Benzene and substituted derivatives	Benzene and substituted derivatives	217.159	216.151	[M+H]+	C15H20O	-	HMDB0031736	1550884	70037
MW0105596	alpha-Fluoro-beta-alanine	-	-	108.043	107.038	[M+H]+	C3H6FNO2	C16632	HMDB0060434	13351	894220
MW0144954	alpha-D-Ribose 1-methylphosphonate 5-phosphate	-	-	290.998	308.006	[M+H-H2O]+	C6H14O10P2	C20423	-	70678985	1584000
MW0144937	alpha-Cyano-(-)-(R)-N-(alpha-phenethyl)-3,4-dihydroxycinnamide	-	-	307.108	308.116	[M-H]-	C18H16N2O3	-	-	5328772	62074
MW0122784	alpha-[3-(Nitrosoamino)propyl]-3-pyridinemethanol	-	-	391.204	195.101	[2M+H]+	C9H13N3O2	C19581	HMDB0062443	53297442	9
MW0122765	Alizapride	-	-	316.175	315.17	[M+H]+	C16H21N5O2	D07102	HMDB0015494	135000000	133950
MEDN1520	Aleuritic Acid	Organic acid And Its derivatives	Organic acid And Its derivatives	303.221	304.225	[M-H]-	C16H32O5	-	-	10790	8559.9
MEDP1118	Aldosterone	Aldehyde,Ketones,Esters	Ketones	361.191	360.194	[M+H]+	C21H28O5	C01780	HMDB0000037	5839	419220
MW0144853	Albaflavenone	-	-	253.142	218.167	[M+Cl]-	C15H22O	C17954	-	25137938	245010
MW0144848	Ala-Trp	-	-	274.119	275.127	[M-H]-	C14H17N3O3	-	-	85362	14280
MW0144836	Alangimarckine	-	-	515.298	475.284	[M-H+CH3CN]-	C29H37N3O3	C09328	-	442159	183740
MW0005977	Alachlor	-	-	316.13	269.118	[M+HCOO+2H]+	C14H20ClNO2	C10928	HMDB0031766	2078	171960
MW0144735	Ala Ser Ser Thr Lys	-	-	493.265	492.254	[M+H]+	C19H36N6O9	-	-	-	30747
MW0144704	Ala Pro Ala	-	-	258.144	257.138	[M+H]+	C11H19N3O4	-	-	-	260460
MW0144687	Ala Phe Gln Lys	-	-	491.264	492.27	[M-H]-	C23H36N6O6	-	-	-	9
MW0144604	Ala His Tyr Glu	-	-	517.207	518.212	[M-H]-	C23H30N6O8	-	-	-	131790
MW0144492	Ala Asn Gly	-	-	521.225	260.112	[2M+H]+	C9H16N4O5	-	-	-	143720
MW0144482	Ala Arg Trp	-	-	432.236	431.228	[M+H]+	C20H29N7O4	-	-	-	9
MW0144471	Ala Arg Glu	-	-	438.206	374.191	[M+CH3CN+Na]+	C14H26N6O6	-	-	-	831070
MW0144461	Ala Ala Pro Ala Ala	-	-	400.214	399.212	[M+H]+	C17H29N5O6	-	-	-	98385
MW0144451	Ala Ala Ala Arg Phe	-	-	535.296	534.291	[M+H]+	C24H38N8O6	-	-	-	1722400
MW0144447	Aklavinone	-	-	435.098	412.116	[M+Na]+	C22H20O8	C12424	-	159776	114060
MW0144423	Aflatoxin-M1-8,9-epoxide	-	-	379.017	344.053	[M+Cl]-	C17H12O8	C19594	-	53297448	8792.5
MW0144421	Aflatoxin B1-endo-8,9-epoxide	-	-	327.057	328.058	[M-H]-	C17H12O7	C19595	-	53297449	70738
MW0168699	aflatoxin B1	-	-	313.07	312.063	[M+H]+	C17H12O6	C06800	-	186907	166840
MEDN0299	Adipic Acid	Organic acid And Its derivatives	Organic acid And Its derivatives	145.05	146.058	[M-H]-	C6H10O4	C06104	HMDB0000448	196	147480
MEDP0160	Adenosine	Nucleotide And Its metabolomics	Nucleotide and Its metabolomics	268.097	267.097	[M+H]+	C10H13N5O4	C00212	HMDB0000050	60961	19092000
MEDP0159	Adenine	Nucleotide And Its metabolomics	Nucleotide and Its metabolomics	136.1	135.055	[M+H]+	C5H5N5	C00147	HMDB0000034	190	13050000
MW0144288	Aclacinomycin S;L-2-Deoxyfucosyl-L-rhodosaminyl-aklavinone	-	-	763.309	699.289	[M+CH3CN+Na]+	C36H45NO13	C18635	-	152639	15030
MW0105417	Acetyl tributyl citrate	-	-	423.197	1493.13	[M+Na-2H]-	C20H34O8	-	HMDB0034159	6505	294770
MW0005944	Acetochlor	-	-	292.107	269.118	[M+Na]+	C14H20ClNO2	C10925	-	1988	389090
MW0105414	Acetoacetic acid	-	-	121.029	102.032	[M+F]-	C4H6O3	C00164	HMDB0000060	96	15140000
MEDN1606	Acetanilide	Benzene and substituted derivatives	Benzene and substituted derivatives	134.061	135.068	[M-H]-	C8H9NO	C07565	HMDB0001250	904	223570
MW0122726	Acetamiprid	-	-	269.08	222.067	[M+HCOO+2H]+	C10H11ClN4	C18507	-	213021	117970
MW0144203	Abu-His-OH	-	-	347.1	348.107	[M-H]-	C15H16N4O6	-	-	-	34788
MW0144202	Abu-Asp-OH	-	-	325.068	326.075	[M-H]-	C13H14N2O8	-	-	-	526670
MW0103441	Abacavir	-	-	285.145	670.276	[M-H]-	C28H38N12O6S	D00891	HMDB0015182	441384	240440
MW0015500	9Z,11E,13E-Octadecatrienoic acid	-	-	296.258	278.225	[M+NH4]+	C18H30O2	C08315	-	5281115	96393
MW0015486	9-OxoOTrE	-	-	291.195	292.204	[M-H]-	C18H28O3	-	-	3017510	42645
MW0015479	9-Oxo-11-(3-pentyl-2-oxiranyl)-10E-undecenoic acid	-	-	309.206	310.214	[M-H]-	C18H30O4	-	HMDB0013623	5283007	39425
MEDP1170	9-octadecenal	Aldehyde,Ketones,Esters	Aldehydes	313.3	266.261	[M+H]+	C18H34O	-	HMDB0030965	5283381	567350
MW0005918	9-Hydroxybenzo[a]pyrene	-	-	269.092	268.089	[M+H]+	C20H12O	C14556	HMDB0062438	28598	945420
MW0015454	9-Hydroperoxy-10E,12Z-octadecadienoic acid	-	-	328.253	312.23	[M+NH4-2H]-	C18H32O4	-	HMDB0006940	6439847	32913
MW0122702	9H-Pyrido[3,4-B]indole	-	-	167.061	168.069	[M-H]-	C11H8N2	C20157	HMDB0012897	64961	1235500
MEDP0760	9-Fluorenone	Aldehyde,Ketones,Esters	Ketones	181.058	180.058	[M+H]+	C13H8O	C06712	-	10241	107740
MW0015445	9E,11E-Octadecadienoic acid	-	-	263.236	280.24	[M+H-H2O]+	C18H32O2	C04056	-	5280644	83570
MW0122684	9-Aminoacridine	-	-	241.095	194.084	[M+HCOO+2H]+	C13H10N2	-	-	7019	2348900
MW0160146	9-[(2R,3R,4S,5S)-3,4-dihydroxy-5-(methylsulfanylmethyl)oxolan-2-yl]-3H-purin-6-one	-	-	279.056	298.074	[M-H-H2O]-	C11H14N4O4S	-	-	161214	157910
MEDN0783	9,10-EpOME	-	-	295.226	296.235	[M-H]-	C18H32O3	-	-	-	285230
MW0144111	9,10-Dihydroxystearate	-	-	315.252	316.261	[M-H]-	C18H36O4	C08314	-	89377	44993
MEDN0376	9,10-DiHOME	FA	Oxidized lipids	313.238	314.246	[M-H]-	C18H34O4	C14828	HMDB0004704	9966640	284300
MW0144103	9,10,13-TriHOME;9,10,13-Trihydroxyoctadec-11-enoic acid;(11E)-9,10,13-Trihydroxyoctadec-11-enoic acid	-	-	659.472	330.241	[2M-H]-	C18H34O5	C14835	HMDB0004710	5282965	255460
MEDN1426	9(S),12(S),13(S)-TriHOME	FA	Oxidized lipids	329.233	330.241	[M-H]-	C18H34O5	C14833	HMDB04708	9858729	15545000
MW0015339	8-iso-13,14-dihydro-15-keto-PGF2a	-	-	353.229	217.11	[M-H]-	C20H34O5	-	HMDB0006562	5283214	151340
MW0144070	8-iso PGF3	-	-	351.215	352.225	[M-H]-	C20H32O5	-	-	-	515070
MW0144062	8-hydroxy-2'-deoxy Guanosine	-	-	282.096	283.092	[M-H]-	C10H13N5O5	-	-	-	272200
MW0144043	8-Demethylnovobiocic acid	-	-	421.142	381.121	[M-H+CH3CN]-	C21H19NO6	C20629	-	71581084	285270
MEDP1498	8-Azaguanine	Nucleotide And Its metabolomics	Nucleotide and Its metabolomics	153	152.11	[M+H]+	C4H4N6O	-	-	135403646	2835000
MEDN0494	8,15-Dihete	FA	FFA	335.222	336.23	[M-H]-	C20H32O4	-	HMDB0010219	53480358	266830
MW0144017	8,12-Diethylbacteriochlorophyllide d	-	-	293.123	588.259	[M-2H]-	C34H36MgN4O4	C21432	-	124000000	184280
MW0144016	8,12-Diethyl-3-vinylbacteriochlorophyllide d	-	-	612.271	570.248	[M+CH3CN+H]+	C34H34MgN4O3	C21427	-	124000000	2317500
MW0144011	8(9)-EET methyl ester	-	-	335.256	334.251	[M+H]+	C21H34O3	-	-	-	7761
MW0015225	7-Oxo-11-dodecenoic acid	-	-	213.149	212.141	[M+H]+	C12H20O3	-	-	4374065	45215
MEDN0149	7-Methylxanthine	Nucleotide And Its metabolomics	Nucleotide and Its metabolomics	165.041	166.049	[M-H]-	C6H6N4O2	C16353	HMDB0001991	68374	25551
MEDP0299	7-Methyluric Acid	Amino acid and Its metabolomics	Amino acid derivatives	183	182.044	[M+H]+	C6H6N4O3	C16355	HMDB0011107	69160	2140100
MW0015221	7-Methylrosmanol	-	-	359.182	360.194	[M-H]-	C21H28O5	-	HMDB0035813	455262	121460
MEDN1012	7-Methylguanine	Nucleotide And Its metabolomics	Nucleotide and Its metabolomics	164.057	165.065	[M-H]-	C6H7N5O	C02242	HMDB0000897	135398679	8582.5
MEDL02051	7-Hydroxy-4-methylcoumarin	-	-	223.062	176.047	[M+H+HCOOH]+	C10H8O3	C03081	HMDB0059622	5280567	1052100
MW0143958	7-Deoxyloganetin	-	-	281.102	212.105	[M+Na+HCOOH]+	C11H16O4	C20790	-	10262598	9
MW0143957	7-Deoxyloganetate	-	-	419.17	198.089	[2M+Na]+	C10H14O4	C20789	-	25203533	9
MW0122419	7-Chloro-3-methylquinoline-8-carboxylic acid	-	-	220.022	221.024	[M-H]-	C11H8ClNO2	C18891	-	91749	5024900
MW0122352	7-Aminoflunitrazepam	-	-	330.121	283.112	[M+HCOO+2H]+	C16H14FN3O	-	HMDB0041818	92294	18462
MW0143941	7alpha-Hydroxy-5beta-cholestan-3-one;5beta-Cholestan-7alpha-ol-3-one	-	-	517.229	402.35	[M-2H+3K]+	C27H46O2	C05451	HMDB0006892	5284270	630960
MW0143925	7,8-Dihydroxanthopterin	-	-	204.048	181.06	[M+Na]+	C6H7N5O2	C21065	-	135000000	810440
MW0015113	7(S),17(S)-Dihydroxy-8(E),10(Z),13(Z),15(E),19(Z)-docosapentaenoic acid	-	-	361.235	362.246	[M-H]-	C22H34O4	-	-	11588593	297450
MW0015111	7-(6-Oct-1-enyl-2,3-diazabicyclo[2.2.1]hept-2-en-5-yl)hept-5-enoic acid	-	-	369.198	332.246	[M+K-2H]-	C20H32N2O2	-	-	53394200	22335
MW0143899	6-Tuliposide B;6-O-[(3S)-3,4-Dihydroxy-2-methylenebutanoyl]-D-glucose	-	-	315.077	294.095	[M-2H+Na]-	C11H18O9	C21186	-	25034024	71287
MEDP1073	6-O-methylguanine	Nucleotide And Its metabolomics	Nucleotide and Its metabolomics	166.063	165.065	[M+H]+	C6H7N5O	-	-	65275	181830
MW0122260	6-Methyladenine	-	-	150.076	149.07	[M+H]+	C6H7N5	C08434	HMDB0002099	67955	388220
MW0136721	6'-Malonyltrifolirhizin	-	-	555.11	532.122	[M+Na]+	C25H24O13	C16231	HMDB0039246	23724669	234890
MW0015049	6-Ketomyristic acid	-	-	241.181	1366.99	[M-H]-	C14H26O3	-	HMDB0030982	454063	1159900
MW0015047	6-keto Testosterone Enanthate	-	-	413.265	414.277	[M-H]-	C26H38O4	-	-	52224351	116130
MW0113747	6-Hydroxypseudooxynicotine	-	-	215.082	194.106	[M-2H+Na]-	C10H14N2O2	C01297	HMDB0240264	439476	512570
MEDP0119	6-Hydroxynicotinic Acid	CoEnzyme and vitamins	CoEnzyme and vitamins	140	139.027	[M+H]+	C6H5NO3	C01020	HMDB0002658	72924	188890
MW0136698	6-Hydroxycoumarin	-	-	323.053	162.032	[2M-H]-	C9H6O3	-	HMDB0140948	99477	100840
MW0136697	6'-Hydroxyangolensin	-	-	287.09	1352.97	[M-H]-	C16H16O5	-	HMDB0041696	10779696	89932
MEDP0526	6-Dimethylaminopurine	Nucleotide And Its metabolomics	Nucleotide and Its metabolomics	164.086	163.086	[M+H]+	C7H9N5	-	HMDB0000473	3134	2612300
MEDP0298	6-Aminocaproic Acid	Amino acid and Its metabolomics	Amino acid derivatives	132.095	131.095	[M+H]+	C6H13NO2	C02378	HMDB0001901	564	231860
MW0159832	6,8-bis(sulfanyl)octanoic acid	-	-	255.076	208.059	[M+HCOO+2H]+	C8H16O2S2	-	-	421	5017600
MW0121842	6,7-Dimethyl-9-(2-acetoxyethyl)isoalloxazine	-	-	327.108	328.117	[M-H]-	C16H16N4O4	-	-	22641	187470
MW0121837	6,7-Dimethoxy-2-phenylquinoxaline	-	-	284.14	266.106	[M+NH4]+	C16H14N2O2	-	-	2049	1035700
MW0143737	6,7,12,13-Tetrahydro-5H-indolo[2,3-a]pyrrolo[3,4-c]carbazol-5-one	-	-	310.097	311.106	[M-H]-	C20H13N3O	C21126	-	3815	22364
MW0143729	6-(Allylthio)purine	-	-	191.045	192.047	[M-H]-	C8H8N4S	C15348	-	3633259	83138
MW0113268	5-Phosphoribosylamine	-	-	314.004	229.035	[M+K+HCOOH]+	C5H12NO7P	C03090	HMDB0001128	439905	183090
MW0143689	5-Oxoavermectin ''2b'' aglycone	-	-	602.328	586.314	[M-H+NH3]-	C33H46O9	C11954	-	11953969	55160
MEDN1164	5-nitrobenzimidazole	Heterocyclic compounds	Heterocyclic compounds	162.03	163.038	[M-H]-	C7H5N3O2	-	-	7195	17055
MW0005714	5-Nitro-2-(3-phenylpropylamino)benzoic acid	-	-	283.11	300.111	[M+H-H2O]+	C16H16N2O4	C13705	-	4549	9
MEDP0156	5-Methyluridine	Nucleotide And Its metabolomics	Nucleotide and Its metabolomics	259.085	258.085	[M+H]+	C10H14N2O6	-	HMDB0000884	445408	61654
MEDN1334	5-Methoxytryptophan	Amino acid and Its metabolomics	Amino acid derivatives	190	191.095	[M-H]-	C11H13NO2	-	HMDB0001896	12835	105470
MEDN0780	5-iPF2α-VI	FA	Oxidized lipids	353.233	354.241	[M-H]-	C20H34O5	-	-	-	470020
MEDP0273	5-Hydroxytryptophol	Heterocyclic compounds	Indole and Its derivatives	178.08	177.079	[M+H]+	C10H11NO2	-	HMDB0001855	9061	239740
MEDP0272	5-Hydroxyindole-3-Acetic Acid	Heterocyclic compounds	Indole and Its derivatives	192.06	191.058	[M+H]+	C10H9NO3	C05635	HMDB0000763	1826	9
MEDN0432	5-Hydroxyhexanoic Acid	Organic acid And Its derivatives	Organic acid And Its derivatives	131.071	132.079	[M-H]-	C6H12O3	-	HMDB0000525	170748	86411
MW0143633	5-Hydroxyconiferaldehyde	-	-	193.051	194.058	[M-H]-	C10H10O4	C12204	-	5282094	400060
MEDN1513	5-Hydroxy-2'-deoxyuridine	Nucleotide And Its metabolomics	Nucleotide and Its metabolomics	243.065	244.07	[M-H]-	C9H12N2O6	-	-	96622	33641
MW0121428	5-ethyl-2-nitro-9h-carbazole	-	-	241.096	240.09	[M+H]+	C14H12N2O2	-	-	222857	1603500
MEDP1018	5'-Deoxyadenosine	Nucleotide And Its metabolomics	Nucleotide and Its metabolomics	252	251.102	[M+H]+	C10H13N5O3	-	HMDB0001983	439182	8488800
MEDP1202	5'-deoxy-5'-fluoroadenosine	Nucleotide And Its metabolomics	Nucleotide and Its metabolomics	270.1	269.092	[M+H]+	C10H12FN5O3	C19766	-	448403	125620
MW0143601	5-Deoxy-5-chloroadenosine	-	-	301.086	285.063	[M-H+NH3]-	C10H12ClN5O3	C19768	-	5327118	286190
MW0121386	5-Chloro-6-methoxy-2(3H)-benzoxazolone	-	-	416.042	1366.99	[2M+NH4]+	C8H6ClNO3	-	HMDB0032846	15636	634650
MW0121138	5-benzyl-5-(pyridin-3-yl)imidazolidine-2,4-dione	-	-	268.107	267.101	[M+H]+	C15H13N3O2	-	-	-	41842
MEDP1949	5-Aminoimidazole ribonucleotide	Nucleotide And Its metabolomics	Nucleotide and Its metabolomics	296.067	295.056	[M+H]+	C8H14N3O7P	-	HMDB0001235	-	37194
MW0014695	5alpha-Dihydrodeoxycorticosterone	-	-	703.443	332.235	[2M+K]+	C21H32O3	C18040	HMDB0060407	6451493	23134
MW0121050	5-[2H-Pyrrol-4-(3H)-ylidenemethyl]-2-furanmethanol	-	-	176.07	1451.08	[M-H]-	C10H11NO2	-	HMDB0040045	132000000	62329
MW0143527	5,6-Indolequinone-2-carboxylic acid	-	-	275.991	191.022	[M+K+HCOOH]+	C9H5NO4	C17938	-	17796835	27169000
MEDN0262	5,6-Dihydroxyindole-2-Carboxylic Acid	Heterocyclic compounds	Indole and Its derivatives	192	193.038	[M-H]-	C9H7NO4	C04185	HMDB0001253	119405	58222
MEDP0154	5,6-Dihydro-5-Methyluracil	Nucleotide And Its metabolomics	Nucleotide and Its metabolomics	129.1	128.059	[M+H]+	C5H8N2O2	C00906	HMDB0000079	93556	610580
MW0143514	5,6,7,8-Tetrahydromonapterin	-	-	292.083	257.112	[M+Cl]-	C9H15N5O4	C21007	-	136000000	306510
MW0120946	5,6,7,8-Tetrahydro-2(1H)-quinolinone	-	-	132.079	149.084	[M+H-H2O]+	C9H11NO	-	-	264106	713280
MW0143510	5,4'-DIMETHOXY-7-HYDROXYFLAVONE	-	-	362.101	298.084	[M+CH3CN+Na]+	C17H14O5	-	-	-	1093700
MW0120912	5-(Tetradecyloxy)-2-furoic acid	-	-	323.219	324.23	[M-H]-	C19H32O4	-	-	115175	74642
MW0005440	5-(5-Chloro-2,4-Dihydroxyphenyl)-N-Ethyl-4-(4-Methoxyphenyl)isoxazole-3-Carboxamide	-	-	387.083	388.083	[M-H]-	C19H17ClN2O5	-	-	135000000	4085000
MEDP1242	4-tert-butylbenzoic acid	Benzene and substituted derivatives	Phenolic acids	179.106	178.099	[M+H]+	C11H14O2	C14535	-	17395535	179780
MEDP1600	4-Propylphenol	-	-	119.085	136.089	[M+H-H2O]+	C9H12O	C14311	HMDB0032625	12580	2292100
MW0143450	4-Phospho-L-aspartate;L-4-Aspartyl phosphate	-	-	251.974	213.004	[M+K]+	C4H8NO7P	C03082	HMDB0012250	152441	20741000
MEDN1399	4-Phenylbutyric acid	Organic acid And Its derivatives	Organic acid And Its derivatives	165.082	164.084	[M-H]-	C10H12O2	-	HMDB0031594	4775	5974900
MW0143448	4-Phenethylphenol;4-(2-Phenylethyl)phenol	-	-	197.096	198.105	[M-H]-	C14H14O	C14340	-	80630	62241
MW0113147	4-Oxo-2-nonenal	-	-	155.106	154.099	[M+H]+	C9H14O2	-	HMDB0060285	6445537	307470
MW0105267	4-Oxatetradecanoic acid	-	-	229.181	230.188	[M-H]-	C13H26O3	-	-	1754	28668
MW0113123	4-Methylpentanal	-	-	223.169	100.089	[2M+Na]+	C6H12O	C02373	HMDB0001318	129	387560
MEDN1702	4-Methyloctanoic acid	Organic acid And Its derivatives	Organic acid And Its derivatives	157.124	158.131	[M-H]-	C9H18O2	-	HMDB0031557	62089	12218
MW0143396	4-Methylburimamide	-	-	225.124	226.125	[M-H]-	C10H18N4S	C11801	-	3084972	354100
MEDN1331	4-Methoxyphenylacetic acid	Organic acid And Its derivatives	Organic acid And Its derivatives	165	166.063	[M-H]-	C9H10O3	-	HMDB0002072	7690	1510800
MW0120563	4-Hydroxytacrine	-	-	261.125	214.111	[M+HCOO+2H]+	C13H14N2O	-	-	179850	6092000
MW0005118	4-Hydroxyphenylacetaldehyde	-	-	137.059	136.052	[M+H]+	C8H8O2	C03765	HMDB0003767	440113	18548000
MW0127350	4-Hydroxyphenyl thiocyanate	-	-	150.001	151.009	[M-H]-	C7H5NOS	-	HMDB0040578	220327	411800
MW0105234	4-Hydroxy-L-isoleucine	-	-	211.107	147.089	[M+CH3CN+Na]+	C6H13NO3	-	-	2773624	4036200
MEDP2093	4'-hydroxyflavone	-	-	254.082	238.063	[M+NH4-2H]-	C15H10O3	-	-	229016	87164
MW0110845	4-Hydroxycyclophosphamide	-	-	340.036	276.02	[M+CH3CN+Na]+	C7H15Cl2N2O3P	C07643	HMDB0013856	99735	22295
MEDN0739	4-Hydroxybenzyl alcohol	Benzene and substituted derivatives	Benzene and substituted derivatives	123.045	124.052	[M-H]-	C7H8O2	C17467	HMDB0011724	125	109450
MEDN1167	4-Hydroxybenzoic Acid	Benzene and substituted derivatives	Phenolic acids	137.024	138.032	[M-H]-	C7H6O3	C00156	HMDB0000500	135	1377300
MEDN0410	4-Hydroxybenzaldehyde	Benzene and substituted derivatives	Benzene and substituted derivatives	121.029	122.037	[M-H]-	C7H6O2	C00633	HMDB0011718	126	3142300
MEDN1315	4-Hydroxy-3-methylbenzoic acid	Organic acid And Its derivatives	Organic acid And Its derivatives	151	152.047	[M-H]-	C8H8O3	-	HMDB0004815	68138	2996200
MEDN0128	4-Hydroxy-3-methoxybenzaldehyde	Benzene and substituted derivatives	Phenolics	151.04	152.047	[M-H]-	C8H8O3	C00755	HMDB0012308	1183	9
MW0143338	4-Hydroxy-2-oxohexanoic acid;4-Hydroxy-2-oxohexanoate	-	-	147.064	146.058	[M+H]+	C6H10O4	C06762	-	441164	9
MW0014460	4-Hexen-1-ol, (E)-	-	-	101.095	100.089	[M+H]+	C6H12O	-	-	641248	62264
MW0143316	4-Gingerol	-	-	265.143	266.152	[M-H]-	C15H22O4	-	-	5317596	101510
MW0004972	4-Fluoro-3-nitrobenzotrifluoride	-	-	208.007	209.01	[M-H]-	C7H3F4NO2	-	-	67778	476650
MW0143303	4-Dodecylphenol	-	-	280.263	262.23	[M+NH4]+	C18H30O	C14245	-	66030	28127000
MW0120419	4-Cyanoindole	-	-	189.065	142.053	[M+HCOO+2H]+	C9H6N2	-	-	3817602	53522
MW0143274	4-Chloro-17alpha-methyl-17beta-hydroxy-4-androsten-3-one;4-Chloro-17alpha-methyltestosterone	-	-	337.192	336.186	[M+H]+	C20H29ClO2	C15358	-	227107	9
MW0110832	4-Carboxynevirapine	-	-	295.084	1451.08	[M-H]-	C15H12N4O3	-	HMDB0060759	10709035	447820
MW0143259	4'-Apo-beta,psi-caroten-4'-al;beta-Apo-4'-carotenal	-	-	240.163	482.355	[M-2H]-	C35H46O	C19892	-	44224033	31239
MW0113020	4-Aminobutanal	-	-	108.045	87.0684	[M-2H+Na]-	C4H9NO	C00555	HMDB0001080	118	60807
MEDP2098	4-Amino-3-methylphenol	-	-	124.074	123.068	[M+H]+	C7H9NO	-	-	17819	217680
MW0004593	4-Amino-1,2-benzenediol	-	-	126.053	125.048	[M+H]+	C6H7NO2	C18351	-	151726	648550
MW0120167	4-Acetylimidazo[4,5-c]pyridine	-	-	160.051	1437.07	[M-H]-	C8H7N3O	-	HMDB0034888	577206	1858500
MEDN1092	4-acetoxyphenol	Benzene and substituted derivatives	Phenolics	151.026	152.047	[M-H]-	C8H8O3	C13636	-	96009	3784100
MW0120164	4-Acetoxy-2-hexyltetrahydrofuran	-	-	213.15	1310.92	[M-H]-	C12H22O3	-	HMDB0037398	61457	540720
MW0014392	4a-Carboxy-4b-methyl-5a-cholesta-8,24-dien-3b-ol	-	-	484.383	442.345	[M+CH3CN+H]+	C29H46O3	C15808	HMDB0001181	23724596	8426.6
MW0004578	4'-{[Pentanoyl(phenyl)amino]methyl}[1,1'-biphenyl]-2-carboxylic acid	-	-	386.179	387.183	[M-H]-	C25H25NO3	-	-	51529932	9
MW0161358	4-[(1S)-1-hydroxyethyl]phenol	-	-	185.081	138.068	[M+H+HCOOH]+	C8H10O2	-	-	10866400	389270
MW0143230	4-[(1-Oxo-7-phenylheptyl)amino]-(4R)-octanoic acid	-	-	346.237	347.246	[M-H]-	C21H33NO3	-	-	44563080	95866
MEDL01922	4,6-Dihydroxyquinoline	-	-	144.044	161.048	[M+H-H2O]+	C9H7NO2	C05639	HMDB0004077	440738	4059600
MW0133399	4,6,3',4',5'-Pentahydroxyauron	-	-	342.064	302.043	[M-H+CH3CN]-	C15H10O7	C08577	-	5281221	9
MW0143219	4,5-Dihydroxybenzo[a]pyrene;Benzo[a]pyrene-4,5-diol	-	-	300.106	284.084	[M-H+NH3]-	C20H12O2	C18279	-	107727	74006
MW0120025	4,5-Diaminofluorescein	-	-	363.096	362.09	[M+H]+	C20H14N2O5	-	-	10666340	313570
MW0014353	4,5beta-Dihydrocortisone	-	-	431.204	362.209	[M+Na+HCOOH]+	C21H30O5	C05469	HMDB0006758	65554	711040
MW0004438	4,4'-dimethyl[1,1'-biphenyl]-2,2',5,5'-tetrol	-	-	245.079	246.089	[M-H]-	C14H14O4	-	-	220284	1054900
MW0143186	4,4'-Diapolycopenedial	-	-	429.28	428.272	[M+H]+	C30H36O2	C19798	-	11102033	1723600
MW0119987	4-(Methylnitrosamino)-1-(3-pyridyl-N-oxide)-1-butanol;NNAL-N-oxide	-	-	260.072	225.111	[M+Cl]-	C10H15N3O3	C19603	HMDB0041953	150097	13683
MW0014328	4-(Methylnitrosamino)-1-(3-pyridyl)-1-butanol glucuronide	-	-	401.159	385.149	[M-H+NH3]-	C16H23N3O8	C19605	HMDB0060383	183009	9
MW0143144	4-(2-Hydroxyethoxycarbonyl)benzoate;4-[(2-Hydroxyethoxy)carbonyl]benzoate;Mono(2-hydroxyethyl) terephthalate;Mono(ethylene terephthalate)	-	-	209.046	210.053	[M-H]-	C10H10O5	C21450	-	174073	6180300
MW0112941	4-(2-Aminophenyl)-2,4-dioxobutanoic acid	-	-	206.045	207.053	[M-H]-	C10H9NO4	C01252	HMDB0000978	472	172680
MW0014297	3β-Hydroxy-5-cholenoic acid	-	-	355.26	374.282	[M-H2O-H]-	C24H38O3	-	HMDB0000308	92997	31345
MW0143132	3-Vinylbacteriochlorophyllide a;3-Deacetyl-3-vinylbacteriochlorophyllide a	-	-	634.308	616.254	[M+NH4]+	C35H36MgN4O5	C18152	-	46174055	18841
MEDP0873	3'-UMP	Nucleotide And Its metabolomics	Nucleotide and Its metabolomics	369	368	[M+H]+	C9H11N2Na2O9P	C01368	HMDB0060282	71295921	34130
MW0119773	3R-[[(4-Fluorophenyl)sulfonyl]amino]-1,2,3,4-tetrahydro-9H-carbazole-9-propanoic acid	-	-	439.114	416.121	[M+Na]+	C21H21FN2O4S	D01128	-	123879	156720
MW0119752	3-Pyridinecarboxaldehyde	-	-	125.07	107.037	[M+NH4]+	C6H5NO	C07327	-	10371	1850700
MEDL02714	3-Phospho-D-glyceric acid	-	-	220.969	185.993	[M+Cl]-	C3H7O7P	C00197	HMDB0060180	439183	887100
MW0004175	3-Phenylpropanal	-	-	152.107	134.073	[M+NH4]+	C9H10O	-	HMDB0033716	7707	34760
MEDN1704	3-phenylbutyric acid	Organic acid And Its derivatives	Organic acid And Its derivatives	163.076	164.084	[M-H]-	C10H12O2	-	HMDB0001955	20724	960750
MW0014265	3-Oxostearic acid	-	-	297.243	298.251	[M-H]-	C18H34O3	-	HMDB0010736	5283005	44566
MW0105120	3-Oxododecanoic acid	-	-	254.176	214.157	[M-H+CH3CN]-	C12H22O3	C02367	HMDB0010727	439717	928310
MW0133208	3'-O-Methyltricetin;Selagin;Tricetin 3'-methyl ether	-	-	315.05	316.058	[M-H]-	C16H12O7	C19739	HMDB0124865	11267045	722470
MW0133202	3-O-Methylcoumestrol	-	-	329.065	1451.08	[M+HCOO+2H]+	C16H10O5	-	HMDB0029584	132000000	1989500
MEDP2007	3-Methyloxindole	Heterocyclic compounds	Indole and Its derivatives	148.076	147.068	[M+H]+	C9H9NO	-	HMDB0004186	150923	9
MW0004134	3-Methylcatechol	-	-	107.048	124.052	[M+H-H2O]+	C7H8O2	C02923	-	340	11627000
MW0004131	3-Methylbenzenemethanol	-	-	186.089	122.073	[M+CH3CN+Na]+	C8H10O	C07216	HMDB0041473	11476	3309600
MEDP0899	3-Methyladenine	Nucleotide And Its metabolomics	Nucleotide and Its metabolomics	150	149.07	[M+H]+	C6H7N5	C00913	HMDB0011600	1673	144900
MW0112870	3-Methyl-2-butenal	-	-	107.048	84.0575	[M+Na]+	C5H8O	C07330	HMDB0012157	61020	462850
MW0143039	3-Methoxytyramine-betaxanthin	-	-	379.134	360.132	[M+F]-	C18H20N2O6	C17754	-	136000000	34257
MEDP0894	3-Methoxytyramine	Benzene and substituted derivatives	Phenolics	168.1	167.095	[M+H]+	C9H13NO2	C05587	HMDB0000022	1669	35806
MEDN1744	3-Methoxysalicylic Acid	-	-	167.038	168.042	[M-H]-	C8H8O4	-	HMDB59713	70140	128890
MW0143017	3-methoxy Prostaglandin F1	-	-	385.259	386.267	[M-H]-	C21H38O6	-	-	91885952	65550
MW0143014	3-Ketosucrose;3-Dehydro-alpha-D-glucosyl-beta-D-fructofuranoside	-	-	339.1	340.101	[M-H]-	C12H20O11	C05731	-	440773	254450
MW0112851	3-Ketolactose	-	-	359.104	340.101	[M+F]-	C12H20O11	C05403	HMDB0001030	440659	4561.8
MW0014142	3-Ketocholesterol	-	-	499.215	384.339	[M-2H+3K]+	C27H44O	-	-	9908107	509410
MW0119662	3-Isopropyl-2-methoxy-5-methylpyrazine	-	-	167.117	1493.13	[M+H]+	C9H14N2O	-	HMDB0029742	15590168	701420
MEDP0270	3-Indolebutyric Acid	Heterocyclic compounds	Indole and Its derivatives	204.1	203.095	[M+H]+	C12H13NO2	C11284	HMDB0002096	8617	12869000
MEDN1604	3-hydroxy-tetradecanoic acid	Organic acid And Its derivatives	Organic acid And Its derivatives	243.195	244.204	[M-H]-	C14H28O3	-	HMDB0010731	16064	1517500
MW0014120	3-Hydroxysintaxanthin	-	-	429.318	1324.94	[M+H-H2O]+	C31H42O2	-	HMDB0035641	132000000	18703
MEDP1898	3-Hydroxyphenylurea	Benzene and substituted derivatives	Benzene and substituted derivatives	153.065	152.059	[M+H]+	C7H8N2O2	C05842	-	12796	5085000
MEDN1009	3-hydroxyphenylacetic acid	Organic acid And Its derivatives	Organic acid And Its derivatives	151.04	152.047	[M-H]-	C8H8O3	C05593	HMDB0000440	12122	12432000
MEDP0446	3-Hydroxykynurenine	Amino acid and Its metabolomics	Amino acid derivatives	225.1	224.08	[M+H]+	C10H12N2O4	C02794	HMDB0000732	89	48397
MEDN0429	3-Hydroxyhippuric Acid	Amino acid and Its metabolomics	Amino acid derivatives	194.045	195.053	[M-H]-	C9H9NO4	-	HMDB0006116	450268	43494
MEDL00416	3-Hydroxydodecanoic acid	-	-	215.165	216.173	[M-H]-	C12H24O3	-	HMDB0000387	-	612610
MEDN1504	3-Hydroxycinnamic acid	Organic acid And Its derivatives	Organic acid And Its derivatives	163.044	164.047	[M-H]-	C9H8O3	-	HMDB0001713	637541	68530
MW0105037	3-Hydroxycapric acid	-	-	187.133	188.141	[M-H]-	C10H20O3	-	HMDB0002203	26612	552080
MEDN1697	3-Hydroxybenzyl alcohol	Alcohol and amines	Alcohols	123.045	124.052	[M-H]-	C7H8O2	-	HMDB0059712	102	31420
MW0142966	3-hydroxyandrost-5-en-17-one sulfate	-	-	387.164	368.166	[M+F]-	C19H28O5S	-	-	-	19486
MW0142955	3-Hydroxy-5,9,17-trioxo-4,5:9,10-disecoandrosta-1(10),2-dien-4-oate;(1E,2Z)-3-Hydroxy-5,9,17-trioxo-4,5:9,10-disecoandrosta-1(10),2-dien-4-oate;DSHA	-	-	393.13	348.157	[M-H+2Na]+	C19H24O6	C04844	-	25244777	9
MW0142953	3-Hydroxy-4-hydroxymethyl-2-methylpyridine-5-carboxylate;5-Pyridoxate;5-Pyridoxic acid	-	-	367.108	183.053	[2M+H]+	C8H9NO4	C04773	-	440474	145430
MEDP1726	3-Hydroxy-4-aminopyridine	Heterocyclic compounds	Heterocyclic compounds	111.055	110.048	[M+H]+	C5H6N2O	-	HMDB0060741	2762419	46077
MEDN0290	3-Hydroxy-3-Methyl Butyric Acid	Organic acid And Its derivatives	Organic acid And Its derivatives	117.055	118.063	[M-H]-	C5H10O3	-	HMDB0000754	69362	352290
MEDP1027	3-Hydroxy-2-methyl-4H-pyran-4-one	Heterocyclic compounds	Heterocyclic compounds	127.031	126.032	[M+H]+	C6H6O3	C11918	HMDB0030776	8369	16494
MW0014038	3-Hexaprenyl-4,5-dihydroxybenzoic acid	-	-	599.352	562.402	[M-2H+K]-	C37H54O4	C05200	HMDB0001063	5280760	65931
MW0119585	3-Furancarboxylic acid, tetrahydro-4-methylene-2-octyl-5-oxo-, (2R,3S)-	-	-	253.141	254.152	[M-H]-	C14H22O4	-	-	9881506	274240
MEDN1602	3-Deoxyguanosine	Nucleotide And Its metabolomics	Nucleotide and Its metabolomics	266.089	267.097	[M-H]-	C10H13N5O4	-	HMDB0000085	135440068	52566
MEDP1955	3'-Deoxyadenosine	Nucleotide And Its metabolomics	Nucleotide and Its metabolomics	252	251.102	[M+H]+	C10H13N5O3	C08431	-	-	8488800
MEDP0592	3-Dehydrosphinganine	SL	SM	300.282	299.282	[M+H]+	C18H37NO2	C02934	HMDB0001480	439853	143750
MEDN0833	3-Dehydroshikimate	Organic acid And Its derivatives	Organic acid And Its derivatives	171.029	172.037	[M-H]-	C7H8O5	C02637	HMDB0000390	439774	38756
MW0142890	3-Dehydro-L-gulonate 6-phosphate	-	-	326.007	274.009	[M+Cl+NH3]-	C6H11O10P	C14899	-	11954078	81176
MW0110794	3-Cyclohexyl-6-(dimethylamino)-1-methyl-s-triazine-2,4(1H,3H)-dione	-	-	253.169	252.159	[M+H]+	C12H20N4O2	C10926	-	39965	16405
MEDP0669	3-Chloroaniline	Benzene and substituted derivatives	Benzene and substituted derivatives	128.1	127.019	[M+H]+	C6H6ClN	-	-	7932	3419500
MW0142864	3-Carboxy-cis,cis-muconate;beta-Carboxy-cis,cis-muconate;cis,cis-Butadiene-1,2,4-tricarboxylate	-	-	250.036	186.016	[M+CH3CN+Na]+	C7H6O6	C01163	-	5280404	187790
MW0142831	3beta-Cyclopentyl-5alpha-androstan-17beta-ol	-	-	345.308	344.308	[M+H]+	C24H40O	C14979	-	246162	981500
MW0013961	3beta,5alpha,6beta-Trihydroxycholestane	-	-	535.237	420.36	[M-2H+3K]+	C27H48O3	C05425	HMDB0003990	91498	84001
MW0112758	3-Benzoylalanine	-	-	211.106	193.074	[M+NH4]+	C10H11NO3	C03450	-	412786	143190
MEDP1723	3-Amino-2-piperidinone	Heterocyclic compounds	Heterocyclic compounds	115.086	114.079	[M+H]+	C5H10N2O	C00182	HMDB0000323	5200225	34863
MEDP1218	3-Amino-2-menacarboxylic acid	Benzene and substituted derivatives	Phenolic acids	170.1	187.063	[M-H2O+H]+	C11H9NO2	-	-	22244	137710
MW0104961	3-Amino-2,3-dihydrobenzoic acid	-	-	122.057	139.063	[M+H-H2O]+	C7H9NO2	C12110	-	3445	198780
MW0003793	3-Amino-2-(4-chlorophenyl)-2-hydroxypropanesulfonic acid	-	-	284.021	265.018	[M+F]-	C9H12ClNO4S	-	-	1564	1418300
MW0119375	3alpha-Hydroxyoreadone	-	-	251.133	1507.14	[M-H]-	C14H20O4	-	HMDB0036047	132000000	574970
MW0168242	3alpha,21-Dihydroxy-5beta-pregnane-11,20-dione;5beta-Pregnane-3alpha,21-diol-11,20-dione	-	-	369.201	348.23	[M-2H+Na]-	C21H32O4	C05478	HMDB06755	440698	114460
MW0142781	3alpha,12alpha-Dihydroxy-5beta-chol-6-enoate	-	-	391.284	390.277	[M+H]+	C24H38O4	C11637	-	443323	445170
MW0013914	3a-Hydroxy-5b-pregnane-20-one	-	-	353.23	276.072	[M+Cl]-	C21H34O2	-	HMDB0006759	24779614	177530
MW0013889	3a,21-Dihydroxy-5b-pregnane-11,20-dione	-	-	395.24	130.018	[M+H+HCOOH]+	C21H32O4	-	HMDB0006755	44263347	528200
MEDN1701	3,5-Dihydroxybenzoic acid	Organic acid And Its derivatives	Organic acid And Its derivatives	153.019	154.027	[M-H]-	C7H6O4	-	HMDB0013677	7424	125140
MW0119221	3',5'-Cyclic dAMP	-	-	329.084	313.058	[M+NH4-2H]-	C10H12N5O5P	C00968	-	188955	66921
MW0119210	3,5,7,8-Tetrahydro-2-[4-(trifluoromethyl)phenyl]-4H-thiopyrano[4,3-d]pyrimidin-4-one	-	-	357.029	312.054	[M-H+2Na]+	C14H11F3N2OS	-	-	135000000	129500
MW0013829	3,4-Dimethyl-5-pentyl-2-furanpropanoic acid	-	-	237.147	238.157	[M-H]-	C14H22O3	-	HMDB0112083	23425504	163360
MW0142686	3,4-Dihydroxyfluorene	-	-	214.087	198.068	[M-H+NH3]-	C13H10O2	C07717	-	441316	171510
MW0003586	3,4,5-Trimethoxyphenol	-	-	185.073	184.074	[M+H]+	C9H12O4	C10765	-	69505	235820
MW0132539	3,4,5-Trimethoxydihydrocinnamic acid	-	-	261.074	240.1	[M+Na-2H]-	C12H16O5	-	HMDB0030254	64860	488560
MEDL02751	3,4,2',4',6'-Pentahydroxychalcone	-	-	323.031	288.063	[M+Cl]-	C15H12O6	C15525	HMDB0126020	5461154	29273
MW0003565	3,3'-Dimethoxybenzidine	-	-	489.248	244.121	[2M+H]+	C14H16N2O2	C19231	-	8411	1541800
MEDP0765	3-(Methylthio)-1-propanol	Alcohol and amines	Alcohols	107.045	106.045	[M+H]+	C4H10OS	-	HMDB0031716	10448	8065100
MW0104890	3-(Methylseleno)-L-alanine	-	-	234.975	182.98	[M+Cl+NH3]-	C4H9NO2Se	C05689	HMDB0004113	147004	181270
MEDN1017	3-(4-Hydroxyphenyl)-Propionic Acid	Benzene and substituted derivatives	Phenolic acids	165.06	166.063	[M-H]-	C9H10O3	C01744	HMDB0002199	10394	8651900
MEDN1503	3-(4-Hydroxyphenyl)-1-propanol	Organic acid And Its derivatives	Organic acid And Its derivatives	151.077	152.084	[M-H]-	C9H12O2	-	HMDB0032599	82452	204860
MW0131247	3-(3-hydroxyphenyl)-1-(2,3,4,6-tetrahydroxyphenyl)propane-1,2-dione	-	-	320.075	304.058	[M+NH4-2H]-	C15H12O7	-	HMDB0126565	132000000	377280
MEDN1681	3-(2-Naphthyl)-L-alanine	Amino acid and Its metabolomics	Amino acid derivatives	214.1	215.095	[M-H]-	C13H13NO2	-	-	-	56543
MEDN1706	3-(2-Hydroxyphenyl)propanoic acid	Benzene and substituted derivatives	Phenolic acids	165.06	166.063	[M-H]-	C9H10O3	-	HMDB0033752	873	8651900
MW0142602	3-(2-Carboxyvinyl)naphthalene-2-carboxylic acid	-	-	241.06	242.058	[M-H]-	C14H10O4	C16209	-	14945680	1097500
MW0168538	3-(2,5-dimethoxyphenyl)propanoic acid	-	-	231.063	210.089	[M+Na-2H]-	C11H14O4	-	-	-	153900
MEDL02022	3-(2-(Methylamino)ethyl)-1H-indol-5-ol	-	-	259.11	190.111	[M+Na+HCOOH]+	C11H14N2O	C06212	HMDB0004369	150885	1241200
MW0142577	2-Succinylbenzoate;o-Succinylbenzoate;Succinylbenzoate	-	-	257.027	222.053	[M+Cl]-	C11H10O5	C02730	-	955	1443000
MEDP0545	2-Pyrrolidinone	Heterocyclic compounds	Heterocyclic compounds	86.0528	85.0528	[M+H]+	C4H7NO	-	HMDB0002039	12025	525490
MADN0564	2-pyrimidine acetic acid	-	-	137.035	138.043	[M-H]-	C6H6N2O2	-	-	12367098	532990
MW0118876	2-Pyrimidin-2-yl-Propionic Acid	-	-	151.051	152.059	[M-H]-	C7H8N2O2	-	-	17937042	32193
MW0130918	2-Propenamide, 2-cyano-3-(3,4-dihydroxyphenyl)-N-(phenylmethyl)-, (2E)-	-	-	341.111	294.1	[M+HCOO+2H]+	C17H14N2O3	-	-	5328779	71924
MEDN0098	2-Picolinic Acid	Heterocyclic compounds	Pteridines and derivatives	122.024	123.032	[M-H]-	C6H5NO2	C10164	HMDB0002243	1018	430300
MW0003352	2-Phenylpropionaldehyde	-	-	117.069	134.073	[M+H-H2O]+	C9H10O	-	HMDB0031626	7146	2607800
MEDN1502	2-Phenylbutyric acid	Organic acid And Its derivatives	Organic acid And Its derivatives	163.077	164.084	[M-H]-	C10H12O2	-	HMDB0000329	7012	27936
MEDP0654	2-Phenylacetamide	Benzene and substituted derivatives	Benzene and substituted derivatives	136	135.068	[M+H]+	C8H9NO	C02505	HMDB0010715	7680	499560
MEDP0789	2-Pentyl-3-phenyl-2-propenal	Aldehyde,Ketones,Esters	Aldehydes	203.4	202.136	[M+H]+	C14H18O	C12288	HMDB0031313	1712058	118940
MW0142552	2-Oxosuberate;2-Oxooctanedionic acid;alpha-Ketosuberate	-	-	228.084	188.069	[M-H+CH3CN]-	C8H12O5	C16589	-	146903	62371
MW0142537	2-Oxo-4-phosphonobutanoate;2-Oxo-4-phosphonobutanoic acid	-	-	251	181.998	[M+Na+HCOOH]+	C4H7O6P	C17941	-	14668642	469380
MW0142511	2-O-(alpha-D-Glucopyranosyl)-D-glycerate;(R)-2-(alpha-D-Glucopyranosyloxy)-3-hydroxypropanoate	-	-	267.077	268.079	[M-H]-	C9H16O9	C19792	-	46199512	122970
MW0003301	2-Nitrophenol	-	-	138.019	139.027	[M-H]-	C6H5NO3	C01988	-	6947	79653
MEDN0285	2-Methylsuccinic Acid	Organic acid And Its derivatives	Organic acid And Its derivatives	131.034	132.042	[M-H]-	C5H8O4	C08645	HMDB0001844	10349	41235
MW0118781	2-Methylquinolin-4-ol	-	-	158.06	159.068	[M-H]-	C10H9NO	C21873	-	69089	87678
MW0104814	2-Methylpropyl formate	-	-	222.172	1324.94	[2M+NH4]+	C5H10O2	-	HMDB0031247	10957	360760
MW0142480	2-Methylisoborneol;1,2,7,7-Tetramethyl-exo-bicycloheptan-2-ol	-	-	167.144	168.151	[M-H]-	C11H20O	C20243	-	11062802	75776
MEDP0461	2-Methylguanosine	Nucleotide And Its metabolomics	Nucleotide and Its metabolomics	298.1	297.107	[M+H]+	C11H15N5O5	-	HMDB0005862	135501934	18865
MW0104809	2-Methyl-D-serine	-	-	239.126	119.058	[2M+H]+	C4H9NO3	C02115	-	439656	50997
MW0003254	2-Methylbenzenemethanol	-	-	105.069	122.073	[M+H-H2O]+	C8H10O	C07213	HMDB0041472	6994	570070
MEDN0721	2-Methyl-5-nitroimidazole-1-ethanol	Alcohol and amines	Alcohols	170.057	171.064	[M-H]-	C6H9N3O3	C07203	HMDB0015052	4173	277880
MEDP1982	2-Methyl-1-Pyrroline	Heterocyclic compounds	Heterocyclic compounds	84.08	83.0735	[M+H]+	C5H9N	C20808	-	70103	195670
MW0013552	2-Methoxy-estradiol-17beta 3-glucuronide	-	-	513.188	478.22	[M+Cl]-	C25H34O9	C11131	HMDB0006765	443076	37204
MW0118680	2-Methoxy-6-methylpyrazine	-	-	123.056	1338.96	[M-H]-	C6H8N2O	-	HMDB0040143	520395	101260
MW0003199	2-Methoxy-5-nitrophenol	-	-	168.03	169.037	[M-H]-	C7H7NO4	C17385	-	69471	448900
MW0118671	2-Methoxy-3,5-dimethylpyrazine	-	-	139.085	138.079	[M+H]+	C7H10N2O	-	HMDB0040911	6429218	386660
MW0118670	2-Methoxy-3-(2-methylpropyl)pyrazine	-	-	167.118	1395.02	[M+H]+	C9H14N2O	-	HMDB0031860	32594	206390
MW0142439	2-Indanone oxime;1,3-Dihydro-2H-inden-2-one oxime	-	-	146.06	147.068	[M-H]-	C9H9NO	C14639	-	76875	131720
MW0118635	2-Hydroxypyridine	-	-	94.0294	95.0371	[M-H]-	C5H5NO	C02502	HMDB0013751	8871	304900
MEDN1312	2-hydroxyphenylacetic acid	Organic acid And Its derivatives	Organic acid And Its derivatives	151	152.047	[M-H]-	C8H8O3	C05852	HMDB0000669	11970	2996200
MEDN1148	2-hydroxyhexadecanoic acid	FA	FFA	271.227	272.235	[M-H]-	C16H32O3	-	HMDB0031057	92836	287150
MEDN0283	2-Hydroxybutanoic Acid	Organic acid And Its derivatives	Organic acid And Its derivatives	103.003	104.047	[M-H]-	C4H8O3	C05984	HMDB0000008	11266	858260
MW0118621	2-Hydroxyatrazine	-	-	215.164	197.128	[M+NH4]+	C8H15N5O	C06552	HMDB0062766	135000000	180850
MEDP0151	2-Hydroxy-6-Aminopurine	Nucleotide And Its metabolomics	Nucleotide and Its metabolomics	152.1	151.049	[M+H]+	C5H5N5O	-	HMDB0000403	76900	147150
MEDP0598	2'-Hydroxy-5'-methylacetophenone	Benzene and substituted derivatives	Benzene and substituted derivatives	151.068	150.068	[M+H]+	C9H10O2	-	HMDB0032592	15068	348350
MEDP2028	2-Hydroxy-3-(4-hydroxyphenyl)propanoic acid	Benzene and substituted derivatives	Phenolic acids	183.065	182.058	[M+H]+	C9H10O4	-	HMDB0000755	9378	102250
MEDP1897	2-Hydroxy-2-methylbutanenitrile	Others	Others	100.075	99.0684	[M+H]+	C5H9NO	C11118	HMDB0060309	97823	735510
MW0130752	2H-1-Benzopyran-2-one, 8-(1,2-dihydroxy-3-methyl-3-buten-1-yl)-7-methoxy-	-	-	259.096	276.1	[M+H-H2O]+	C15H16O5	-	HMDB0132703	389002	544000
MW0112137	2-Fluoroethcathinone	-	-	259.122	195.106	[M+CH3CN+Na]+	C11H14FNO	-	-	102000000	453610
MW0003016	2-Ethyl-2-phenylmalonamide	-	-	207.112	206.106	[M+H]+	C11H14N2O2	C07499	-	23611	850430
MEDN1098	2-ethyl-2-hydroxybutyric acid	Organic acid And Its derivatives	Organic acid And Its derivatives	131.071	132.079	[M-H]-	C6H12O3	-	HMDB0001975	77199	51001
MEDN0141	2'-Deoxyuridine	Nucleotide And Its metabolomics	Nucleotide and Its metabolomics	227.067	228.075	[M-H]-	C9H12N2O5	C00526	HMDB0000012	13712	108540
MEDP0150	2'-Deoxyinosine	Nucleotide And Its metabolomics	Nucleotide and Its metabolomics	253.1	252.086	[M+H]+	C10H12N4O4	C05512	HMDB0000071	65058	1022200
MEDP1714	2'-Deoxyadenosine	Nucleotide And Its metabolomics	Nucleotide and Its metabolomics	270.968	269.112	[M+H]+	C10H15N5O4	C03363	HMDB0000101	9549172	3925800
MW0118495	2-Decylfuran	-	-	209.189	1521.16	[M+H]+	C14H24O	-	HMDB0032215	12762300	514380
MW0142293	2D-5-O-Methyl-2,3,5/4,6-pentahydroxycyclohexanone;5D-5-O-Methyl-2,3,5/4,6-pentahydroxycyclohexanone;D-5-O-Methyl-2,3,5/4,6-pentahydroxycyclohexanone	-	-	407.123	192.063	[2M+Na]+	C7H12O6	C01295	-	11953802	1236300
MW0013426	2-cis-4-trans-Abscisic acid	-	-	263.126	264.136	[M-H]-	C15H20O4	C06082	-	5280896	9
MEDP1956	2-Aminopurine	Nucleotide And Its metabolomics	Nucleotide and Its metabolomics	136.062	135.054	[M+H]+	C5H5N5	-	-	-	2917800
MEDP0734	2-Aminophenol	Benzene and substituted derivatives	Phenolics	110.2	109.053	[M+H]+	C6H7NO	C01987	-	5801	24534
MW0002719	2-amino-N-(4-(5-(phenanthren-2-yl)-3-(trifluoromethyl)-1H-pyrazol-1-yl)phenyl)acetamide	-	-	459.161	460.151	[M-H]-	C26H19F3N4O	-	-	10027278	60036
MEDP1100	2-Aminomethylpyrimidine	Nucleotide And Its metabolomics	Nucleotide and Its metabolomics	110.07	109.064	[M+H]+	C5H7N3	-	-	17848325	38073
MEDP0287	2-Aminoethanesulfonic Acid	Organic acid And Its derivatives	Sulfonic acids	126	125.015	[M+H]+	C2H7NO3S	C00245	HMDB0000251	1123	8095300
MEDP0286	2-Aminoethanesulfinic Acid	Organic acid And Its derivatives	Sulfonic acids	110	109.02	[M+H]+	C2H7NO2S	C00519	HMDB0000965	107812	181370
MW0142242	2'-Aminobiphenyl-2,3-diol	-	-	200.072	201.079	[M-H]-	C12H11NO2	C08061	-	441379	864160
MW0160853	2-amino-6-(cyclopropylamino)-1H-1,3,5-triazin-4-one	-	-	219.077	167.081	[M+Cl+NH3]-	C6H9N5O	-	-	6321196	3805700
MW0002691	2-Amino-5-nitrobenzoic acid	-	-	181.025	182.033	[M-H]-	C7H6N2O4	C19788	-	12032	96130
MW0002672	2-Amino-5-benzoylbenzimidazole	-	-	284.103	1395.02	[M+HCOO+2H]+	C14H11N3O	-	HMDB0060711	40320	2377200
MW0142222	2-Amino-4-hydroxy-6-hydroxymethyl-7,8-dihydropteridine	-	-	247.073	195.076	[M+Cl+NH3]-	C7H9N5O2	C01300	-	135000000	19103
MW0159981	2-amino-3-sulfopropanoic acid	-	-	220.995	169.005	[M+Cl+NH3]-	C3H7NO5S	-	-	25701	370500
MW0104504	2-Amino-3-phosphonopropionic acid	-	-	188.018	169.014	[M+F]-	C3H8NO5P	C05672	HMDB0000370	3857	191940
MW0142217	2-Amino-3-oxo-4-phosphonooxybutyrate;L-2-Amino-3-oxo-4-phosphonooxybutyrate;(2S)-2-Amino-3-oxo-4-phosphonooxybutanoate	-	-	235.99	213.004	[M+Na]+	C4H8NO7P	C07335	-	441260	1880300
MW0002636	2-Amino-3-chloro-1,4-naphthoquinone	-	-	206.006	207.009	[M-H]-	C10H6ClNO2	C18584	-	17748	664890
MW0159862	2-amino-3-(1H-imidazol-5-yl)propanal	-	-	317.114	139.075	[2M+K]+	C6H9N3O	-	-	775	9
MEDP2027	2-Amino-2-deoxymannose	Alcohol and amines	Amines	180.088	179.079	[M+H]+	C6H13NO5	-	-	123961	280710
MW0118204	2-Amino-1-methyl-6-phenylimidazo[4,5-b]pyridine	-	-	240.135	224.106	[M+NH4-2H]-	C13H12N4	C16038	HMDB0041008	1530	37565
MW0112067	2-Acetylthiazole	-	-	126.001	1381	[M-H]-	C5H5NOS	-	HMDB0032964	520108	122640
MEDN1192	2-Acetylresorcinol	Benzene and substituted derivatives	Phenolics	167.034	168.042	[M-H]-	C8H8O4	C21895	HMDB0011538	68073	34742
MW0112049	2-Acetyl-3-methylpyrazine	-	-	183.077	136.064	[M+HCOO+2H]+	C7H8N2O	-	HMDB0030001	32093	240110
MW0142198	2-Acetoxyamino-1-methyl-6-phenylimidazo[4,5-b]pyridine;N-Acetoxy-PhIP	-	-	283.117	282.112	[M+H]+	C15H14N4O2	C20287	-	25092289	11268
MW0002610	2-Acetamidophenol	-	-	150.055	151.063	[M-H]-	C8H9NO2	-	HMDB0061919	11972	255050
MW0013368	28-Homobrassinolide	-	-	493.357	1577.22	[M-H]-	C29H50O6	-	HMDB0030423	11038340	150550
MW0013261	21-Hydroxy-5b-pregnane-3,11,20-trione	-	-	365.209	263.072	[M+F]-	C21H30O4	-	HMDB0006756	44263345	477440
MW0013222	20-ethyl-PGE2	-	-	379.248	380.256	[M-H]-	C22H36O5	-	-	16061106	60126
MEDN1428	20-COOH-AA	FA	Oxidized lipids	333.207	334.214	[M-H]-	C20H30O4	-	-	6437827	41428
MW0130695	2-{9-hydroxy-2-oxo-2H,8H,9H-furo[2,3-h]chromen-8-yl}propan-2-yl acetate	-	-	325.066	304.095	[M+Na-2H]-	C16H16O6	-	HMDB0129092	132000000	438910
MW0118145	2-[4-(3,4-Methylenedioxyphenyl)butyl]-4(1H)-quinolinone	-	-	320.129	1493.13	[M-H]-	C20H19NO3	-	HMDB0030382	6325654	14665
MEDN1837	2,6-Di-tert-butyl-4-(hydroxymethyl)phenol	-	-	235.17	236.178	[M-H]-	C15H24O2	-	HMDB32048	6929	2223300
MW0002412	2,6-Di-tert-butyl-1,4-benzenediol	-	-	221.155	1226.83	[M-H]-	C14H22O2	-	HMDB0040178	75550	351950
MEDN1496	2,6-Dimethoxybenzoic acid	Organic acid And Its derivatives	Organic acid And Its derivatives	181.051	182.058	[M-H]-	C9H10O4	-	HMDB0029273	15109	462310
MW0130466	2,5-Dimethoxycinnamic acid	-	-	415.139	208.074	[2M-H]-	C11H12O4	-	-	697594	9
MEDN0648	2,5-Dihydroxybenzaldehyde	Benzene and substituted derivatives	Benzene and substituted derivatives	137.024	138.032	[M-H]-	C7H6O3	C05585	HMDB0004062	70949	148070
MW0111989	2,5-Dihydroxyacetophenone	-	-	135.043	152.047	[M+H-H2O]+	C8H8O3	-	HMDB0032629	10279	236450
MEDN0089	2,5-Dihydroxy Benzoic Acid	Benzene and substituted derivatives	Phenolic acids	153.019	154.027	[M-H]-	C7H6O4	C00628	HMDB0000152	3469	125140
MW0117975	2,5-Dihydro-2,4,5-trimethyloxazole	-	-	112.081	1338.96	[M-H]-	C6H11NO	-	HMDB0031199	31492	121410
MW0002271	2,4-Dihydroxybenzophenone	-	-	213.054	214.063	[M-H]-	C13H10O3	C14215	-	8572	201270
MEDN1322	2,3-Dihydroxybenzoic acid	Organic acid And Its derivatives	Organic acid And Its derivatives	153.019	154.027	[M-H]-	C7H6O4	C00196	HMDB0000397	19	125140
MW0002136	2,3-Diacetoxy-7,8-epoxy-24,29-dinor-1,3,5-friedelatriene-20-carboxylic acid	-	-	551.293	552.309	[M-H]-	C33H44O7	-	-	6710688	38490
MW0159842	2,3,4,5-tetrahydroxyhexanedioic acid	-	-	255.002	210.038	[M-H+2Na]+	C6H10O8	-	-	607	43122000
MW0002084	2,2'-Dihydroxybiphenyl	-	-	204.099	186.068	[M+NH4]+	C12H10O2	C03209	-	15731	20168000
MW0103317	2',2'-Difluorodeoxyuridine	-	-	311.066	1437.07	[M+HCOO+2H]+	C9H10F2N2O5	-	HMDB0060727	9871558	368400
MW0141934	2,22-Dideoxy-3-dehydroecdysone	-	-	446.324	430.308	[M-H+NH3]-	C27H42O4	C16498	-	23724770	365850
MW0104380	2,2,4-Trimethyl-1,3-pentanediol diisobutyrate	-	-	309.204	286.214	[M+Na]+	C16H30O4	-	HMDB0059777	23284	28410
MW0117718	2-(Methylthiomethyl)furan	-	-	146.069	1324.94	[M+NH4]+	C6H8OS	-	HMDB0032916	518937	266810
MEDN0415	2-(Formylamino)Benzoic Acid	Benzene and substituted derivatives	Phenolic acids	164.035	165.043	[M-H]-	C8H7NO3	C05653	HMDB0004089	101399	2259100
MW0163943	2-(5-methoxy-1H-indol-3-yl)acetaldehyde	-	-	188.071	189.079	[M-H]-	C11H11NO2	-	-	45479662	10132000
MEDN0554	2-(4-Hydroxyphenyl)ethanol	Benzene and substituted derivatives	Benzene and substituted derivatives	137.06	138.068	[M-H]-	C8H10O2	C06044	HMDB0004284	7044	1295700
MEDN1213	2-(4-hydroxyphenyl) propionate	Benzene and substituted derivatives	Phenolic acids	165.06	166.063	[M-H]-	C9H10O3	-	HMDB0041683	102526	78440
MW0117575	2-(4-Chloro-1H-indol-3-yl)acetic acid	-	-	208.024	209.024	[M-H]-	C10H8ClNO2	-	HMDB0032936	100413	245800
MEDP0606	2-(3,4-dimethoxyphenyl)ethanamine	Benzene and substituted derivatives	Benzene and substituted derivatives	182.11	181.11	[M+H]+	C10H15NO2	-	HMDB0041806	8421	70079
MW0165614	2-(3,4-dihydroxyphenyl)-2,5,7-trihydroxy-3H-chromen-4-one	-	-	356.049	304.058	[M+Cl+NH3]-	C15H12O7	-	-	90657995	41627
MW0001776	2-(2-Carboxyacetamido)benzoic acid	-	-	239.066	223.048	[M-H+NH3]-	C10H9NO5	C03147	HMDB0039495	439922	314330
MEDP1485	2-(2-Benzothiazolylthio)ethanol	Alcohol and amines	Alcohols	212	211.3	[M+H]+	C9H9NOS2	-	-	20790	3407700
MEDP2037	2-((3-Oxo-3-phenylpropyl)amino)acetic acid	Amino acid and Its metabolomics	Amino acids	208.097	207.09	[M+H]+	C11H13NO3	-	HMDB0002042	1608347	49001
MEDP1147	2 ', 6'-Dihydroxy-4'-methoxyacetophenone	Benzene and substituted derivatives	Benzene and substituted derivatives	183.056	182.058	[M+H]+	C9H10O4	-	HMDB0029646	24135	85272
MW0117303	1-Pyrroline-2-carboxylic acid	-	-	155.081	113.048	[M+CH3CN+H]+	C5H7NO2	C03564	HMDB0006875	440046	28989000
MW0117297	1-Pyrrolidinecarboxaldehyde	-	-	98.0654	1310.92	[M-H]-	C5H9NO	-	HMDB0034587	77372	15940000
MW0117286	1-Piperidinecarboxylic acid, 4-[bis(1,3-benzodioxol-5-yl)hydroxymethyl]-, 4-nitrophenyl ester	-	-	485.136	520.148	[M+H-2H2O]+	C27H24N2O9	-	-	25021165	9
MW0117285	1-Piperidinecarboxylic acid, 4-[[3-(4-pyridinyl)-1,2,4-oxadiazol-5-yl]methoxy]-, 1,1-dimethylethyl ester	-	-	407.189	360.18	[M+HCOO+2H]+	C18H24N4O4	-	-	11462546	251420
MW0012936	1-Oleoyl-2-acetyl-sn-glycerol	-	-	399.307	398.303	[M+H]+	C23H42O5	-	-	6437055	66767
MW0001675	1-Nitronaphthalene-5,6-oxide	-	-	258.04	189.043	[M+Na+HCOOH]+	C10H7NO3	C14800	HMDB0060331	11954051	1345600
MEDP0284	1-Naphthylacetic Acid	Organic acid And Its derivatives	Organic acid And Its derivatives	187.1	186.068	[M+H]+	C12H10O2	C13014	HMDB0032708	6862	40239
MW0111842	1-Naphthol β-D-glucuronide	-	-	301.071	320.09	[M-H2O-H]-	C16H16O7	C11586	-	114851	1192200
MW0001654	1-Naphthaleneacetamide	-	-	232.095	185.084	[M+HCOO+2H]+	C12H11NO	C18533	HMDB0032710	6861	185580
MW0001652	1-Naphthaldehyde	-	-	203.07	156.058	[M+HCOO+2H]+	C11H8O	C14090	HMDB0060325	6195	113540
MEDP0148	1-Methylxanthine	Nucleotide And Its metabolomics	Nucleotide and Its metabolomics	167.1	166.049	[M+H]+	C6H6N4O2	-	HMDB0010738	80220	94431
MEDP1713	1-Methylinosine	Nucleotide And Its metabolomics	Nucleotide and Its metabolomics	283.104	282.096	[M+H]+	C11H14N4O5	C12317	HMDB0002721	65095	85059
MEDP1475	1-Methyl-hydantoin	Heterocyclic compounds	Heterocyclic compounds	115	114.043	[M+H]+	C4H6N2O2	-	HMDB0003646	69217	288010
MEDP1138	1-methylhistamine	Alcohol and amines	Polyamines	126.101	125.095	[M+H]+	C6H13Cl2N3	C05127	HMDB0000898	11957601	193270
MEDP1162	1-Methylguanine	Nucleotide And Its metabolomics	Nucleotide and Its metabolomics	166.063	165.065	[M+H]+	C6H7N5O	C04152	HMDB0003282	3778	181830
MEDP1654	1-Methyladenosine	Nucleotide And Its metabolomics	Nucleotide and Its metabolomics	282	281.112	[M+H]+	C11H15N5O4	C02494	-	27476	1210200
MEDP0146	1-Methyladenine	Nucleotide And Its metabolomics	Nucleotide and Its metabolomics	150	149.07	[M+H]+	C6H7N5	C02216	HMDB0011599	78821	144900
MW0117205	1-Methyl-3-isobutylxanthine	-	-	245.106	222.112	[M+Na]+	C10H14N4O2	C13708	-	3758	11605000
MW0117158	1-Hydroxytacrine	-	-	261.125	214.111	[M+HCOO+2H]+	C13H14N2O	-	HMDB0060963	3655	18786000
MW0012841	1-Hydroxypropan-2-yl 2-isopropyl-5-methylcyclohexyl carbonate	-	-	257.176	1493.13	[M-H]-	C14H26O4	-	HMDB0059947	11642081	1605400
MEDP1003	1-Hydroxylamino-2-phenylethane	Benzene and substituted derivatives	Benzene and substituted derivatives	120.073	137	[M-H2O+H]+	C8H11NO	-	-	165091	244780
MW0111820	1-Hydroxy-1-(4-methoxyphenyl)propan-2-yl hexopyranoside	-	-	343.138	344.147	[M-H]-	C16H24O8	-	HMDB0033067	45360332	9179
MW0012808	1-Heptanol	-	-	163.132	116.12	[M+HCOO+2H]+	C7H16O	-	HMDB0031479	8129	282930
MEDP1247	1-deoxyvaleric acid	Organic acid And Its derivatives	Organic acid And Its derivatives	235.2	234.162	[M+H]+	C15H22O2	C20404	-	71448993	1127400
MW0141712	1-Dehydro-[6]-gingerdione	-	-	306.17	290.152	[M-H+NH3]-	C17H22O4	C17746	-	22321203	73309
MEDP1127	1-acetylindole	Heterocyclic compounds	Indole and Its derivatives	160.1	159.068	[M+H]+	C10H9NO	-	-	68470	1214800
MW0012754	1-Acetoxy-2-hydroxy-16-heptadecyn-4-one	-	-	325.234	1282.89	[M+H]+	C19H32O4	-	HMDB0031007	6710762	247940
MW0012734	19-Hydroxytestosterone	-	-	339.179	304.204	[M+Cl]-	C19H28O3	C05294	HMDB0060089	150968	370950
MW0141666	19(R)-hydroxy-PGF1	-	-	371.243	372.251	[M-H]-	C20H36O6	-	-	5283045	336040
MW0012656	17-Phenyltrinorprostaglandin E2 ethylamide	-	-	396.25	413.257	[M+H-H2O]+	C25H35NO4	-	-	52224406	52479
MW0012654	17-Phenyltrinorprostaglandin D2	-	-	409.206	386.209	[M+Na]+	C23H30O5	-	-	91746437	2939800
MW0141624	17-Oxosparteine	-	-	267.195	248.189	[M+F]-	C15H24N2O	C18158	-	51018055	114820
MEDN1112	16-Hydroxyhexadecanoic acid	FA	FFA	271.227	272.235	[M-H]-	C16H32O3	-	HMDB0006294	10466	287150
MW0012541	16alpha-Hydroxydehydroepiandrosterone	-	-	327.192	304.204	[M+Na]+	C19H28O3	C05139	HMDB0000352	102030	772270
MW0012540	16alpha-Hydroxyandrostenedione	-	-	379.107	302.188	[M-H+2K]+	C19H26O3	C05140	HMDB0006774	440574	296630
MW0012520	16,16-dimethyl-PGE1	-	-	381.261	382.272	[M-H]-	C22H38O5	-	-	5283058	682830
MW0012515	16,16-dimethyl-6-keto Prostaglandin E1	-	-	395.241	396.251	[M-H]-	C22H36O6	-	-	10905349	406290
MW0012488	15-oxo-5S,6R-dihydroxy-7E,9E,11Z,13E-eicosatetraenoic acid	-	-	349.199	1437.07	[M-H]-	C20H30O5	-	HMDB0062300	52921886	19294
MW0012473	15-Ketoprostaglandin E1	-	-	389.189	352.225	[M+Cl]-	C20H32O5	C04654	HMDB0001320	5280710	376660
MEDN1454	15-keto Prostaglandin F2α	FA	Oxidized lipids	351.22	352.225	[M-H]-	C20H32O5	C05960	HMDB0004240	5280887	59534
MEDL02163	15-Hydroperoxyicosatetraenoic acid	-	-	319.225	336.23	[M+H-H2O]+	C20H32O4	C05966	HMDB0004244	5280893	30567
MW0141428	15beta-Hydroxyprogesterone;15beta-Hydroxypregn-4-ene-3,20-dione	-	-	377.229	330.219	[M+H+HCOOH]+	C21H30O3	C19726	-	23239834	69440
MW0141409	15(R)-15-methyl PGF2	-	-	367.249	368.256	[M-H]-	C21H36O5	-	-	5283104	48251
MW0001492	14-Methoxy-4,4-bisnor-4,8,11,13-podocarpatetraen-3-one	-	-	243.133	242.131	[M+H]+	C16H18O2	-	-	6708585	6548400
MW0012381	14-Hydroxymyristic acid	-	-	245.202	244.204	[M-H]-	C14H28O3	-	-	3084276	7701.3
MW0012368	14,15-Leukotriene E4	-	-	440.243	439.239	[M+H]+	C23H37NO5S	-	-	52921882	65050
MEDL01857	13-Hydroxy-9Z,11E-octadecadienoic acid	-	-	311.257	310.25	[M+H]+	C19H34O3	-	HMDB0112194	5282947	41472
MEDN0375	13-HOTrE	FA	Oxidized lipids	293.212	294.1	[M-H]-	C18H30O3	-	HMDB0010203	10469728	40167
MW0141380	13E-Docosenamide	-	-	675.674	337.334	[2M+H]+	C22H43NO	-	-	-	2433500
MW0141371	13-Apo-beta-carotenone	-	-	293.173	258.198	[M+Cl]-	C18H26O	C20696	-	5363697	187430
MW0141364	13,14-dihydro-15-keto-tetranor Prostaglandin D2	-	-	279.159	298.178	[M-H2O-H]-	C16H26O5	-	-	-	35262
MW0168448	13,14-dihydro-15(R)-Prostaglandin E1	-	-	355.247	356.256	[M-H]-	C20H36O5	-	-	-	191590
MW0012274	13,14-Dihydro PGF-1a	-	-	357.264	358.272	[M-H]-	C20H38O5	-	HMDB0005076	5311239	257120
MW0012269	13(S)-HpOTrE； (9Z,11E,13S,15Z)-13-Hydroperoxyoctadeca-9,11,15-trienoic acid	-	-	309.204	310.214	[M-H]-	C18H30O4	C04785	-	5497123	2719400
MEDN1415	13(S)-HOTrE(γ)	FA	Oxidized lipids	293.212	294.219	[M-H]-	C18H30O3	-	-	5282971	135940
MW0141345	12-trans-Hydroxy juvenile hormone III	-	-	283.189	282.183	[M+H]+	C16H26O4	C16508	-	11011465	9
MW0168309	12-Oxo-2,3-dinor-10,15-phytodienoic acid	-	-	263.164	264.173	[M-H]-	C16H24O3	-	HMDB0032090	132000000	73724
MEDN1409	12-Hydroxyoctadecanoic acid	FA	FFA	299.261	300.266	[M-H]-	C18H36O3	-	HMDB0061706	7789	37410
MW0141336	12-Ethyl-8-propylbacteriochlorophyllide d	-	-	666.28	602.274	[M+CH3CN+Na]+	C35H38MgN4O4	C21433	-	124000000	469090
MW0141333	12-Ethyl-8-isobutyl-3-vinylbacteriochlorophyllide d	-	-	621.274	598.279	[M+Na]+	C36H38MgN4O3	C21429	-	124000000	454640
MEDN1081	12,13-DiHOME	FA	Oxidized lipids	313.238	314.246	[M-H]-	C18H34O4	-	-	10236635	284300
MEDN1458	11β-13,14-dihydro-15-keto Prostaglandin F2α	FA	Oxidized lipids	353.234	354.241	[M-H]-	C20H34O5	-	-	25755792	633290
MW0141274	11beta,21-Dihydroxy-3,20-oxo-5beta-pregnan-18-al	-	-	385.2	362.209	[M+Na]+	C21H30O5	C05473	HMDB0006754	21151226	244910
MW0012045	11,12,14-Trihydroxy-7-methoxy-8,11,13-abietatrien-20,6-olide	-	-	375.177	1338.96	[M-H]-	C21H28O6	-	HMDB0031932	132000000	2364100
MW0001484	11-(Dansylamino)undecanoic acid	-	-	417.219	434.224	[M+H-H2O]+	C23H34N2O4S	-	-	122016	26443000
MEDP1273	10-deoxyformamycin	Others	Others	454.3	453.309	[M+H]+	C25H43NO6	C11994	-	14155	1622400
MW0116766	1-[(5-Chloro-1H-indol-2-yl)carbonyl]-4-methylpiperazine	-	-	319.129	277.098	[M+CH3CN+H]+	C14H16ClN3O	-	-	4908365	2002000
MW0011966	1,8-Octanediol	-	-	188.163	146.131	[M+CH3CN+H]+	C8H18O2	C14218	-	69420	606580
MW0141191	1,8-Diazacyclotetradecane-2,9-dione	-	-	225.16	226.168	[M-H]-	C12H22N2O2	C04277	HMDB0033567	16	637050
MW0116743	1,8-Diazabicyclo[5.4.0]undec-7-ene	-	-	199.144	152.131	[M+HCOO+2H]+	C9H16N2	-	-	81184	5438300
MEDP0145	1,7-Dimethylxanthine	Nucleotide And Its metabolomics	Nucleotide and Its metabolomics	181.1	180.065	[M+H]+	C7H8N4O2	C13747	HMDB0001860	4687	23837
MW0141180	1,6,6-Trimethyl-2,7-dioxabicyclo[3.2.2]nonan-3-one	-	-	202.143	184.11	[M+NH4]+	C10H16O3	C04718	-	440456	3691000
MEDP0126	1,5-Diaminopentane	Alcohol and amines	Polyamines	103	102.116	[M+H]+	C5H14N2	C01672	HMDB0002322	273	9
MW0001376	1,4-PBIT	-	-	283.105	282.097	[M+H]+	C12H18N4S2	-	-	11957667	361820
MW0011956	1,4-Nonanediol diacetate	-	-	265.142	1437.07	[M+Na-2H]-	C13H24O4	-	HMDB0037184	12914607	367860
MEDP0115	1,4-Dihydro-1-Methyl-4-Oxo-3-Pyridinecarboxamide	Heterocyclic compounds	Pteridines and derivatives	153.06	152.059	[M+H]+	C7H8N2O2	C05843	HMDB0004194	440810	4187300
MEDP1464	1,3-Diphenylguanidine	Alcohol and amines	Polyamines	212.1	211.111	[M+H]+	C13H13N3	-	-	7594	12899
MEDP0282	1,3-Dimethyluric Acid	Amino acid and Its metabolomics	Amino acid derivatives	197	196.06	[M+H]+	C7H8N4O3	-	HMDB0001857	70346	336030
MW0116653	1,3-Dihydroxy-10-methylacridone	-	-	240.065	241.074	[M-H]-	C14H11NO3	C12093	-	5282066	258910
MEDP0281	1,3-Diaminopropane	Alcohol and amines	Amines	75	74.084	[M+H]+	C3H10N2	C00986	HMDB0000002	428	166980
MW0168174	1,3,3-trimethyl-2-oxabicyclo[2.2.2]octan-6-one	-	-	220.115	168.115	[M+Cl+NH3]-	C10H16O2	-	-	112203	4151100
MW0011930	1,2-Ditetradecanoyl-sn-glycero-3-phosphocholine	-	-	660.489	677.5	[M+H-H2O]+	C36H72NO8P	-	HMDB0007866	5459377	14880
MW0116591	1,2-Di(2-pyridyl)ethylene	-	-	229.1	182.084	[M+HCOO+2H]+	C12H10N2	-	-	5374802	5035300
MW0141088	1,2-Bis(4-hydroxyphenyl)-2-propanol	-	-	286.145	244.11	[M+CH3CN+H]+	C15H16O3	C13629	-	656691	560840
MW0141087	1,2-Bis(3,4-dimethoxyphenyl)propane-1,3-diol;1,2-Bis(3,4-dimethoxyphenyl)-1,3-propanediol	-	-	347.145	348.157	[M-H]-	C19H24O6	C04597	-	440402	122110
MW0116586	1,2-Benzisothiazol-3(2H)-one	-	-	152.016	1296.91	[M+H]+	C7H5NOS	-	HMDB0034413	17520	207610
MW0116568	1,2,3,6-Tetrahydrophthalimide	-	-	303.138	151.063	[2M+H]+	C8H9NO2	-	HMDB0033903	6808	272810
FDATP01353	1, 10-Phenanthroline monohydrate	-	-	199.087	198.079	[M+H]+	C12H10N2O	-	-	21226	7553000
MW0011825	1-(Sn-Glycero-3-phospho)-1D-myo-inositol	-	-	353.067	334.067	[M+F]-	C9H19O11P	C01225	HMDB0011649	45480545	56090
MW0141038	1-(p-Methoxyphenyl)-5-piperidino-1-penten-3-one	-	-	274.179	273.173	[M+H]+	C17H23NO2	-	-	6444496	109090
MW0141032	1-(5-Phosphoribosyl)imidazole-4-acetate	-	-	357.047	338.051	[M+F]-	C10H15N2O9P	C04437	HMDB0006032	440341	308710
MW0141029	1-(4-Methoxyphenyl)-3-(4-morpholinyl)-1-propanone;4'-Methoxy-3-morpholino-propiophenone	-	-	248.127	249.137	[M-H]-	C14H19NO3	C15032	-	121160	81933
MW0111648	1-(4-Hydroxyphenyl)ethanone	-	-	175.006	136.052	[M+K]+	C8H8O2	C10700	-	7469	1048600
MW0162477	1-(1H-indol-3-yl)ethane-1,2-diol	-	-	160.076	177.079	[M+H-H2O]+	C10H11NO2	-	-	25202910	12047000
MW0129314	{4-[3-hydroxy-2-oxo-8-(3,5,7-trihydroxy-4-oxo-3,4-dihydro-2H-1-benzopyran-2-yl)-4-oxatricyclo[4.3.1.0(3),]decan-10-yl]-2-methoxyphenyl}oxidanesulfonic acid	-	-	563.092	564.094	[M-H]-	C25H24O13S	-	HMDB0128744	132000000	147920
MW0104135	{3-[(1Z)-2-methyl-3-oxoprop-1-en-1-yl]phenyl}oxidanesulfonic acid	-	-	306.04	242.025	[M+CH3CN+Na]+	C10H10O5S	-	HMDB0133627	132000000	2404200
MW0129150	{2-hydroxy-5-[3-(4-hydroxyphenyl)propanoyl]phenyl}oxidanesulfonic acid	-	-	339.051	338.046	[M+H]+	C15H14O7S	-	HMDB0135445	132000000	9
MW0129053	{2-[2-(acetyloxy)propan-2-yl]-6-(2-methylbut-3-en-2-yl)-7-oxo-2H,3H,7H-furo[3,2-g]chromen-3-yl}oxidanesulfonic acid	-	-	471.115	452.114	[M+F]-	C21H24O9S	-	HMDB0130305	132000000	73122
MW0128884	[7-hydroxy-6-(7-hydroxy-4-oxo-4H-chromen-3-yl)-5-methoxy-2,2-dimethyl-3,4-dihydro-2H-1-benzopyran-3-yl]oxidanesulfonic acid	-	-	463.067	464.078	[M-H]-	C21H20O10S	-	HMDB0126002	132000000	61353
MW0128856	[5-hydroxy-7-methoxy-2,2-dimethyl-6-(3-phenylprop-2-enoyl)-3,4-dihydro-2H-1-benzopyran-4-yl]oxidanesulfonic acid	-	-	433.091	434.103	[M-H]-	C21H22O8S	-	HMDB0125833	132000000	68781
MW0162272	[5-(2-azaniumylethyl)-2-hydroxyphenyl] sulfate	-	-	465.066	233.036	[2M-H]-	C8H11NO5S	-	-	25201578	178890
MW0161227	[3-[2-(dimethylamino)ethoxy-hydroxyphosphoryl]oxy-2-tetradecanoyloxypropyl] tetradecanoate	-	-	778.345	663.484	[M-2H+3K]+	C35H70NO8P	-	-	9547023	220900
MW0104082	[3-(2-methyl-3-oxobut-1-en-1-yl)phenyl]oxidanesulfonic acid	-	-	320.056	256.041	[M+CH3CN+Na]+	C11H12O5S	-	HMDB0133693	132000000	465810
MW0128601	[2-hydroxy-1-(1-oxo-1H-isochromen-3-yl)butoxy]sulfonic acid	-	-	378.061	314.046	[M+CH3CN+Na]+	C13H14O7S	-	HMDB0130068	132000000	450240
MW0128581	[2,6-dihydroxy-3-(3,5,6,7-tetrahydroxy-4-oxo-4H-chromen-2-yl)phenyl]oxidanesulfonic acid	-	-	412.985	413.989	[M-H]-	C15H10O12S	-	HMDB0129448	132000000	50024
MW0160293	[(2S,3S,4S,5R)-2,3,4-trihydroxy-5-(phosphonooxymethyl)oxolan-2-yl]methyl dihydrogen phosphate	-	-	374.967	339.996	[M+Cl]-	C6H14O12P2	-	-	445557	2093100
MW0160646	[(2R,3S,4S,5R,6R)-3,4,5,6-tetrahydroxyoxan-2-yl]methyl 3,4,5-trihydroxybenzoate	-	-	333.076	332.074	[M+H]+	C13H16O10	-	-	5317463	234660
MW0166807	[(2R,3S,4R,5R,6R)-6-[(2S,3S,4S,5R)-3,4-dihydroxy-2,5-bis(hydroxymethyl)oxolan-2-yl]oxy-4,5-dihydroxy-2-(hydroxymethyl)oxan-3-yl] dodecanoate	-	-	261.133	524.283	[M-2H]-	C24H44O12	-	-	123000000	95198
MW0166718	[(2R,3S,4R,5R,6R)-6-[(2S,3S,4S,5R)-3,4-dihydroxy-2,5-bis(hydroxymethyl)oxolan-2-yl]oxy-4,5-dihydroxy-2-(hydroxymethyl)oxan-3-yl] decanoate	-	-	519.248	496.252	[M+Na]+	C22H40O12	-	-	123000000	2115400
MW0166724	[(2R,3S,4R,5R,6R)-6-[(2S,3S,4S,5R)-3,4-dihydroxy-2,5-bis(hydroxymethyl)oxolan-2-yl]oxy-4,5-dihydroxy-2-(hydroxymethyl)oxan-3-yl] 2-methylpropanoate	-	-	433.134	412.158	[M-2H+Na]-	C16H28O12	-	-	123000000	142230
MW0166040	[(2R)-3-hexadecanoyloxy-2-[(Z)-11-(3-pentyloxiran-2-yl)undec-9-enoyl]oxypropyl] 2-(trimethylazaniumyl)ethyl phosphate	-	-	796.542	773.557	[M+Na]+	C42H80NO9P	-	-	90659302	10028
MW0000860	[(2-Methoxybenzoyl)amino]acetic acid	-	-	273.087	209.069	[M+CH3CN+Na]+	C10H11NO4	-	HMDB0126552	791250	9215600
MEDP1706	(Z)-Guggulsterone	CoEnzyme and vitamins	CoEnzyme and vitamins	313.217	312.209	[M+H]+	C21H28O2	-	-	6450278	40569
MW0127139	(Z)-Ajoene	-	-	235.027	234.021	[M+H]+	C9H14OS3	C16757	HMDB0033566	9881148	2389400
MW0111522	(Z)-5-Octenal	-	-	253.216	1390.99	[2M+H]+	C8H14O	-	HMDB0039770	5283327	122150
MW0140731	(Z)-4-Hydroxyphenylacetaldehyde oxime;(Z)-[4-Hydroxyphenylacetaldehyde oxime]	-	-	150.055	151.063	[M-H]-	C8H9NO2	C04353	-	5459810	155340
MW0000847	(Z)-3-(3,4-Dimethoxy-phenyl)-2-pyridin-3-yl-acrylonitrile	-	-	267.113	266.106	[M+H]+	C16H14N2O2	-	-	5468216	171220
MW0116099	(Z)-1-(3-Ethyl-5-methoxy-2,3-dihydrobenzothiazol-2-ylidene)propan-2-one	-	-	296.09	249.082	[M+HCOO+2H]+	C13H15NO2S	-	-	1893668	323750
MEDP1029	(Z) -4 ', 6-dihydroxyfuranone	Heterocyclic compounds	Heterocyclic compounds	255.1	254.058	[M+H]+	C15H10O4	-	HMDB0033153	5281254	23119
MW0116092	(S)-N-Methylcoclaurine	-	-	334.126	299.152	[M+Cl]-	C18H21NO3	C05176	HMDB0060319	440584	482110
MW0116088	(S)-Mephenytoin	-	-	282.122	218.106	[M+CH3CN+Na]+	C12H14N2O2	C20130	HMDB0014673	107921	311270
MW0140678	(S)-Canadine;(S)-Tetrahydroberberine;(13aS)-5,8,13,13a-Tetrahydro-9,10-dimethoxy-6H-benzo[g]-1,3-benzodioxolo[5,6-a]quinolizine;(-)-Canadine	-	-	338.135	339.147	[M-H]-	C20H21NO4	C03329	-	21171	30135
MW0011639	(S)-Abscisic acid	-	-	301.084	1240.85	[M-2H+K]-	C15H20O4	-	HMDB0035140	5702609	91844
MW0140670	(S)-6-O-Methylnorlaudanosoline;(S)-3'-Hydroxycoclaurine	-	-	317.148	301.131	[M-H+NH3]-	C17H19NO4	C06517	-	441067	9494.1
MW0140661	(S)-3-Methyl-2-oxopentanoic acid;(S)-3-Methyl-2-oxopentanoate;(3S)-3-Methyl-2-oxopentanoic acid;(3S)-3-Methyl-2-oxopentanoate	-	-	299.094	130.063	[2M+K]+	C6H10O3	C00671	-	439286	151390
MW0011624	(S)-2-Hydroxy-2-methylsuccinic acid	-	-	149.043	148.037	[M+H]+	C5H8O5	C02614	-	441696	8582000
MW0000043	(S)-10-Hydroxycamptothecin	-	-	365.113	364.106	[M+H]+	C20H16N2O5	C17939	-	97226	497060
MW0000800	(R)-Mandelonitrile	-	-	134.059	133.053	[M+H]+	C8H7NO	C00561	HMDB0060486	9548674	973700
MW0011607	(R)-Dihydrolipoic acid	-	-	191.055	208.059	[M+H-H2O]+	C8H16O2S2	C02147	HMDB0012210	9834298	1982800
MEDN1493	(R)-3-Hydroxybutanoic acid	Organic acid And Its derivatives	Organic acid And Its derivatives	103.041	104.047	[M-H]-	C4H8O3	-	HMDB0000011	92135	72265
MEDP0823	(R)-2-Hydroxy-3-phenylpropionic acid	Organic acid And Its derivatives	Organic acid And Its derivatives	167	166.063	[M+H]+	C9H10O3	C05607	HMDB0000563	643327	2739000
MEDN1492	(R)-(-)-Mandelic acid	Organic acid And Its derivatives	Organic acid And Its derivatives	151.041	152.047	[M-H]-	C8H8O3	-	HMDB0062635	11914	1987800
MEDP1126	(R)-(-)-2-phenylglycine	Amino acid and Its metabolomics	Amino acid derivatives	120.073	137.084	[M-H2O+H]+	C8H11NO	-	-	2724025	244780
MEDP1907	(E,Z)-2-Amino-3,14-octadecadien-1-ol	Alcohol and amines	Alcohols	282.272	281.272	[M+H]+	C18H35NO	-	-	6439505	137310
MW0161302	(E)-N-[2-(5-hydroxy-1H-indol-3-yl)ethyl]-3-phenylprop-2-enamide	-	-	341.102	306.137	[M+Cl]-	C19H18N2O2	-	-	9995324	669340
MEDP1705	(E)-Guggulsterone	CoEnzyme and vitamins	CoEnzyme and vitamins	313.217	312.209	[M+H]+	C21H28O2	-	-	6439929	58037
MW0161667	(E)-3-(3,4-dihydroxyphenyl)-N-[2-(5-hydroxy-1H-indol-3-yl)ethyl]prop-2-enamide	-	-	361.118	338.127	[M+Na]+	C19H18N2O4	-	-	16659826	41926
MW0000777	(E)-3-(3-(2,4-Dimethoxybenzylidene)-3,4,5,6-tetrahydropyridin-2-yl)pyridine	-	-	309.159	308.152	[M+H]+	C19H20N2O2	C19905	-	5310985	2586700
MW0140526	(E)-2-Methylbutanal oxime	-	-	165.101	101.084	[M+CH3CN+Na]+	C5H11NO	C19491	-	12917320	264380
MW0128328	(E)-2-cyano-3-(3,4-dihydroxyphenyl)-N-phenylacrylamide	-	-	281.088	280.085	[M+H]+	C16H12N2O3	-	-	5328771	93585
MW0161517	(8S,9S,10R,13S,14S)-17-(2-hydroxyacetyl)-10,13-dimethyl-2,6,7,8,9,12,14,15,16,17-decahydro-1H-cyclopenta[a]phenanthrene-3,11-dione	-	-	413.195	344.199	[M+Na+HCOOH]+	C21H28O4	-	-	13783449	27935
MW0161662	(8R,10S,13S,17S)-17-hydroxy-10-(hydroxymethyl)-13-methyl-1,2,6,7,8,9,11,12,14,15,16,17-dodecahydrocyclopenta[a]phenanthren-3-one	-	-	339.178	304.204	[M+Cl]-	C19H28O3	-	-	16395893	253310
MW0161894	(5S,10S,13R,14R,17R)-10,13-dimethyl-17-[(2R)-6-methylhept-5-en-2-yl]-1,2,4,5,6,7,11,12,14,15,16,17-dodecahydrocyclopenta[a]phenanthren-3-one	-	-	385.333	382.324	[M+H]+	C27H42O	-	-	22298942	823920
MEDP1274	(4Z, 7Z, 10Z, 13Z, 16Z, 19Z) -Eicosahexaenoate	Aldehyde,Ketones,Esters	Esters	357.3	356.272	[M+H]+	C24H36O2	C16185	-	47205493	269380
MW0160044	(4-nitrophenyl) butanoate	-	-	190.05	209.069	[M-H-H2O]-	C10H11NO4	-	-	75834	62814
MW0000724	(4E)-1-(4-hydroxy-3-methoxyphenyl)dec-4-en-3-one	-	-	275.166	276.173	[M-H]-	C17H24O3	C10494	HMDB0137236	5281794	45586
MW0161483	(3S,5S,8S,9S,10S,13S,14S,17R)-3,17-dihydroxy-17-(2-hydroxyacetyl)-10,13-dimethyl-2,3,4,5,6,7,8,9,12,14,15,16-dodecahydro-1H-cyclopenta[a]phenanthren-11-one	-	-	441.142	364.225	[M-H+2K]+	C21H32O5	-	-	12444617	17469
MW0168192	(3R,6E)-3,7,11-trimethyldodeca-1,6,10-trien-3-ol	-	-	257.175	222.198	[M+Cl]-	C15H26O	-	-	11241545	157980
MW0115901	(3R,3aR,7aS)-3-Butylhexahydro-1(3H)-isobenzofuranone	-	-	195.139	1493.13	[M-H]-	C12H20O2	-	HMDB0034903	12367055	234220
MW0165684	(3R,10R,11S)-14-(hydroxymethyl)-3,10-dimethyl-6-propan-2-yltricyclo[9.3.0.03,7]tetradeca-1(14),6-dien-9-ol	-	-	327.231	304.24	[M+Na]+	C20H32O2	-	-	90658198	39740
MW0164445	(3E)-3-(1H-imidazol-5-ylmethylidene)-6-(1H-indol-3-ylmethyl)piperazine-2,5-dione	-	-	337.148	321.123	[M-H+NH3]-	C17H15N5O2	-	-	51136281	46293
MW0168178	(3aS,4S,7aS)-4-[2-(5-hydroxy-2-methylphenyl)ethyl]-7a-methyl-2,3,3a,4,6,7-hexahydroindene-1,5-dione	-	-	364.185	300.173	[M+CH3CN+Na]+	C19H24O3	-	-	14372344	76076
MW0140334	(2Z,6Z)-Farnesyl diphosphate	-	-	401.13	382.131	[M+F]-	C15H28O7P2	C19760	-	11132720	187580
MW0011108	(2Z,6E)-Farnesol	-	-	257.175	222.198	[M+Cl]-	C15H26O	C03220	HMDB0059849	1549108	1744300
MW0164607	(2S,3R,4R,5R,6R)-2-[(2R,3R,4R,5R,6R)-4,5-dihydroxy-2-(hydroxymethyl)-6-methoxyoxan-3-yl]oxy-6-(hydroxymethyl)-5-methoxyoxane-3,4-diol	-	-	351.132	370.147	[M-H-H2O]-	C14H26O11	-	-	53477780	1400300
MW0162343	(2S)-2-azaniumyl-4-(2-formamidophenyl)-4-oxobutanoate	-	-	235.071	236.08	[M-H]-	C11H12N2O4	-	-	25202092	40104
MW0000640	(2S)-2-Amino-3-phenyl-1-propanol	-	-	169.132	151.1	[M+NH4]+	C9H13NO	-	-	447213	92750
MW0160374	(2S)-2-[[2-(1H-indol-3-yl)acetyl]amino]-4-methylpentanoic acid	-	-	333.121	288.147	[M-H+2Na]+	C16H20N2O3	-	-	688142	1179800
MW0161369	(2R,3R,4S)-2-[(1R)-1,2-dihydroxyethyl]oxolane-3,4-diol	-	-	185.042	164.069	[M-2H+Na]-	C6H12O5	-	-	10953859	146880
MW0140291	(2R,3R)-3-Methylornithinyl-N6-lysine	-	-	309.17	274.2	[M+Cl]-	C12H26N4O3	C20278	-	57339222	83730
MW0164457	(2R)-4-(2-amino-3-hydroxyphenyl)-2-azaniumyl-4-oxobutanoate	-	-	243.08	224.08	[M+F]-	C10H12N2O4	-	-	51377238	229740
MW0166632	(2R)-4-(2-amino-3-hydroxy-4-methylphenyl)-2-azaniumyl-4-oxobutanoate	-	-	275.044	238.095	[M-2H+K]-	C11H14N2O4	-	-	103000000	20874
MW0160370	(2R)-2-phenyl-2-[3,4,5-trihydroxy-6-[[3,4,5-trihydroxy-6-(hydroxymethyl)oxan-2-yl]oxymethyl]oxan-2-yl]oxyacetonitrile	-	-	524.113	457.158	[M-2H+3Na]+	C20H27NO11	-	-	656495	46418
MW0161553	(2R)-2-hydroxy-2-(4-hydroxyphenyl)acetonitrile	-	-	172.038	149.048	[M+Na]+	C8H7NO2	-	-	14293614	541830
MW0128004	(2-oxo-1,2-diphenylethoxy)sulfonic acid	-	-	291.038	292.041	[M-H]-	C14H12O5S	-	HMDB0135190	20822593	950290
MW0140257	(25R)-26-Oxocholest-4-en-3-one	-	-	417.321	398.318	[M+F]-	C27H42O2	C21305	-	86290155	12032
MW0140256	(25R)-26-Hydroxycholest-4-en-3-one	-	-	199.169	400.334	[M-2H]-	C27H44O2	C21303	-	66932705	341450
MW0010941	(20S)-20-Hydroxypregn-4-en-3-one	-	-	351.213	316.24	[M+Cl]-	C21H32O2	C04042	HMDB0003069	8956	166940
MW0140217	(1R,2R)-3-[(1,2-Dihydro-2-hydroxy-1-naphthalenyl)thio]-2-oxopropanoic acid	-	-	263.042	264.046	[M-H]-	C13H12O4S	C14799	-	11954050	226460
MW0140215	(1R,10aS)-1,4,10,10a-Tetrahydrophenazine-1,6-dicarboxylate	-	-	271.07	272.08	[M-H]-	C14H12N2O4	C21409	-	119000000	2730900
MEDP1203	(1R, 6S) -6-amino-5-oxocyclohexyl-2-ene-1-carboxylic acid ester	Aldehyde,Ketones,Esters	Esters	156.1	155.058	[M+H]+	C7H9NO3	C19831	-	49852389	51798
MW0115792	(1-Methyl-1H-imidazol-4-yl)acetic acid	-	-	216.975	140.059	[M-H+2K]+	C6H8N2O2	C05828	HMDB0002820	75810	2416000
MW0140198	(13E)-Labda-7,13-dien-15-ol	-	-	308.295	290.261	[M+NH4]+	C20H34O	C20158	-	639636	52367
MW0140191	(11R)-Dihydroartemisinic aldehyde	-	-	203.18	220.183	[M+H-H2O]+	C15H24O	C20325	-	10857031	67038
MW0140188	(10S)-Juvenile hormone III diol	-	-	307.187	284.199	[M+Na]+	C16H28O4	C16505	-	10859043	31458
MW0127758	(1,3-diphenylpropoxy)sulfonic acid	-	-	291.077	292.077	[M-H]-	C15H16O4S	-	HMDB0135230	132000000	128560
MEDN1461	(±)7(8)-DiHDPE(A)	FA	Oxidized lipids	361.24	362.246	[M-H]-	C22H34O4	-	-	16061144	56128
MEDP1704	(±) Anabasine	Heterocyclic compounds	Heterocyclic compounds	163.125	162.116	[M+H]+	C10H14N2	-	HMDB0004350	2181	196150
MW0140132	(+)-Prosopinine	-	-	355.295	313.262	[M+CH3CN+H]+	C18H35NO3	C10167	-	442654	1092400
MW0000520	(+)-Norpseudoephedrine	-	-	325.198	151.1	[2M+Na]+	C9H13NO	C08300	-	441457	34479
MW0000519	(+)-Methamphetamine	-	-	213.138	149.12	[M+CH3CN+Na]+	C10H15N	C07164	HMDB0015517	10836	9
MW0140110	(+)-epi-alpha-Bisabolol;(2S)-6-Methyl-2-[(1R)-4-methylcyclohex-3-en-1-yl]hept-5-en-2-ol	-	-	257.175	222.198	[M+Cl]-	C15H26O	C20479	-	1201551	583640
MW0127747	(+)-Afzelechin	-	-	273.087	274.084	[M-H]-	C15H14O5	C09320	-	442154	89751
MW0127704	({6-[3-(4-hydroxyphenyl)-3-oxopropyl]-5-methoxy-2-methyl-2H-chromen-2-yl}methoxy)sulfonic acid	-	-	498.121	434.103	[M+CH3CN+Na]+	C21H22O8S	-	HMDB0125899	132000000	61823
MW0000499	(-)-Norephedrine	-	-	169.133	151.1	[M+NH4]+	C9H13NO	C07911	HMDB0001942	10297	469460
MW0103299	(-)-Neplanocin A	-	-	330.05	263.102	[M-2H+3Na]+	C11H13N5O3	-	-	490421	81884
MW0115732	(-)-Mefloquine	-	-	425.132	378.117	[M+HCOO+2H]+	C17H16F6N2O	C07633	-	40692	26861
MW0115731	(-)-Folicanthine	-	-	375.26	1405	[M+H]+	C24H30N4	-	HMDB0030198	604246	204650
MW0115724	(-)-3-Cyanomethyl-3-hydroxy-1H-indol-2(3H)-one	-	-	187.051	1423.05	[M-H]-	C10H8N2O2	-	HMDB0038633	11658413	1558800

## Sheet: Potential antimicrobial agents
Index	Compounds	1440
MW0126052	Pefloxacin	2908800
MW0063704	Sulfaphenazole	1654700
MW0139809	Tetrangomycin	1639400
MW0102923	Tricaproin	785790
MW0139552	Rabelomycin	410310
MW0009487	Platensimycin	109770
MW0126361	Pyrrolnitrin	108890
MW0151902	Jadomycin A;Jadomycin B aglycon	91654
MW0054311	Leptomycin B	25740
MW0144288	Aclacinomycin S;L-2-Deoxyfucosyl-L-rhodosaminyl-aklavinone	15030
MW0155571	Pikromycin	14435
